# Supplementary material for: Identification of a ceRNA Network in Lung Adenocarcinoma Based on Integration Analysis of Tumor-Associated Macrophage Signature Genes
Source: Frontiers journal article supplement (doi:10.3389/fcell.2021.629941), 2021-03-02

**Supplementary Figure S1.** Identification of outlier samples by cluster analysis based on DElncRNAs and DEMRNAs.

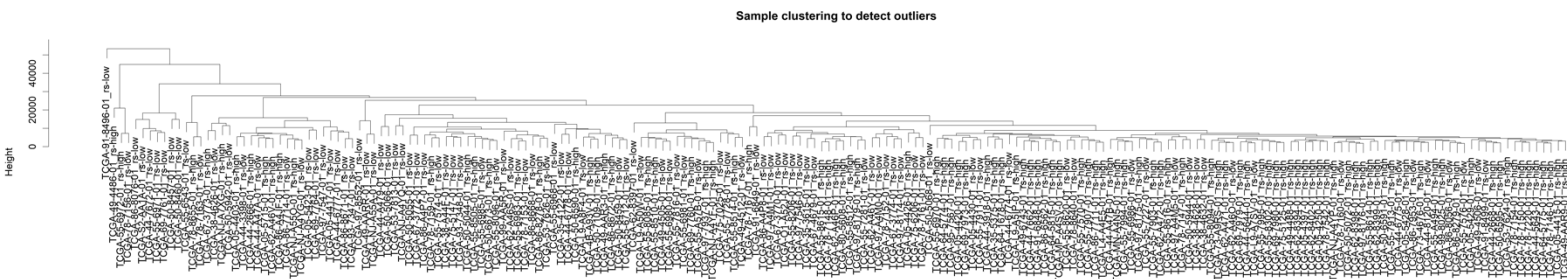

Supplement: Data_Sheet_1.PDF [file Data_Sheet_1.PDF]
