# Supplementary material for: Identification of a ceRNA Network in Lung Adenocarcinoma Based on Integration Analysis of Tumor-Associated Macrophage Signature Genes
Source: Front Cell Dev Biol. 2021 Mar 2;9:629941. doi: 10.3389/fcell.2021.629941 (PMC7960670; doi:10.3389/fcell.2021.629941)
Supplement: Supplementary file 3 [file Table_2.XLSX]

## Sheet: Module
Module	Num_All	Num_lncRNA	Num_mRNA	Num_ncRNA	Num_rRNA
grey	989	159	813	16	1
turquoise	341	42	291	8
blue	264	11	253
brown	161	46	112	3
yellow	126	10	116
green	97	5	92
red	86	43	36	7
black	72	8	64
pink	59	12	47
magenta	43		43
purple	42	6	36
greenyellow	41	3	38
tan	36	1	35

## Sheet: black
Gene Symbol	Biotype	style
ACADL	mRNA	down
ACVRL1	mRNA	down
ADRB2	mRNA	down
AGER	mRNA	down
ARHGEF15	mRNA	down
BTNL9	mRNA	down
C10orf10	mRNA	down
CALCRL	mRNA	down
CD93	mRNA	down
CDO1	mRNA	down
CLEC14A	mRNA	down
CNRIP1	mRNA	down
COL6A6	mRNA	down
COX4I2	mRNA	down
CSRNP1	mRNA	down
CYYR1	mRNA	down
DKK2	mRNA	down
DUSP1	mRNA	down
EDNRB	mRNA	down
EFCC1	mRNA	down
EMCN	mRNA	down
ERG	mRNA	down
FAM107A	mRNA	down
FAM162B	mRNA	down
FENDRR	lncRNA	down
FGD5	mRNA	down
FHL5	mRNA	down
FIGF	mRNA	down
FOXF1	mRNA	down
FXYD6	mRNA	down
GIMAP8	mRNA	down
GJA5	mRNA	down
GPIHBP1	mRNA	down
GRASP	mRNA	down
HDC	mRNA	down
HIGD1B	mRNA	down
HSPB6	mRNA	down
IL3RA	mRNA	down
JAM2	mRNA	down
KLF2	mRNA	down
LDB2	mRNA	down
LHFP	mRNA	down
LIMS2	mRNA	down
LINC00987	lncRNA	down
LMO2	mRNA	down
LRRC32	mRNA	down
LTBP4	mRNA	down
MBL1P	lncRNA	down
MMP19	mRNA	down
NPR1	mRNA	down
PECAM1	mRNA	down
PTH1R	mRNA	down
PTPRB	mRNA	down
RAMP2	mRNA	down
RAMP3	mRNA	down
RGCC	mRNA	down
RHOJ	mRNA	down
RP11-251M1.1	lncRNA	down
RP11-389C8.2	lncRNA	down
RP11-616M22.5	lncRNA	down
RP3-331H24.7	lncRNA	down
S1PR1	mRNA	down
SDPR	mRNA	down
SFTPC	mRNA	down
SH2D3C	mRNA	down
TBX2	mRNA	down
TBX2-AS1	lncRNA	down
TEK	mRNA	down
TMEM100	mRNA	down
TNNC1	mRNA	down
VIPR1	mRNA	down
VWF	mRNA	down

## Sheet: blue
Gene Symbol	Biotype	style
ACLY	mRNA	up
ALYREF	mRNA	up
ANLN	mRNA	up
AP000251.3	lncRNA	up
ARHGAP11A	mRNA	up
ARHGEF39	mRNA	up
ASF1B	mRNA	up
ASPM	mRNA	up
ASUN	mRNA	up
ATAD2	mRNA	up
AUNIP	mRNA	up
AURKA	mRNA	up
AURKB	mRNA	up
B3GNT5	mRNA	up
BLM	mRNA	up
BORA	mRNA	up
BRCA1	mRNA	up
BRI3BP	mRNA	up
BRIP1	mRNA	up
BUB1	mRNA	up
BUB1B	mRNA	up
BYSL	mRNA	up
C11orf84	mRNA	up
C16orf59	mRNA	up
C17orf53	mRNA	up
C1orf112	mRNA	up
C5orf34	mRNA	up
CAD	mRNA	up
CASC5	mRNA	up
CCDC150P1	lncRNA	up
CCDC34	mRNA	up
CCDC86	mRNA	up
CCNA2	mRNA	up
CCNF	mRNA	up
CCT5	mRNA	up
CD81	mRNA	down
CDC20	mRNA	up
CDC25A	mRNA	up
CDC25C	mRNA	up
CDC45	mRNA	up
CDC6	mRNA	up
CDC7	mRNA	up
CDCA2	mRNA	up
CDCA3	mRNA	up
CDCA5	mRNA	up
CDCA8	mRNA	up
CDK2	mRNA	up
CDT1	mRNA	up
CENPA	mRNA	up
CENPE	mRNA	up
CENPF	mRNA	up
CENPH	mRNA	up
CENPI	mRNA	up
CENPK	mRNA	up
CENPM	mRNA	up
CENPO	mRNA	up
CEP55	mRNA	up
CHAF1A	mRNA	up
CHAF1B	mRNA	up
CHEK1	mRNA	up
CKAP2	mRNA	up
CKAP2L	mRNA	up
CLSPN	mRNA	up
CRY2	mRNA	down
CSE1L	mRNA	up
CTD-2510F5.4	lncRNA	up
DARS2	mRNA	up
DDIAS	mRNA	up
DDX11	mRNA	up
DDX12P	lncRNA	up
DENR	mRNA	up
DEPDC1	mRNA	up
DEPDC1B	mRNA	up
DHX37	mRNA	up
DIAPH3	mRNA	up
DLGAP5	mRNA	up
DNA2	mRNA	up
DNAJB11	mRNA	up
DNMT3B	mRNA	up
DONSON	mRNA	up
DTL	mRNA	up
E2F1	mRNA	up
E2F7	mRNA	up
E2F8	mRNA	up
ECT2	mRNA	up
EIF4A3	mRNA	up
EIF4G1	mRNA	up
EME1	mRNA	up
EPT1	mRNA	up
ERCC6L	mRNA	up
ESPL1	mRNA	up
EXO1	mRNA	up
EZH2	mRNA	up
FAAP24	mRNA	up
FAM111B	mRNA	up
FAM136A	mRNA	up
FAM83D	mRNA	up
FANCD2	mRNA	up
FANCG	mRNA	up
FANCI	mRNA	up
FBXO45	mRNA	up
FCGRT	mRNA	down
FEN1	mRNA	up
FOXM1	mRNA	up
GCN1	mRNA	up
GINS3	mRNA	up
GINS4	mRNA	up
GMPS	mRNA	up
GSG2	mRNA	up
GTSE1	mRNA	up
H2AFX	mRNA	up
HDGF	mRNA	up
HELLS	mRNA	up
HJURP	mRNA	up
HMGA1	mRNA	up
HMGB2	mRNA	up
HSPD1	mRNA	up
IGF2BP3	mRNA	up
INCENP	mRNA	up
IQGAP3	mRNA	up
KIAA1524	mRNA	up
KIF11	mRNA	up
KIF14	mRNA	up
KIF15	mRNA	up
KIF18A	mRNA	up
KIF18B	mRNA	up
KIF20A	mRNA	up
KIF20B	mRNA	up
KIF23	mRNA	up
KIF2C	mRNA	up
KIF4A	mRNA	up
KIFC1	mRNA	up
KNSTRN	mRNA	up
KNTC1	mRNA	up
KPNA2	mRNA	up
KPNB1	mRNA	up
LMNB1	mRNA	up
LMNB2	mRNA	up
LYAR	mRNA	up
MAPK6	mRNA	up
MASTL	mRNA	up
MCM10	mRNA	up
MCM2	mRNA	up
MCM3	mRNA	up
MCM4	mRNA	up
MCM6	mRNA	up
MCM7	mRNA	up
MCM8	mRNA	up
MELK	mRNA	up
MIS18A	mRNA	up
MKI67	mRNA	up
MND1	mRNA	up
MSH2	mRNA	up
MTFR2	mRNA	up
MYBL2	mRNA	up
MYO19	mRNA	up
NCAPD2	mRNA	up
NCAPD3	mRNA	up
NCAPG	mRNA	up
NCAPG2	mRNA	up
NCAPH	mRNA	up
NDC1	mRNA	up
NDC80	mRNA	up
NEIL3	mRNA	up
NEK2	mRNA	up
NOL10	mRNA	up
NOP2	mRNA	up
NUDT1	mRNA	up
NUSAP1	mRNA	up
OIP5	mRNA	up
ORC1	mRNA	up
PA2G4	mRNA	up
PAICS	mRNA	up
PBK	mRNA	up
PGAM5	mRNA	up
PKMYT1	mRNA	up
PLK1	mRNA	up
PLK4	mRNA	up
PNPT1	mRNA	up
POLQ	mRNA	up
PPAT	mRNA	up
PPM1G	mRNA	up
PRC1	mRNA	up
PRKDC	mRNA	up
PRR11	mRNA	up
PSMC3IP	mRNA	up
PSMD11	mRNA	up
PSMD2	mRNA	up
PSRC1	mRNA	up
RACGAP1	mRNA	up
RAD51	mRNA	up
RAD54L	mRNA	up
RANBP1	mRNA	up
RECQL4	mRNA	up
RFC3	mRNA	up
RFC5	mRNA	up
RMI2	mRNA	up
RNFT2	mRNA	up
RP11-259N19.1	lncRNA	up
RP11-303E16.2	lncRNA	up
RP11-424C20.2	lncRNA	up
RP11-443B20.1	lncRNA	up
RP11-564D11.3	lncRNA	up
RRM2	mRNA	up
SAPCD2	mRNA	up
SGOL1	mRNA	up
SGOL2	mRNA	up
SHCBP1	mRNA	up
SKA1	mRNA	up
SKA3	mRNA	up
SKP2	mRNA	up
SLC2A1	mRNA	up
SLC7A1	mRNA	up
SLC7A5	mRNA	up
SMPD4	mRNA	up
SNRPA1	mRNA	up
SPAG5	mRNA	up
SPC24	mRNA	up
SRPK1	mRNA	up
SRSF9	mRNA	up
ST6GALNAC6	mRNA	down
STIL	mRNA	up
STIP1	mRNA	up
STRAP	mRNA	up
SUV39H1	mRNA	up
TACC3	mRNA	up
TCF19	mRNA	up
TEAD4	mRNA	up
THOP1	mRNA	up
TICRR	mRNA	up
TIMELESS	mRNA	up
TK1	mRNA	up
TMEM173	mRNA	down
TMPO	mRNA	up
TMPO-AS1	lncRNA	up
TONSL	mRNA	up
TOP2A	mRNA	up
TOPBP1	mRNA	up
TPX2	mRNA	up
TRAIP	mRNA	up
TRIP13	mRNA	up
TROAP	mRNA	up
TTK	mRNA	up
TUBB	mRNA	up
TUBG1	mRNA	up
TXNRD1	mRNA	up
TYMS	mRNA	up
TYMSOS	lncRNA	up
UBE2C	mRNA	up
UBE2S	mRNA	up
UCK2	mRNA	up
UHRF1	mRNA	up
UNG	mRNA	up
WDHD1	mRNA	up
WDR62	mRNA	up
WDR76	mRNA	up
WHSC1	mRNA	up
XPO5	mRNA	up
XPOT	mRNA	up
XRCC2	mRNA	up
YARS2	mRNA	up
YWHAG	mRNA	up
ZWILCH	mRNA	up
ZWINT	mRNA	up

## Sheet: green
Gene Symbol	Biotype	style
ACTL6A	mRNA	up
BIRC5	mRNA	up
BOLA3	mRNA	up
CCDC167	mRNA	up
CCDC58	mRNA	up
CCNB1	mRNA	up
CCNB2	mRNA	up
CDCA4	mRNA	up
CDK1	mRNA	up
CDKN3	mRNA	up
CENPL	mRNA	up
CENPN	mRNA	up
CENPU	mRNA	up
CENPW	mRNA	up
CHEK2	mRNA	up
CKS1B	mRNA	up
CKS2	mRNA	up
CYC1	mRNA	up
CYCS	mRNA	up
DBF4	mRNA	up
DDX39A	mRNA	up
DERA	mRNA	up
DSCC1	mRNA	up
DSN1	mRNA	up
DTYMK	mRNA	up
ECE2	mRNA	up
EIF4EBP1	mRNA	up
EIF5A	mRNA	up
FAM64A	mRNA	up
GAPDH	mRNA	up
GGH	mRNA	up
GINS1	mRNA	up
GINS2	mRNA	up
GMNN	mRNA	up
H2AFZ	mRNA	up
HMMR	mRNA	up
HSPE1	mRNA	up
KIAA0101	mRNA	up
LRRC42	mRNA	up
MAD2L1	mRNA	up
MEST	mRNA	up
MRPL13	mRNA	up
MRPL15	mRNA	up
MRPL3	mRNA	up
MRPL47	mRNA	up
MRPL51	mRNA	up
MRPS12	mRNA	up
MRPS35	mRNA	up
MTHFD2	mRNA	up
MYL6B	mRNA	up
NELFE	mRNA	up
NME1	mRNA	up
NUF2	mRNA	up
NUP37	mRNA	up
ORC6	mRNA	up
PARPBP	mRNA	up
PCNA	mRNA	up
PDCD5	mRNA	up
PFDN4	mRNA	up
PFDN6	mRNA	up
PFN2	mRNA	up
POC1A	mRNA	up
POLE2	mRNA	up
POLR2H	mRNA	up
POP7	mRNA	up
PPIAP22	lncRNA	up
PPIL1	mRNA	up
PRTFDC1	mRNA	up
PSAT1	mRNA	up
PSMD14	mRNA	up
PTTG1	mRNA	up
RAD51AP1	mRNA	up
RAN	mRNA	up
RFC2	mRNA	up
RFC4	mRNA	up
RNASEH2A	mRNA	up
RPL39L	mRNA	up
RPP40	mRNA	up
RUVBL1	mRNA	up
SF3B6	mRNA	up
SNHG1	lncRNA	up
SNRPB	mRNA	up
SNRPC	mRNA	up
SNRPD1	mRNA	up
SNRPE	mRNA	up
SNRPEP2	lncRNA	up
SNRPF	mRNA	up
SNRPG	mRNA	up
SNRPGP2	lncRNA	up
SPC25	mRNA	up
STMN1	mRNA	up
STOML2	mRNA	up
TPI1	mRNA	up
TUBA1C	mRNA	up
UBE2SP1	lncRNA	up
UBE2T	mRNA	up
UQCC2	mRNA	up

## Sheet: grey
Gene Symbol	Biotype	style
A4GALT	mRNA	up
AADAC	mRNA	down
ABAT	mRNA	down
ABCA3	mRNA	down
ABCC2	mRNA	up
ABCC6	mRNA	down
ABCC6P2	lncRNA	down
AC005052.1	ncRNA	down
AC007318.5	lncRNA	up
AC008268.1	lncRNA	down
AC009506.1	lncRNA	down
AC016700.5	lncRNA	up
AC079630.4	lncRNA	down
AC090616.2	lncRNA	down
AC124944.5	lncRNA	up
AC244157.1	ncRNA	down
ACADSB	mRNA	down
ACAT2	mRNA	up
ACOXL	mRNA	down
ACSL5	mRNA	down
ACSM3	mRNA	down
ACSS1	mRNA	down
ADAMTS1	mRNA	down
ADAMTSL4	mRNA	down
ADCY9	mRNA	down
ADGRD1	mRNA	down
ADGRF4	mRNA	up
ADGRF5	mRNA	down
ADM	mRNA	up
ADRA2A	mRNA	down
ADRB1	mRNA	down
ADRBK2	mRNA	down
AF064858.11	lncRNA	down
AHNAK2	mRNA	up
AIM1L	mRNA	up
AK1	mRNA	down
AK4	mRNA	up
AKAP13	mRNA	down
AKR1B10	mRNA	up
AKR7A3	mRNA	up
ALDH2	mRNA	down
ALDH3B2	mRNA	up
ALDOA	mRNA	up
ALG3	mRNA	up
ALOX15B	mRNA	down
ALPL	mRNA	down
AMIGO1	mRNA	down
ANGPTL4	mRNA	up
ANKRD22	mRNA	down
ANKRD29	mRNA	down
ANOS1	mRNA	down
ANXA6	mRNA	down
AP001065.15	lncRNA	down
AP1S2	mRNA	down
APBB1	mRNA	down
APLNR	mRNA	down
APOBEC3C	mRNA	down
APOD	mRNA	down
AQP1	mRNA	down
AQP3	mRNA	down
AQP4	mRNA	down
ARHGAP20	mRNA	down
ARHGAP24	mRNA	down
ARHGAP44	mRNA	down
ARHGDIB	mRNA	down
ARHGEF4	mRNA	up
ARMCX1	mRNA	down
ARNTL2	mRNA	up
ARPC1A	mRNA	up
ARRDC3	mRNA	down
ARTN	mRNA	up
ASAH1	mRNA	down
ATAD3A	mRNA	up
ATP2A2	mRNA	up
ATP5G1P4	lncRNA	up
ATP6V0A4	mRNA	up
ATP8A1	mRNA	down
AUTS2	mRNA	down
AXIN2	mRNA	down
B3GNT3	mRNA	up
B3GNT8	mRNA	down
B4GALT1	mRNA	up
BAAT	mRNA	down
BAIAP2L1	mRNA	up
BASP1	mRNA	up
BCL2	mRNA	down
BCL2L12	mRNA	up
BCRP3	lncRNA	down
BDH2	mRNA	down
BEX2	mRNA	down
BEX4	mRNA	down
BHLHE41	mRNA	down
BIK	mRNA	up
BMP2	mRNA	down
BMP3	mRNA	down
BMX	mRNA	down
BNIP3P11	lncRNA	up
BOP1	mRNA	up
BRIX1	mRNA	up
BTG2	mRNA	down
BZW2	mRNA	up
C14orf132	lncRNA	down
C15orf48	mRNA	up
C16orf89	mRNA	down
C19orf48	mRNA	up
C1QTNF6	mRNA	up
C1orf116	mRNA	down
C1orf186	mRNA	down
C1orf21	mRNA	down
C20orf24	mRNA	up
C4BPA	mRNA	down
C4orf19	mRNA	down
C5orf38	mRNA	down
C6orf223	mRNA	up
C7	mRNA	down
C8orf34-AS1	lncRNA	down
C9orf135	mRNA	down
CA3	mRNA	down
CABLES1	mRNA	down
CABYR	mRNA	up
CACHD1	mRNA	down
CACNA2D2	mRNA	down
CADM1	mRNA	down
CADPS2	mRNA	down
CAMK1D	mRNA	down
CAMK2D	mRNA	down
CARD14	mRNA	up
CAT	mRNA	down
CBFA2T3	mRNA	down
CBLC	mRNA	up
CBR3	mRNA	up
CBX2	mRNA	up
CCDC137	mRNA	up
CCDC69	mRNA	down
CCL17	mRNA	down
CCL22	mRNA	down
CCND2	mRNA	down
CCNE1	mRNA	up
CCT3	mRNA	up
CCT6A	mRNA	up
CCT8P1	lncRNA	down
CD109	mRNA	up
CD1A	mRNA	down
CD1B	mRNA	down
CD1E	mRNA	down
CD207	mRNA	down
CD36	mRNA	down
CD44	mRNA	down
CD59	mRNA	down
CD82	mRNA	down
CD96	mRNA	down
CDH11	mRNA	down
CDH24	mRNA	up
CDH3	mRNA	up
CDIP1	mRNA	down
CDK14	mRNA	down
CDKL2	mRNA	down
CDR2L	mRNA	up
CEACAM21	mRNA	down
CEACAM4	mRNA	down
CEBPA	mRNA	down
CEBPA-AS1	lncRNA	down
CELF2	mRNA	down
CERKL	mRNA	down
CES3	mRNA	down
CFD	mRNA	down
CFI	mRNA	down
CFTR	mRNA	down
CGNL1	mRNA	down
CH17-340M24.3	lncRNA	down
CH25H	mRNA	down
CHAC1	mRNA	up
CHI3L2	mRNA	down
CHML	mRNA	up
CHTF18	mRNA	up
CIRBP	mRNA	down
CISH	mRNA	down
CITED2	mRNA	down
CKAP4	mRNA	up
CLDN18	mRNA	down
CLDN2	mRNA	down
CLEC2B	mRNA	down
CLEC3B	mRNA	down
CLIC2	mRNA	down
CLIC5	mRNA	down
CLIC6	mRNA	down
CLU	mRNA	down
CMAS	mRNA	up
CMB9-22P13.1	lncRNA	up
CNR1	mRNA	down
CNTD2	mRNA	up
COA6	mRNA	up
COL4A3	mRNA	down
COL4A4	mRNA	down
COL7A1	mRNA	up
COL8A2	mRNA	down
COLCA1	lncRNA	down
COMTD1	mRNA	up
CPA3	mRNA	down
CPB2	mRNA	down
CPQ	mRNA	down
CPVL	mRNA	down
CPXM2	mRNA	down
CRTAC1	mRNA	down
CRYM	mRNA	down
CSF1	mRNA	down
CSF2	mRNA	down
CST2	mRNA	down
CST5	mRNA	down
CST7	mRNA	down
CSTA	mRNA	down
CTA-126B4.7	lncRNA	down
CTB-113P19.5	lncRNA	down
CTB-134H23.3	lncRNA	down
CTB-193M12.5	lncRNA	up
CTB-36H16.2	lncRNA	down
CTB-43E15.2	lncRNA	down
CTC-231O11.1	lncRNA	down
CTC-548K16.1	lncRNA	up
CTD-2134A5.4	lncRNA	up
CTD-2357A8.3	lncRNA	up
CTD-2376I4.2	lncRNA	down
CTD-2547L24.3	lncRNA	down
CTD-2555C10.3	lncRNA	up
CTD-2562J17.6	lncRNA	down
CTDSPL	mRNA	down
CTSD	mRNA	down
CTSE	mRNA	down
CTSF	mRNA	down
CTSG	mRNA	down
CTSH	mRNA	down
CTSO	mRNA	down
CTSV	mRNA	up
CX3CL1	mRNA	down
CX3CR1	mRNA	down
CXCL14	mRNA	down
CYB5A	mRNA	down
CYFIP2	mRNA	down
CYP27A1	mRNA	down
CYP2B7P	lncRNA	down
CYP4B1	mRNA	down
CYP4V2	mRNA	down
CYP4X1	mRNA	down
CYP7B1	mRNA	down
CYS1	mRNA	down
CYSLTR1	mRNA	down
DAAM2	mRNA	down
DAPK1	mRNA	down
DAPK2	mRNA	down
DBN1	mRNA	up
DCUN1D5	mRNA	up
DDIT3	mRNA	up
DDO	mRNA	down
DHCR7	mRNA	up
DHRS3	mRNA	down
DIO1	mRNA	down
DIRAS3	mRNA	down
DKK3	mRNA	down
DLC1	mRNA	down
DMBT1	mRNA	down
DNAAF5	mRNA	up
DNASE1L3	mRNA	down
DNTTIP1	mRNA	up
DPT	mRNA	down
DPYD	mRNA	down
DPYSL2	mRNA	down
DRAM1	mRNA	down
DSC2	mRNA	up
DSG2	mRNA	up
DSP	mRNA	up
DUOX1	mRNA	down
DUOXA1	mRNA	down
DUSP14	mRNA	up
EFNA3	mRNA	up
EGLN3	mRNA	up
EGR2	mRNA	down
EGR3	mRNA	down
EHMT2	mRNA	up
EIF3B	mRNA	up
EIF4E3	mRNA	down
ELMO1	mRNA	down
ELOVL6	mRNA	up
EMB	mRNA	down
EMP2	mRNA	down
ENC1	mRNA	down
ENG	mRNA	down
ENPP2	mRNA	down
ENPP5	mRNA	down
ENTPD3	mRNA	down
EPHA3	mRNA	down
EPHA4	mRNA	down
EPHB6	mRNA	down
EPHX2	mRNA	down
EPN3	mRNA	up
ERO1A	mRNA	up
ERRFI1	mRNA	up
ERVMER34-1	mRNA	up
ESAM	mRNA	down
ESYT3	mRNA	down
ETV1	mRNA	down
EVA1A	mRNA	down
EVA1C	mRNA	down
F2R	mRNA	down
F8	mRNA	down
FABP3	mRNA	down
FABP4	mRNA	down
FADS1	mRNA	up
FADS2	mRNA	up
FAM105A	mRNA	down
FAM117A	mRNA	down
FAM184A	mRNA	down
FAM189A2	mRNA	down
FAM198B	mRNA	down
FAM83A	mRNA	up
FAM83A-AS1	lncRNA	up
FAM83H	mRNA	up
FAM83H-AS1	lncRNA	up
FBLN5	mRNA	down
FBP1	mRNA	down
FCGBP	mRNA	down
FCHO2	mRNA	down
FGA	mRNA	up
FGF14-AS2	lncRNA	down
FGFBP1	mRNA	up
FGFR2	mRNA	down
FGL2	mRNA	down
FIBIN	mRNA	down
FILIP1	mRNA	down
FILIP1L	mRNA	down
FKBP4	mRNA	up
FLAD1	mRNA	up
FMO3	mRNA	down
FMO4	mRNA	down
FMO5	mRNA	down
FMOD	mRNA	down
FOLR1	mRNA	down
FOSB	mRNA	down
FOSL1	mRNA	up
FOXF2	mRNA	down
FOXO1	mRNA	down
FRY	mRNA	down
FRZB	mRNA	down
FUCA1	mRNA	down
FZD10	mRNA	up
G6PD	mRNA	up
GALNT10	mRNA	down
GALNT18	mRNA	down
GALNT6	mRNA	up
GAPDHP65	lncRNA	up
GARS	mRNA	up
GAS6	mRNA	down
GATA6	mRNA	down
GATA6-AS1	lncRNA	down
GATM	mRNA	down
GCLC	mRNA	up
GGA2	mRNA	down
GGT5	mRNA	down
GGTLC1	mRNA	down
GJB1	mRNA	down
GJB2	mRNA	up
GJB3	mRNA	up
GLB1L3	mRNA	down
GMPR	mRNA	down
GNPNAT1	mRNA	up
GOLM1	mRNA	up
GPC3	mRNA	down
GPD1	mRNA	down
GPD1L	mRNA	down
GPI	mRNA	up
GPR160	mRNA	down
GPR171	mRNA	down
GPRIN1	mRNA	up
GRIN2D	mRNA	up
GSDMC	mRNA	up
GSR	mRNA	up
GTF2IRD1	mRNA	up
GTPBP4	mRNA	up
GZMM	mRNA	down
H1F0	mRNA	up
HABP2	mRNA	down
HAGLR	lncRNA	down
HAS3	mRNA	down
HBA2	mRNA	down
HBB	mRNA	down
HEIH	lncRNA	down
HES4	mRNA	up
HGF	mRNA	down
HHIP	mRNA	down
HHIP-AS1	lncRNA	down
HHIPL2	mRNA	up
HILPDA	mRNA	up
HIP1	mRNA	down
HIST1H2BJ	mRNA	up
HIST1H2BO	mRNA	up
HK2	mRNA	up
HLA-B	mRNA	down
HLA-C	mRNA	down
HLA-DMA	mRNA	down
HLA-DPB2	lncRNA	down
HLA-DQA2	mRNA	down
HLA-DQB1	mRNA	down
HLA-DQB2	mRNA	down
HLA-DRB5	mRNA	down
HLA-DRB6	lncRNA	down
HLA-DRB9	lncRNA	down
HLF	mRNA	down
HMGB3	mRNA	up
HN1	mRNA	up
HNMT	mRNA	down
HOPX	mRNA	down
HOXD1	mRNA	down
HPDL	mRNA	up
HSD17B11	mRNA	down
HSD17B4	mRNA	down
HSD17B6	mRNA	down
HSPA1A	mRNA	up
HSPA1B	mRNA	up
HSPB8	mRNA	down
HTR1D	mRNA	up
ID2	mRNA	down
ID4	mRNA	down
IDH2	mRNA	up
IER3	mRNA	up
IER5	mRNA	up
IER5L	mRNA	up
IFRD1	mRNA	up
IGF2BP2	mRNA	up
IGHV3-66	mRNA	down
IGHV3-72	mRNA	down
IGKV1D-16	mRNA	down
IGKV2D-30	mRNA	down
IGKV2D-40	mRNA	down
IGKV3D-7	mRNA	down
IGLV10-54	mRNA	down
IGLV4-3	mRNA	down
IGLV4-60	mRNA	down
IGLV5-45	mRNA	down
IGLV9-49	mRNA	down
IGSF9	mRNA	up
IL13RA2	mRNA	down
IL1R2	mRNA	up
IL20RB	mRNA	up
IL24	mRNA	down
IL33	mRNA	down
IL34	mRNA	down
IL6R	mRNA	down
INAFM2	lncRNA	down
INHA	mRNA	up
INTS1	mRNA	up
IQGAP2	mRNA	down
IRAK3	mRNA	down
IRX1	mRNA	down
IRX2	mRNA	down
ISG15	mRNA	up
ITGB2-AS1	lncRNA	down
ITGB6	mRNA	down
ITIH5	mRNA	down
ITPKA	mRNA	up
JAM3	mRNA	down
JUP	mRNA	up
KB-68A7.1	lncRNA	down
KCNA3	mRNA	down
KCND3	mRNA	down
KCNJ15	mRNA	down
KCNJ5	mRNA	down
KCNK17	mRNA	down
KIF3C	mRNA	up
KISS1R	mRNA	up
KLF13	mRNA	down
KLF15	mRNA	down
KLF9	mRNA	down
KLHDC7A	mRNA	down
KRT16	mRNA	up
KRT18	mRNA	up
KRT6A	mRNA	up
KRT8	mRNA	up
KRT80	mRNA	up
KRT8P45	lncRNA	up
LAMC2	mRNA	up
LAMP3	mRNA	down
LAMP5	mRNA	down
LDHB	mRNA	up
LGALS9	mRNA	down
LHFPL3-AS2	lncRNA	down
LIF	mRNA	up
LIFR	mRNA	down
LINC00261	lncRNA	down
LINC00342	lncRNA	down
LINC00346	lncRNA	up
LINC00511	lncRNA	up
LINC00857	lncRNA	up
LINC00959	lncRNA	down
LINC01269	lncRNA	up
LINC01270	lncRNA	up
LINC01315	lncRNA	down
LINC01504	lncRNA	down
LINC01564	lncRNA	up
LINC01569	lncRNA	down
LITAF	mRNA	down
LIX1L	mRNA	down
LL22NC03-75H12.2	lncRNA	down
LOXL2	mRNA	up
LPAL2	lncRNA	down
LPCAT2	mRNA	down
LPL	mRNA	down
LRFN4	mRNA	up
LRIG1	mRNA	down
LRMP	mRNA	down
LRRC17	mRNA	down
LRRC31	mRNA	down
LRRC36	mRNA	down
LRRC59	mRNA	up
LRRK2	mRNA	down
LTBR	mRNA	up
LTF	mRNA	down
LUCAT1	lncRNA	up
LY6K	mRNA	up
LYPD3	mRNA	up
MACROD2	mRNA	down
MAFG-AS1	lncRNA	up
MAGEH1	mRNA	down
MAL	mRNA	down
MAN1A1	mRNA	down
MAN1C1	mRNA	down
MAOB	mRNA	down
MARC2	mRNA	down
MATN3	mRNA	down
MCEMP1	mRNA	down
MDFI	mRNA	up
MEGF6	mRNA	down
MEOX2	mRNA	down
MEX3A	mRNA	up
MFI2	mRNA	up
MFSD2A	mRNA	down
MGLL	mRNA	down
MID1IP1-AS1	lncRNA	down
MIF	mRNA	up
MIR23A	ncRNA	down
MIR27A	ncRNA	down
MIR5195	ncRNA	down
MIR621	ncRNA	up
MIR6835	ncRNA	up
MISP	mRNA	up
MITF	mRNA	down
MLF2	mRNA	up
MMP14	mRNA	up
MMP17	mRNA	up
MMP24	mRNA	down
MOXD1	mRNA	down
MPZL2	mRNA	down
MR1	mRNA	down
MRGBP	mRNA	up
MRPL12	mRNA	up
MS4A15	mRNA	down
MT-ND5	mRNA	down
MT-ND6	mRNA	down
MTFR1	mRNA	up
MTSS1	mRNA	down
MTURN	mRNA	down
MTX1P1	lncRNA	up
MUC16	mRNA	up
MYEOV	mRNA	up
MYOZ1	mRNA	down
MZT2A	mRNA	up
MZT2B	mRNA	up
NAMPT	mRNA	up
NAPSA	mRNA	down
NATD1	mRNA	down
NCALD	mRNA	down
NCMAP	mRNA	down
NDN	mRNA	down
NDNF	mRNA	down
NDRG1	mRNA	up
NDRG2	mRNA	down
NDUFS6	mRNA	up
NEDD9	mRNA	down
NIPAL3	mRNA	down
NKD2	mRNA	down
NMB	mRNA	up
NMU	mRNA	up
NOTCH3	mRNA	up
NPC2	mRNA	down
NPNT	mRNA	down
NPR3	mRNA	down
NPTXR	mRNA	down
NPW	mRNA	up
NR0B2	mRNA	down
NR2F1	mRNA	down
NR2F6	mRNA	up
NR3C2	mRNA	down
NR4A3	mRNA	down
NRARP	mRNA	up
NSUN2	mRNA	up
NUP155	mRNA	up
NUPR1	mRNA	down
OAS3	mRNA	up
OLFM1	mRNA	down
OLR1	mRNA	down
OMD	mRNA	down
OPLAH	mRNA	up
OPN3	mRNA	up
OR7E38P	lncRNA	up
OTX1	mRNA	up
OVOL1	mRNA	up
P3H4	mRNA	up
PACSIN3	mRNA	up
PAFAH1B3	mRNA	up
PAK1IP1	mRNA	up
PALMD	mRNA	down
PAM	mRNA	down
PAMR1	mRNA	down
PAQR8	mRNA	down
PARM1	mRNA	down
PAX9	mRNA	up
PBXIP1	mRNA	down
PCAT6	lncRNA	up
PDE4B	mRNA	down
PDIA3	mRNA	up
PDIA4	mRNA	up
PDK4	mRNA	down
PDLIM3	mRNA	down
PDZD2	mRNA	down
PDZRN3	mRNA	down
PEBP4	mRNA	down
PER3	mRNA	down
PERP	mRNA	up
PFDN2	mRNA	up
PFKP	mRNA	up
PGD	mRNA	up
PGM5	mRNA	down
PHACTR1	mRNA	down
PHLDA2	mRNA	up
PHYHD1	mRNA	down
PI3	mRNA	up
PID1	mRNA	down
PIGR	mRNA	down
PIP5K1B	mRNA	down
PITX1	mRNA	up
PKI55	lncRNA	down
PKM	mRNA	up
PKMP3	lncRNA	down
PKP2	mRNA	up
PKP3	mRNA	up
PLA1A	mRNA	down
PLA2G1B	mRNA	down
PLA2G4F	mRNA	down
PLAC8	mRNA	down
PLEK2	mRNA	up
PLEKHA4	mRNA	down
PLEKHB1	mRNA	down
PLEKHG2	mRNA	up
PLEKHG6	mRNA	up
PLLP	mRNA	down
PLOD2	mRNA	up
PLXNA2	mRNA	down
PMP22	mRNA	down
POLD2	mRNA	up
PPFIBP2	mRNA	down
PPIF	mRNA	up
PPP1R12B	mRNA	down
PPP1R14B	mRNA	up
PPP1R14BP3	lncRNA	up
PPP1R3C	mRNA	down
PRDM16	mRNA	down
PRKAR2B	mRNA	down
PRNP	mRNA	down
PROS1	mRNA	down
PRR15L	mRNA	down
PRSS12	mRNA	down
PRSS3	mRNA	up
PSMB5	mRNA	up
PSMG3	mRNA	up
PTCSC3	lncRNA	down
PTGFR	mRNA	down
PTGR1	mRNA	up
PTP4A1	mRNA	up
PTPN13	mRNA	down
PTPRH	mRNA	up
PUS1	mRNA	up
PVR	mRNA	up
PVRL3	mRNA	down
PXMP4	mRNA	down
PYCR1	mRNA	up
PYGL	mRNA	up
RAB10	mRNA	up
RAC3	mRNA	up
RANGAP1	mRNA	up
RAP1GAP	mRNA	down
RARRES3	mRNA	down
RASGRF1	mRNA	down
RASGRP1	mRNA	down
RASL11A	mRNA	down
RBPMS2	mRNA	up
RCAN2	mRNA	down
RCOR2	mRNA	up
RENBP	mRNA	down
REPS2	mRNA	down
RETN	mRNA	down
RFTN1	mRNA	down
RGAG4	mRNA	down
RGL1	mRNA	down
RGS16	mRNA	down
RGS20	mRNA	up
RHOV	mRNA	up
RHPN2	mRNA	up
RN7SKP51	ncRNA	down
RN7SL8P	ncRNA	down
RNA5SP18	rRNA	up
RNASE1	mRNA	down
RNF130	mRNA	down
RNF145	mRNA	down
RNU2-27P	ncRNA	up
RNU5B-2P	ncRNA	down
RNU6-247P	ncRNA	down
RNU6-322P	ncRNA	down
RNU6-529P	ncRNA	down
RNU6ATAC18P	ncRNA	down
ROS1	mRNA	down
RP1-186E20.1	lncRNA	down
RP11-1148L6.5	lncRNA	down
RP11-123B3.2	lncRNA	up
RP11-1246C19.1	lncRNA	up
RP11-132A1.4	lncRNA	up
RP11-164J13.1	lncRNA	down
RP11-16K12.1	lncRNA	down
RP11-21L23.2	lncRNA	up
RP11-21L23.3	lncRNA	up
RP11-24F11.2	lncRNA	down
RP11-259K15.2	lncRNA	down
RP11-284N8.3	lncRNA	down
RP11-295G20.2	lncRNA	up
RP11-302F12.1	lncRNA	down
RP11-325F22.2	lncRNA	down
RP11-334C17.6	lncRNA	up
RP11-336A10.5	lncRNA	up
RP11-344B5.2	lncRNA	down
RP11-345P4.9	lncRNA	down
RP11-357D18.1	lncRNA	down
RP11-35N6.1	mRNA	down
RP11-367G6.3	lncRNA	down
RP11-378A13.1	lncRNA	down
RP11-401P9.4	lncRNA	down
RP11-417L19.6	lncRNA	up
RP11-434I12.3	lncRNA	up
RP11-443P15.2	lncRNA	up
RP11-462G12.1	lncRNA	down
RP11-465N4.4	lncRNA	up
RP11-476D10.1	lncRNA	down
RP11-47L3.1	lncRNA	down
RP11-481H12.1	lncRNA	down
RP11-498C9.12	lncRNA	up
RP11-528A4.2	lncRNA	down
RP11-539E17.5	lncRNA	up
RP11-541N10.3	lncRNA	down
RP11-548P2.2	lncRNA	down
RP11-589P10.5	lncRNA	down
RP11-635O16.2	lncRNA	down
RP11-680F8.1	lncRNA	up
RP11-686D22.4	lncRNA	down
RP11-686D22.7	lncRNA	down
RP11-714G18.1	lncRNA	down
RP11-739N20.2	lncRNA	up
RP11-756P10.6	lncRNA	up
RP11-783K16.5	lncRNA	up
RP11-789C1.1	lncRNA	down
RP11-806H10.4	lncRNA	up
RP11-818F20.5	lncRNA	up
RP11-832A4.7	lncRNA	down
RP11-867G23.8	lncRNA	down
RP11-876N24.5	lncRNA	down
RP11-93B14.10	lncRNA	down
RP11-93B14.9	lncRNA	down
RP13-463N16.6	lncRNA	up
RP3-325F22.5	lncRNA	up
RP3-342P20.2	lncRNA	down
RP3-395M20.8	lncRNA	down
RP3-407E4.2	lncRNA	up
RP3-449M8.6	lncRNA	down
RP3-449M8.9	lncRNA	down
RP3-460G2.2	lncRNA	down
RP3-512B11.3	lncRNA	up
RP3-523K23.2	lncRNA	up
RP4-782L23.1	lncRNA	down
RP4-798A17.5	lncRNA	down
RP5-1091N2.9	lncRNA	down
RP5-1120P11.1	lncRNA	up
RP5-839B4.8	lncRNA	down
RP5-967N21.11	lncRNA	up
RP6-65G23.3	lncRNA	up
RP9P	lncRNA	up
RPL26P30	lncRNA	down
RPS6KA2	mRNA	down
RRAD	mRNA	down
RRM2B	mRNA	down
RRN3P1	lncRNA	down
RRS1	mRNA	up
RTKN	mRNA	up
S100A16	mRNA	up
S100A2	mRNA	up
S100P	mRNA	up
SAC3D1	mRNA	up
SATB1	mRNA	down
SCARA3	mRNA	down
SCARF1	mRNA	down
SCD	mRNA	up
SCGB3A1	mRNA	down
SCGB3A2	mRNA	down
SCNN1B	mRNA	down
SCRIB	mRNA	up
SCTR	mRNA	down
SDC2	mRNA	down
SDC3	mRNA	down
SEC14L6	mRNA	down
SEC61G	mRNA	up
SELENBP1	mRNA	down
SEMA4A	mRNA	down
SEMA4B	mRNA	up
SEPP1	mRNA	down
SEPW1	mRNA	down
SERPINA1	mRNA	down
SERPINB5	mRNA	up
SESN3	mRNA	down
SFN	mRNA	up
SFTA1P	lncRNA	down
SFTA3	mRNA	down
SFTPA1	mRNA	down
SFTPA2	mRNA	down
SFTPB	mRNA	down
SFTPD	mRNA	down
SGK1	mRNA	down
SHC3	mRNA	down
SHE	mRNA	down
SHH	mRNA	down
SHISA3	mRNA	down
SHMT2	mRNA	up
SIGLEC17P	lncRNA	down
SLC15A1	mRNA	up
SLC15A2	mRNA	down
SLC16A14	mRNA	up
SLC16A3	mRNA	up
SLC1A1	mRNA	down
SLC1A5	mRNA	up
SLC22A3	mRNA	down
SLC25A10	mRNA	up
SLC26A9	mRNA	down
SLC34A2	mRNA	down
SLC39A14	mRNA	up
SLC39A8	mRNA	down
SLC3A2	mRNA	up
SLC40A1	mRNA	down
SLC47A1	mRNA	down
SLC4A4	mRNA	down
SLC52A2	mRNA	up
SLC6A8	mRNA	up
SLC7A11	mRNA	up
SLC7A8	mRNA	down
SLCO2A1	mRNA	down
SLCO3A1	mRNA	down
SLCO4C1	mRNA	down
SLPI	mRNA	down
SMARCA2	mRNA	down
SMARCD3	mRNA	down
SMOX	mRNA	up
SNED1	mRNA	down
SNHG17	lncRNA	up
SNORD14E	ncRNA	up
SNRPN	mRNA	down
SNX25	mRNA	down
SNX29	mRNA	down
SNX30	mRNA	down
SOCS1	mRNA	down
SORBS2	mRNA	down
SOX15	mRNA	up
SP6	mRNA	up
SPHK1	mRNA	up
SPINK5	mRNA	down
SPOCK2	mRNA	down
SPRY1	mRNA	down
SPTLC3	mRNA	down
SQLE	mRNA	up
SRGN	mRNA	down
SRXN1	mRNA	up
SSBP2	mRNA	down
SSPN	mRNA	down
ST3GAL5	mRNA	down
ST3GAL5-AS1	lncRNA	down
ST3GAL6	mRNA	down
ST6GAL1	mRNA	down
STC1	mRNA	up
STC2	mRNA	up
STK32A	mRNA	down
STRIP2	mRNA	up
STS	mRNA	down
STXBP1	mRNA	down
STYK1	mRNA	up
SULT2B1	mRNA	up
SUSD2	mRNA	down
SUSD6	mRNA	down
TAPT1	mRNA	down
TARS	mRNA	up
TBRG4	mRNA	up
TBXAS1	mRNA	down
TCF4	mRNA	down
TEF	mRNA	down
TFAP2A	mRNA	up
TFG	mRNA	up
TGFBR2	mRNA	down
TGFBR3	mRNA	down
THBD	mRNA	down
TLCD1	mRNA	up
TLR10	mRNA	down
TLR2	mRNA	down
TLR3	mRNA	down
TLR5	mRNA	down
TMEM108	mRNA	down
TMEM125	mRNA	down
TMEM130	mRNA	down
TMEM159	mRNA	down
TMEM163	mRNA	down
TMEM184A	mRNA	up
TMEM243	mRNA	down
TMEM37	mRNA	down
TMEM79	mRNA	up
TMEM98	mRNA	down
TMPRSS2	mRNA	down
TMSB4XP1	lncRNA	down
TMX4	mRNA	down
TNFRSF19	mRNA	down
TNFSF13	mRNA	down
TNFSF15	mRNA	down
TNS4	mRNA	up
TOB2P1	lncRNA	up
TOMM40	mRNA	up
TOX	mRNA	down
TPI1P1	lncRNA	up
TPPP	mRNA	down
TPSAB1	mRNA	down
TPSB2	mRNA	down
TRAF4	mRNA	up
TREML3P	lncRNA	up
TRIB3	mRNA	up
TRIM16	mRNA	up
TRIM16L	mRNA	up
TRIM31	mRNA	up
TSC22D3	mRNA	down
TSKU	mRNA	up
TSPAN2	mRNA	down
TSPAN4	mRNA	down
TSPEAR-AS1	lncRNA	down
TTC3P1	lncRNA	down
TTYH2	mRNA	down
TUBA1A	mRNA	down
TUFT1	mRNA	up
TXN	mRNA	up
TXNDC11	mRNA	down
TXNDC15	mRNA	down
UBE2V2	mRNA	up
UBL3	mRNA	down
UGDH	mRNA	up
UST	mRNA	down
VAMP2	mRNA	down
VARS	mRNA	up
VEGFA	mRNA	up
VEPH1	mRNA	down
VIM	mRNA	down
VNN2	mRNA	down
VSIG2	mRNA	down
VSTM4	mRNA	down
VWA2	mRNA	down
VWA5A	mRNA	down
WBSCR17	mRNA	down
WDFY4	mRNA	down
WDR34	mRNA	up
WFDC2	mRNA	down
WIF1	mRNA	down
WLS	mRNA	down
WNT11	mRNA	down
YBX2	mRNA	up
YDJC	mRNA	up
YWHAZ	mRNA	up
ZBTB12	mRNA	up
ZBTB16	mRNA	down
ZBTB18	mRNA	down
ZBTB7C	mRNA	down
ZFP36L2	mRNA	down
ZNF204P	lncRNA	down
ZNF385B	mRNA	down
ZNF608	mRNA	down
ZP3	mRNA	up

## Sheet: yellow
Gene Symbol	Biotype	style
ABI3	mRNA	down
AC011899.9	lncRNA	down
AC147651.4	lncRNA	down
ACP5	mRNA	down
ADGRE4P	lncRNA	down
AGRP	mRNA	down
ALOX5	mRNA	down
ALOX5AP	mRNA	down
AMICA1	mRNA	down
AP002954.4	lncRNA	down
APOBR	mRNA	down
APOL4	mRNA	down
ARRDC4	mRNA	down
ATP6V0D2	mRNA	down
C19orf38	mRNA	down
C1QA	mRNA	down
C1QB	mRNA	down
C1QC	mRNA	down
C1orf162	mRNA	down
C3AR1	mRNA	down
C5AR1	mRNA	down
CCL13	mRNA	down
CCL18	mRNA	down
CCL23	mRNA	down
CCR1	mRNA	down
CCRL2	mRNA	down
CD14	mRNA	down
CD300C	mRNA	down
CD300LF	mRNA	down
CD33	mRNA	down
CD4	mRNA	down
CD74	mRNA	down
CD86	mRNA	down
CHIT1	mRNA	down
CLEC12A	mRNA	down
CLEC5A	mRNA	down
COLEC12	mRNA	down
CSF1R	mRNA	down
CSF2RA	mRNA	down
CTSZ	mRNA	down
CYTH4	mRNA	down
DAB2	mRNA	down
DCSTAMP	mRNA	down
DNAJC5B	mRNA	down
DOK2	mRNA	down
DOK3	mRNA	down
DPEP2	mRNA	down
F13A1	mRNA	down
FCER1G	mRNA	down
FCGR2A	mRNA	down
FCN1	mRNA	down
FERMT3	mRNA	down
FGD2	mRNA	down
FGR	mRNA	down
FOLR2	mRNA	down
FPR1	mRNA	down
GLIPR2	mRNA	down
GPNMB	mRNA	down
HAVCR2	mRNA	down
HCK	mRNA	down
HCST	mRNA	down
HK3	mRNA	down
HLA-DPA1	mRNA	down
HLA-DPB1	mRNA	down
HS3ST2	mRNA	down
ITGAM	mRNA	down
ITGAX	mRNA	down
ITGB2	mRNA	down
KCNAB2	mRNA	down
LAIR1	mRNA	down
LAPTM5	mRNA	down
LINC01272	lncRNA	down
LIPA	mRNA	down
LRRC25	mRNA	down
LSP1	mRNA	down
LYZ	mRNA	down
MARCO	mRNA	down
MATK	mRNA	down
MNDA	mRNA	down
MPP1	mRNA	down
MRC1	mRNA	down
MS4A4A	mRNA	down
MS4A7	mRNA	down
MSR1	mRNA	down
MYO1F	mRNA	down
NCF2	mRNA	down
NCF4	mRNA	down
NFAM1	mRNA	down
NLRC4	mRNA	down
NPL	mRNA	down
NRROS	mRNA	down
OSCAR	mRNA	down
PARVG	mRNA	down
PIK3R5	mRNA	down
PIK3R6	mRNA	down
PILRA	mRNA	down
PLEKHO2	mRNA	down
PPM1M	mRNA	down
PRAM1	mRNA	down
PTPRO	mRNA	down
RASGRP4	mRNA	down
RP11-598F7.3	lncRNA	down
RP11-67C2.2	lncRNA	down
RP11-750H9.5	lncRNA	down
RP11-848P1.3	lncRNA	down
RP6-159A1.4	lncRNA	down
SELPLG	mRNA	down
SIGLEC1	mRNA	down
SIGLEC14	mRNA	down
SIGLEC7	mRNA	down
SIGLEC9	mRNA	down
SIRPA	mRNA	down
SIRPB2	mRNA	down
SLAMF8	mRNA	down
SLC15A3	mRNA	down
SLC37A2	mRNA	down
SLC7A7	mRNA	down
SLCO2B1	mRNA	down
SPI1	mRNA	down
SPN	mRNA	down
STAC	mRNA	down
THEMIS2	mRNA	down
TNFSF12	mRNA	down
TRPV2	mRNA	down
VSIG4	mRNA	down
WAS	mRNA	down

## Sheet: red
Gene Symbol	Biotype	style
AC007566.10	lncRNA	down
AC009120.3	lncRNA	down
AC009120.5	lncRNA	down
AC009120.6	lncRNA	down
AC013275.2	lncRNA	down
AC116366.6	lncRNA	down
ANKDD1B	mRNA	down
ANKRD44	mRNA	down
ATP13A4	mRNA	down
CLEC2D	mRNA	down
CLK4	mRNA	down
CREBRF	mRNA	down
CTC-429P9.1	lncRNA	down
CTC-429P9.2	lncRNA	down
CTC-429P9.3	lncRNA	down
CTC-429P9.5	lncRNA	down
CTC-559E9.5	lncRNA	down
CTD-2235C13.1	lncRNA	down
CTD-2353F22.1	lncRNA	down
CYLD	mRNA	down
DOCK10	mRNA	down
EP300-AS1	lncRNA	down
FAM13B	mRNA	down
FAT4	mRNA	down
FCGR2C	lncRNA	down
FNIP2	mRNA	down
GPRASP1	mRNA	down
GSAP	mRNA	down
GUCY1A3	mRNA	down
HMCN1	mRNA	down
HSPE1P18	lncRNA	down
IGIP	mRNA	down
IL6ST	mRNA	down
KB-1507C5.4	lncRNA	down
LAMA2	mRNA	down
LINC00861	lncRNA	down
MEF2C	mRNA	down
MIR186	ncRNA	down
MIR3671	ncRNA	down
MIR5581	ncRNA	down
MIR568	ncRNA	down
MIRLET7D	ncRNA	down
NFIA	mRNA	down
OGFRL1	mRNA	down
PAXIP1-AS2	lncRNA	down
PDE5A	mRNA	down
PIK3R1	mRNA	down
PJA2	mRNA	down
PLEKHH2	mRNA	down
PRDM6	mRNA	down
PREX2	mRNA	down
RASGEF1B	mRNA	down
RBMS3	mRNA	down
RN7SKP70	ncRNA	down
RNF144B	mRNA	down
RNU4-62P	ncRNA	down
RP11-1094M14.5	lncRNA	down
RP11-118B22.4	lncRNA	down
RP11-1277A3.1	lncRNA	down
RP11-1277A3.2	lncRNA	down
RP11-136H19.1	lncRNA	down
RP11-164O23.8	lncRNA	down
RP11-196G11.5	lncRNA	down
RP11-23J18.1	lncRNA	down
RP11-264I13.2	lncRNA	down
RP11-325K4.2	lncRNA	down
RP11-325K4.3	lncRNA	down
RP11-347C18.3	lncRNA	down
RP11-403P17.6	lncRNA	down
RP11-456K23.1	lncRNA	down
RP11-553L6.5	lncRNA	down
RP11-588K22.2	lncRNA	down
RP11-5C23.1	lncRNA	down
RP11-686D22.10	lncRNA	down
RP11-713N11.6	lncRNA	down
RP13-36G14.4	lncRNA	down
RP4-631H13.6	lncRNA	down
RPL32P1	lncRNA	down
SH3BP5-AS1	lncRNA	down
SLC16A7	mRNA	down
SYNE1	mRNA	down
TACC1	mRNA	down
TP53INP1	mRNA	down
VN1R83P	lncRNA	down
ZEB2	mRNA	down
ZMAT1	mRNA	down

## Sheet: greenyellow
Gene Symbol	Biotype	style
A2M	mRNA	down
AC109642.1	lncRNA	down
ADAMTS8	mRNA	down
ANGPT1	mRNA	down
AOC3	mRNA	down
ARHGAP31	mRNA	down
C1QTNF7	mRNA	down
CASS4	mRNA	down
CBX7	mRNA	down
CD302	mRNA	down
CYBRD1	mRNA	down
FHL1	mRNA	down
FMO2	mRNA	down
GDF10	mRNA	down
ITGA8	mRNA	down
ITGA9	mRNA	down
LINC00968	lncRNA	down
MAMDC2	mRNA	down
MFAP4	mRNA	down
MGP	mRNA	down
MMRN1	mRNA	down
MS4A2	mRNA	down
NFIX	mRNA	down
RAI2	mRNA	down
RASL12	mRNA	down
ROBO2	mRNA	down
SCN4B	mRNA	down
SCN7A	mRNA	down
SEPT4	mRNA	down
SESN1	mRNA	down
SGCA	mRNA	down
SHROOM4	mRNA	down
SPARCL1	mRNA	down
TBX4	mRNA	down
TBX5	mRNA	down
TBX5-AS1	lncRNA	down
TCF21	mRNA	down
TMEM204	mRNA	down
TNS1	mRNA	down
TNS2	mRNA	down
TXNIP	mRNA	down

## Sheet: brown
Gene Symbol	Biotype	style
AC007386.4	lncRNA	down
AC103563.5	lncRNA	down
AC104699.1	lncRNA	down
AC244250.2	ncRNA	down
AC244250.4	ncRNA	down
AC245028.1	ncRNA	down
AMPD1	mRNA	down
ANKRD36BP2	lncRNA	down
CPNE5	mRNA	down
DERL3	mRNA	down
FAM46C	mRNA	down
FCRL5	mRNA	down
HERPUD1	mRNA	down
IGHA1	mRNA	down
IGHA2	mRNA	down
IGHD3-9	mRNA	down
IGHJ1	mRNA	down
IGHJ2	mRNA	down
IGHJ3	mRNA	down
IGHM	mRNA	down
IGHV1-12	lncRNA	down
IGHV1-17	lncRNA	down
IGHV1-18	mRNA	down
IGHV1-45	mRNA	down
IGHV1-46	mRNA	down
IGHV1-69-2	mRNA	down
IGHV1OR15-2	lncRNA	down
IGHV1OR15-9	mRNA	down
IGHV1OR16-1	lncRNA	down
IGHV1OR16-3	lncRNA	down
IGHV1OR21-1	mRNA	down
IGHV2-5	mRNA	down
IGHV3-11	mRNA	down
IGHV3-13	mRNA	down
IGHV3-15	mRNA	down
IGHV3-19	lncRNA	down
IGHV3-20	mRNA	down
IGHV3-21	mRNA	down
IGHV3-22	lncRNA	down
IGHV3-23	mRNA	down
IGHV3-25	lncRNA	down
IGHV3-33	mRNA	down
IGHV3-35	mRNA	down
IGHV3-38	mRNA	down
IGHV3-41	lncRNA	down
IGHV3-42	lncRNA	down
IGHV3-43	mRNA	down
IGHV3-47	lncRNA	down
IGHV3-49	mRNA	down
IGHV3-52	lncRNA	down
IGHV3-53	mRNA	down
IGHV3-6	lncRNA	down
IGHV3-60	lncRNA	down
IGHV3-62	lncRNA	down
IGHV3-7	mRNA	down
IGHV3-71	lncRNA	down
IGHV3-74	mRNA	down
IGHV3-76	lncRNA	down
IGHV3OR15-7	mRNA	down
IGHV3OR16-13	mRNA	down
IGHV3OR16-6	lncRNA	down
IGHV3OR16-8	mRNA	down
IGHV3OR16-9	mRNA	down
IGHV4-28	mRNA	down
IGHV4-4	mRNA	down
IGHV4-55	lncRNA	down
IGHV4-59	mRNA	down
IGHV4-61	mRNA	down
IGHV5-51	mRNA	down
IGHV5-78	lncRNA	down
IGHV6-1	mRNA	down
IGHV7-27	lncRNA	down
IGHV7-56	lncRNA	down
IGHV7-81	mRNA	down
IGKC	mRNA	down
IGKJ5	mRNA	down
IGKV1-12	mRNA	down
IGKV1-16	mRNA	down
IGKV1-17	mRNA	down
IGKV1-27	mRNA	down
IGKV1-33	mRNA	down
IGKV1-39	mRNA	down
IGKV1-5	mRNA	down
IGKV1-6	mRNA	down
IGKV1-8	mRNA	down
IGKV1-9	mRNA	down
IGKV1D-33	mRNA	down
IGKV1D-39	mRNA	down
IGKV1D-43	mRNA	down
IGKV1D-8	mRNA	down
IGKV1OR10-1	lncRNA	down
IGKV1OR2-108	mRNA	down
IGKV1OR2-11	lncRNA	down
IGKV1OR2-3	lncRNA	down
IGKV1OR2-6	lncRNA	down
IGKV1OR22-5	lncRNA	down
IGKV2-26	lncRNA	down
IGKV2-28	mRNA	down
IGKV2-30	mRNA	down
IGKV2D-24	mRNA	down
IGKV2OR2-1	lncRNA	down
IGKV2OR22-4	lncRNA	down
IGKV3-11	mRNA	down
IGKV3-15	mRNA	down
IGKV3-20	mRNA	down
IGKV3-7	mRNA	down
IGKV3D-11	mRNA	down
IGKV3D-15	mRNA	down
IGKV3D-20	mRNA	down
IGKV3OR2-268	mRNA	down
IGKV4-1	mRNA	down
IGKV6-21	mRNA	down
IGKV6D-21	mRNA	down
IGLC2	mRNA	down
IGLC6	lncRNA	down
IGLC7	mRNA	down
IGLJ2	mRNA	down
IGLL5	mRNA	down
IGLV1-36	mRNA	down
IGLV1-40	mRNA	down
IGLV1-44	mRNA	down
IGLV1-47	mRNA	down
IGLV1-50	mRNA	down
IGLV1-51	mRNA	down
IGLV2-11	mRNA	down
IGLV2-14	mRNA	down
IGLV2-18	mRNA	down
IGLV2-23	mRNA	down
IGLV2-28	lncRNA	down
IGLV2-34	lncRNA	down
IGLV2-5	lncRNA	down
IGLV2-8	mRNA	down
IGLV3-10	mRNA	down
IGLV3-13	lncRNA	down
IGLV3-19	mRNA	down
IGLV3-25	mRNA	down
IGLV3-27	mRNA	down
IGLV4-69	mRNA	down
IGLV6-57	mRNA	down
IGLV7-43	mRNA	down
IGLV7-46	mRNA	down
IGLV8-61	mRNA	down
IRF4	mRNA	down
KIAA0125	lncRNA	down
LAX1	mRNA	down
LINC00582	lncRNA	down
LL22NC03-88E1.18	lncRNA	down
MEI1	mRNA	down
MZB1	mRNA	down
PIM2	mRNA	down
PNOC	mRNA	down
POU2AF1	mRNA	down
RP11-1166P10.8	lncRNA	down
RP11-170L3.7	lncRNA	down
RP11-290F5.1	lncRNA	down
RP11-294C11.2	mRNA	down
RP11-295P22.2	lncRNA	down
RP11-812E19.9	mRNA	down
SLAMF7	mRNA	down
TMEM47	mRNA	down
TNFRSF17	mRNA	down

## Sheet: purple
Gene Symbol	Biotype	style
AIF1	mRNA	down
APOC1	mRNA	down
B2M	mRNA	down
BCL2A1	mRNA	down
C10orf128	mRNA	down
C1orf54	mRNA	down
CARD16	mRNA	down
CARD8-AS1	lncRNA	down
CASP1	mRNA	down
CD1C	mRNA	down
CD52	mRNA	down
CLEC4A	mRNA	down
COX7A1	mRNA	down
CTSK	mRNA	down
EVI2A	mRNA	down
FCER1A	mRNA	down
FCGR1C	lncRNA	down
FCGR2B	mRNA	down
GIMAP2	mRNA	down
GMFG	mRNA	down
GPR34	mRNA	down
HLA-DMB	mRNA	down
HLA-DRA	mRNA	down
HLA-DRB1	mRNA	down
HPGDS	mRNA	down
LAT2	mRNA	down
LINC01094	lncRNA	down
LINC01150	lncRNA	down
LST1	mRNA	down
LY86	mRNA	down
LY96	mRNA	down
MS4A6A	mRNA	down
P2RY12	mRNA	down
RGS18	mRNA	down
RNASE6	mRNA	down
RP11-693N9.2	lncRNA	down
RP5-899E9.1	lncRNA	down
S100B	mRNA	down
TMSB4X	mRNA	down
TNFAIP8L2	mRNA	down
TREM2	mRNA	down
TYROBP	mRNA	down

[truncated: 4 more sheets: turquoise, tan, magenta, pink]
