# Supplementary material for: Identification of a ceRNA Network in Lung Adenocarcinoma Based on Integration Analysis of Tumor-Associated Macrophage Signature Genes
Source: Front Cell Dev Biol. 2021 Mar 2;9:629941. doi: 10.3389/fcell.2021.629941 (PMC7960670; doi:10.3389/fcell.2021.629941)
Supplement: Supplementary file 5 [file Table_4.XLSX]

## Sheet: Survival analysis in TCGA
Survival analysis results of ceRNA genes in TCGA
Green means good prognosis		Red means poor prognosis
lncRNAs					miRNAs					mRNAs
Sample_title	P_value	HR	CI	prognosis	Sample_title	P_value	HR	CI	prognosis	Sample_title	P_value	HR	CI	prognosis
RP6-159A1.4	0.0002	0.406	0.249 - 0.661	good	hsa-miR-29b-2-5p	0.0003	0.417	0.257 - 0.676	good	FCRL2	0.0002	0.411	0.254 - 0.667	good
RP11-750H9.5	0.0003	0.418	0.258 - 0.677	good	hsa-miR-4709-3p	0.0006	0.445	0.277 - 0.716	good	SKA3	0.0004	2.308	1.433 - 3.717	poor
RP11-876N24.4	0.0009	0.454	0.281 - 0.732	good	hsa-miR-133a-3p	0.0029	0.49	0.303 - 0.791	good	CCNA2	0.0005	2.279	1.411 - 3.681	poor
HLA-DQB1-AS1	0.0015	0.468	0.29 - 0.756	good	hsa-miR-217	0.0049	0.511	0.318 - 0.823	good	HJURP	0.0007	2.227	1.382 - 3.589	poor
LINC01480	0.0028	0.487	0.301 - 0.788	good	hsa-miR-195-5p	0.0218	0.585	0.368 - 0.93	good	PAX5	0.0008	0.449	0.277 - 0.727	good
CTD-2510F5.4	0.0032	2.013	1.253 - 3.235	poor	hsa-miR-150-5p	0.0437	0.625	0.394 - 0.991	good	SLC2A1	0.0008	2.241	1.384 - 3.628	poor
AC011899.9	0.0046	0.51	0.318 - 0.82	good	hsa-miR-9-5p	0.0498	1.584	0.996 - 2.517	poor	INCENP	0.001	2.176	1.355 - 3.494	poor
KIAA0125	0.0047	0.511	0.318 - 0.821	good	hsa-miR-29c-3p	0.066	0.651	0.41 - 1.032	none	BRCA1	0.0011	2.159	1.347 - 3.46	poor
AC006129.2	0.0048	0.509	0.315 - 0.821	good	hsa-let-7c-5p	0.0942	0.677	0.427 - 1.072	none	CENPK	0.0011	2.196	1.356 - 3.555	poor
RP11-598F7.3	0.0054	0.517	0.322 - 0.83	good	hsa-miR-146a-5p	0.1646	0.724	0.458 - 1.144	none	NUSAP1	0.0011	2.16	1.344 - 3.471	poor
LINC00324	0.0061	0.521	0.324 - 0.837	good	hsa-miR-196b-5p	0.1806	1.369	0.863 - 2.171	none	SH3BGRL	0.0011	0.454	0.279 - 0.74	good
RP5-1171I10.5	0.0061	0.523	0.327 - 0.838	good	hsa-miR-1247-3p	0.2027	1.347	0.85 - 2.133	none	BORA	0.0015	2.138	1.323 - 3.456	poor
LINC00892	0.0062	0.502	0.311 - 0.811	good	hsa-miR-34b-3p	0.207	0.745	0.47 - 1.179	none	PSMD11	0.0015	2.106	1.316 - 3.369	poor
RP11-67C2.2	0.0066	0.525	0.327 - 0.843	good	hsa-miR-148a-5p	0.2788	0.777	0.492 - 1.228	none	FBXO45	0.0018	2.103	1.305 - 3.39	poor
RP11-303E16.2	0.0076	1.878	1.174 - 3.004	poor	hsa-miR-30c-2-3p	0.3182	0.791	0.499 - 1.254	none	CENPA	0.002	2.084	1.296 - 3.352	poor
ADGRE4P	0.008	0.532	0.331 - 0.855	good	hsa-miR-503-5p	0.547	1.151	0.729 - 1.817	none	E2F7	0.0022	2.05	1.283 - 3.276	poor
RP11-1334A24.6	0.0101	0.542	0.338 - 0.871	good	hsa-miR-18a-5p	0.6257	1.121	0.709 - 1.771	none	MIS18A	0.0023	2.049	1.281 - 3.28	poor
ANKRD36BP2	0.012	0.545	0.337 - 0.881	good	hsa-miR-30a-3p	0.685	0.91	0.576 - 1.438	none	HMGA1	0.0024	2.044	1.275 - 3.275	poor
GGTA1P	0.0125	0.555	0.347 - 0.887	good	hsa-miR-210-3p	0.7122	0.917	0.58 - 1.45	none	NDC1	0.0025	2.057	1.276 - 3.317	poor
AF131215.2	0.016	0.565	0.353 - 0.905	good	hsa-miR-147b	0.7322	1.083	0.685 - 1.712	none	GAB3	0.0026	0.487	0.302 - 0.786	good
GVINP1	0.0174	0.569	0.356 - 0.911	good	hsa-miR-34c-5p	0.8006	0.943	0.596 - 1.491	none	IL16	0.0027	0.491	0.306 - 0.789	good
PCED1B-AS1	0.0191	0.573	0.358 - 0.919	good	hsa-miR-184	0.8922	0.969	0.614 - 1.529	none	MYBL2	0.0028	2.035	1.265 - 3.274	poor
RP11-424C20.2	0.0204	1.722	1.082 - 2.741	poor	hsa-miR-33b-5p	0.922	0.977	0.616 - 1.551	none	YWHAG	0.0028	2.019	1.261 - 3.233	poor
RP11-259N19.1	0.0211	1.711	1.078 - 2.714	poor						IGF2BP3	0.0029	2.008	1.257 - 3.208	poor
TYMSOS	0.0218	1.718	1.076 - 2.745	poor						GINS4	0.0032	2.004	1.252 - 3.207	poor
AC079767.4	0.022	0.581	0.363 - 0.93	good						SPN	0.0032	0.498	0.31 - 0.799	good
RP11-564D11.3	0.0299	1.668	1.046 - 2.66	poor						POLQ	0.0034	1.995	1.246 - 3.195	poor
LINC00926	0.0352	0.6	0.371 - 0.97	good						LMNB2	0.0037	1.98	1.237 - 3.17	poor
LINC01215	0.0372	0.607	0.378 - 0.975	good						CD28	0.004	0.505	0.314 - 0.811	good
RP11-443B20.1	0.0416	1.612	1.014 - 2.564	poor						NCAPG	0.0042	1.964	1.227 - 3.146	poor
MIR155HG	0.042	0.619	0.388 - 0.987	good						SPC24	0.0044	1.952	1.222 - 3.116	poor
RP11-1166P10.8	0.0441	0.625	0.394 - 0.991	good						CDC6	0.0048	1.942	1.215 - 3.105	poor
TRG-AS1	0.0447	0.619	0.386 - 0.993	good						AUNIP	0.0052	1.938	1.209 - 3.106	poor
IGKV1OR2-11	0.0459	0.626	0.393 - 0.995	good						GNG7	0.0062	0.524	0.327 - 0.839	good
LINC00582	0.054	0.637	0.401 - 1.011	none						TMPO	0.0065	1.914	1.19 - 3.08	poor
LLNLR-470E3.1	0.054	0.637	0.401 - 1.012	none						TIMELESS	0.0069	1.879	1.18 - 2.992	poor
AC007386.4	0.0583	0.642	0.405 - 1.019	none						DENR	0.0076	1.867	1.172 - 2.976	poor
NAPSB	0.0603	0.641	0.401 - 1.023	none						PAICS	0.0076	1.896	1.175 - 3.057	poor
RP11-1094M14.8	0.0876	0.667	0.418 - 1.065	none						CDCA5	0.0077	1.874	1.172 - 2.997	poor
TMPO-AS1	0.0882	1.496	0.939 - 2.384	none						TCF19	0.0077	1.87	1.171 - 2.986	poor
IGHV3-22	0.1068	0.685	0.432 - 1.088	none						PIK3IP1	0.0081	0.535	0.334 - 0.857	good
NPM1P25	0.1077	0.687	0.434 - 1.088	none						KPNB1	0.0082	1.86	1.166 - 2.969	poor
IGLC6	0.1183	0.694	0.438 - 1.1	none						STIL	0.0088	1.848	1.159 - 2.948	poor
RP11-473M20.9	0.1187	0.693	0.436 - 1.102	none						IRF4	0.0089	0.539	0.336 - 0.862	good
IGHV3-19	0.1236	0.699	0.442 - 1.105	none						SAPCD2	0.009	1.856	1.159 - 2.973	poor
IGHV3-62	0.1606	0.721	0.456 - 1.141	none						H2AFX	0.0092	1.85	1.156 - 2.96	poor
CCDC150P1	0.1836	1.363	0.862 - 2.154	none						DARS2	0.0101	1.849	1.149 - 2.974	poor
RP11-848P1.3	0.189	0.734	0.462 - 1.167	none						CENPF	0.0104	1.822	1.144 - 2.902	poor
IGKV1OR2-3	0.201	0.741	0.467 - 1.175	none						WDR76	0.0109	1.826	1.141 - 2.921	poor
LINC00996	0.2112	0.743	0.466 - 1.185	none						XRCC2	0.0113	1.808	1.136 - 2.877	poor
RP11-290F5.1	0.2161	0.748	0.472 - 1.186	none						PRR11	0.0114	1.815	1.136 - 2.9	poor
IGHV3-71	0.2191	0.75	0.473 - 1.188	none						RAD51	0.0117	1.814	1.134 - 2.901	poor
LINC01272	0.225	0.752	0.474 - 1.194	none						CHEK1	0.012	1.807	1.131 - 2.887	poor
IGHV1-17	0.2454	0.762	0.482 - 1.207	none						ESPL1	0.0134	1.781	1.12 - 2.833	poor
RP11-731F5.2	0.2497	0.764	0.483 - 1.21	none						TESPA1	0.0136	0.559	0.35 - 0.893	good
LINC00426	0.258	0.766	0.483 - 1.217	none						FANCD2	0.0148	1.774	1.112 - 2.832	poor
IGHV1-12	0.2705	1.294	0.817 - 2.05	none						POU2F2	0.0153	0.565	0.354 - 0.902	good
AP000251.3	0.2853	1.285	0.81 - 2.036	none						SNX20	0.0163	0.567	0.355 - 0.906	good
AC147651.4	0.2926	0.781	0.491 - 1.24	none						CDCA8	0.0171	1.751	1.098 - 2.79	poor
IGHV1OR16-3	0.3023	0.786	0.497 - 1.243	none						B3GNT5	0.0176	1.747	1.096 - 2.784	poor
RP11-170L3.7	0.3386	0.799	0.504 - 1.266	none						MCM10	0.0177	1.741	1.095 - 2.77	poor
USP30-AS1	0.3556	0.806	0.511 - 1.274	none						GINS3	0.0188	1.735	1.089 - 2.764	poor
IGLV2-34	0.374	0.812	0.514 - 1.285	none						RACGAP1	0.019	1.735	1.089 - 2.766	poor
IGHV3-6	0.3833	0.816	0.516 - 1.289	none						POU2AF1	0.0192	0.574	0.358 - 0.919	good
NCF1C	0.4771	0.845	0.532 - 1.344	none						CD22	0.0196	0.575	0.359 - 0.921	good
IGHV1OR16-1	0.5425	0.868	0.549 - 1.37	none						MCM8	0.023	1.705	1.071 - 2.716	poor
DDX12P	0.5564	1.148	0.724 - 1.82	none						PTPRO	0.0234	0.58	0.36 - 0.934	good
IGHV7-27	0.5764	0.877	0.554 - 1.39	none						SKA1	0.0234	1.701	1.069 - 2.709	poor
IGHV3-60	0.5828	1.138	0.718 - 1.803	none						2021-03-01	0.0237	0.584	0.365 - 0.936	good
IGHV3-42	0.6419	0.897	0.568 - 1.417	none						CCNF	0.0253	1.69	1.062 - 2.689	poor
IGHV3OR16-6	0.6869	0.91	0.575 - 1.44	none						IKZF1	0.0272	0.594	0.372 - 0.948	good
HNRNPA1P21	0.72	0.919	0.578 - 1.46	none						NPL	0.0306	0.604	0.381 - 0.959	good
AP002954.4	0.7733	0.935	0.591 - 1.478	none						TK1	0.0323	1.653	1.038 - 2.631	poor
IGHV1OR15-2	0.8401	1.048	0.663 - 1.655	none						TNFSF12	0.0327	0.602	0.376 - 0.964	good
NCF1B	0.8783	0.965	0.611 - 1.524	none						PSRC1	0.0346	1.644	1.032 - 2.619	poor
PSMB8-AS1	0.9562	1.013	0.641 - 1.6	none						SMAP2	0.038	0.618	0.39 - 0.978	good
										TLR7	0.0381	0.61	0.38 - 0.978	good
										PRKCB	0.0385	0.616	0.388 - 0.979	good
										FAM136A	0.0388	1.624	1.021 - 2.586	poor
										SRPK1	0.0427	1.604	1.011 - 2.544	poor
										HDGF	0.0434	1.623	1.01 - 2.608	poor
										LSP1	0.0444	0.624	0.392 - 0.993	good
										FCRL5	0.0449	0.624	0.391 - 0.993	good
										IL7R	0.0469	0.627	0.394 - 0.998	good
										KIF18B	0.0474	1.588	1.001 - 2.518	poor
										SKP2	0.0495	1.581	0.997 - 2.507	poor
										LDLRAD4	0.0593	0.638	0.398 - 1.022	none
										PLXNC1	0.0598	0.639	0.399 - 1.023	none
										STIP1	0.0599	1.557	0.978 - 2.477	none
										CD84	0.0662	0.648	0.407 - 1.033	none
										LMNB1	0.0691	1.531	0.964 - 2.43	none
										FMNL3	0.0743	0.656	0.412 - 1.046	none
										GIMAP6	0.0831	0.666	0.419 - 1.058	none
										CDC25A	0.0837	1.5	0.944 - 2.383	none
										CD3G	0.0848	0.667	0.419 - 1.061	none
										DERL3	0.0876	0.671	0.423 - 1.064	none
										FAAP24	0.0886	1.492	0.939 - 2.37	none
										ITGAM	0.0956	0.672	0.42 - 1.076	none
										NOP2	0.098	1.469	0.929 - 2.323	none
										FAM46C	0.1015	0.676	0.422 - 1.083	none
										TUBB	0.1045	1.461	0.922 - 2.315	none
										TFEC	0.121	0.688	0.428 - 1.107	none
										IKZF3	0.1264	0.698	0.44 - 1.109	none
										NOL10	0.1409	1.411	0.89 - 2.235	none
										ARRDC4	0.1418	0.708	0.446 - 1.125	none
										ARHGEF39	0.1474	1.401	0.886 - 2.215	none
										PLEKHO2	0.1484	0.714	0.451 - 1.13	none
										EIF4A3	0.1565	1.396	0.878 - 2.218	none
										SLC9A9	0.1607	0.72	0.454 - 1.142	none
										EVL	0.1691	0.723	0.454 - 1.151	none
										NFATC2	0.1747	0.726	0.457 - 1.155	none
										STAT5A	0.1757	0.727	0.458 - 1.155	none
										SLCO2B1	0.2018	0.742	0.468 - 1.176	none
										CD86	0.2045	0.737	0.459 - 1.183	none
										SH2B3	0.2307	0.756	0.478 - 1.196	none
										EME1	0.2385	1.317	0.832 - 2.083	none
										TXNRD1	0.2445	1.315	0.828 - 2.088	none
										WIPF1	0.2657	0.77	0.486 - 1.221	none
										SLC7A1	0.2761	1.292	0.814 - 2.053	none
										DDX11	0.2846	1.283	0.812 - 2.026	none
										XPO5	0.2988	1.273	0.806 - 2.011	none
										SUV39H1	0.3056	1.273	0.801 - 2.023	none
										LAIR1	0.3069	0.786	0.495 - 1.249	none
										LCK	0.3286	0.794	0.499 - 1.262	none
										KCNAB2	0.349	0.803	0.506 - 1.273	none
										SIGLEC1	0.3642	0.808	0.509 - 1.282	none
										APOBEC3G	0.3798	1.229	0.775 - 1.951	none
										SLAMF7	0.4647	0.841	0.529 - 1.337	none
										MSR1	0.5051	0.854	0.536 - 1.36	none
										PGAM5	0.52	1.164	0.732 - 1.851	none
										NFAM1	0.5265	0.862	0.545 - 1.365	none
										CDC42SE2	0.5408	0.867	0.549 - 1.369	none
										SMPD4	0.6037	1.129	0.715 - 1.782	none
										FOXP3	0.6104	0.887	0.56 - 1.406	none
										RUNX3	0.7603	0.931	0.589 - 1.473	none
										TNFSF13B	0.7936	0.94	0.593 - 1.491	none
										PIK3AP1	0.8251	0.95	0.599 - 1.506	none

## Sheet: Survival analysis in GEO
Survival analysis results of ceRNA genes in GEO
Green means good prognosis		Red means poor prognosis
lncRNAs					mRNAs
Sample_title	P_value	HR	CI	prognosis	Sample_title	P_value	HR	CI	prognosis
LINC00324	0	0.418	0.281 - 0.62	good	DARS2	0	2.245	1.519 - 3.318	poor
LINC00426	0.0006	0.518	0.353 - 0.761	good	HMGA1	0	2.227	1.506 - 3.292	poor
LINC00892	0.0035	0.572	0.392 - 0.836	good	LDLRAD4	0	0.452	0.307 - 0.667	good
GVINP1	0.0038	0.575	0.393 - 0.841	good	PAICS	0	2.312	1.567 - 3.41	poor
ADGRE4P	0.0039	0.576	0.395 - 0.842	good	SKA3	0	2.265	1.536 - 3.34	poor
NAPSB	0.0045	0.581	0.398 - 0.849	good	SLC2A1	0	2.367	1.596 - 3.512	poor
DDX12P	0.017	1.572	1.081 - 2.287	poor	AUNIP	0.0001	2.172	1.473 - 3.203	poor
MIR155HG	0.0423	0.68	0.468 - 0.989	good	EIF4A3	0.0001	2.191	1.482 - 3.239	poor
GGTA1P	0.0459	0.685	0.472 - 0.995	good	GINS4	0.0001	2.132	1.446 - 3.145	poor
LINC00926	0.0869	0.721	0.496 - 1.05	none	HJURP	0.0001	2.102	1.429 - 3.093	poor
LINC00996	0.1269	0.749	0.517 - 1.087	none	TK1	0.0001	2.168	1.473 - 3.191	poor
PSMB8-AS1	0.1704	0.772	0.532 - 1.119	none	CDC6	0.0002	2.052	1.395 - 3.019	poor
TYMSOS	0.2346	1.252	0.864 - 1.813	none	CDCA5	0.0002	2.03	1.379 - 2.986	poor
ANKRD36BP2	0.3117	1.211	0.835 - 1.755	none	PGAM5	0.0002	2.052	1.395 - 3.018	poor
NCF1C	0.4956	0.879	0.608 - 1.272	none	PIK3IP1	0.0002	0.483	0.328 - 0.712	good
NCF1B	0.7383	0.939	0.649 - 1.358	none	CENPA	0.0003	2.003	1.362 - 2.947	poor
LINC00582	0.8677	1.032	0.713 - 1.494	none	KIF18B	0.0003	2.001	1.363 - 2.938	poor
					SKA1	0.0003	2.005	1.365 - 2.945	poor
					TXNRD1	0.0003	2.016	1.367 - 2.971	poor
					CDCA8	0.0004	1.966	1.339 - 2.886	poor
					TESPA1	0.0004	0.503	0.343 - 0.739	good
					GAB3	0.0006	0.518	0.354 - 0.76	good
					PRR11	0.0006	1.932	1.318 - 2.834	poor
					CCNA2	0.0007	1.916	1.308 - 2.808	poor
					CHEK1	0.0007	1.927	1.312 - 2.829	poor
					MIS18A	0.0007	1.921	1.308 - 2.82	poor
					CDC42SE2	0.0008	0.523	0.357 - 0.768	good
					SRPK1	0.0008	1.916	1.304 - 2.815	poor
					CENPF	0.0012	1.856	1.269 - 2.715	poor
					HDGF	0.0012	1.871	1.274 - 2.747	poor
					NCAPG	0.0012	1.859	1.269 - 2.724	poor
					SPC24	0.0012	1.854	1.267 - 2.712	poor
					SPN	0.0012	0.539	0.368 - 0.788	good
					KPNB1	0.0015	1.854	1.26 - 2.728	poor
					NOL10	0.0025	1.785	1.22 - 2.611	poor
					NOP2	0.0025	1.775	1.217 - 2.59	poor
					NDC1	0.0035	1.744	1.196 - 2.545	poor
					EME1	0.0038	1.734	1.189 - 2.528	poor
					GIMAP6	0.0039	0.577	0.396 - 0.842	good
					XPO5	0.004	1.736	1.187 - 2.538	poor
					RAD51	0.0044	1.721	1.179 - 2.513	poor
					TUBB	0.0048	1.706	1.171 - 2.485	poor
					TNFSF12	0.0053	0.588	0.403 - 0.858	good
					GNG7	0.0057	0.588	0.402 - 0.861	good
					SAPCD2	0.0074	1.665	1.142 - 2.428	poor
					IKZF1	0.0081	0.605	0.415 - 0.881	good
					MYBL2	0.0081	1.656	1.136 - 2.415	poor
					STIP1	0.0084	1.65	1.133 - 2.405	poor
					SLCO2B1	0.0089	0.609	0.419 - 0.886	good
					POLQ	0.009	1.642	1.128 - 2.391	poor
					MCM10	0.0093	1.641	1.126 - 2.392	poor
					STIL	0.01	1.629	1.12 - 2.369	poor
					ARHGEF39	0.0104	1.627	1.117 - 2.369	poor
					ESPL1	0.0104	1.627	1.117 - 2.369	poor
					NUSAP1	0.0124	1.606	1.104 - 2.337	poor
					CD3G	0.0148	0.629	0.432 - 0.916	good
					IL7R	0.0161	0.634	0.436 - 0.922	good
					FAM46C	0.0164	0.632	0.433 - 0.922	good
					CCNF	0.0167	1.574	1.082 - 2.288	poor
					SH3BGRL	0.0168	0.635	0.437 - 0.924	good
					DDX11	0.017	1.572	1.081 - 2.287	poor
					RACGAP1	0.0172	1.573	1.08 - 2.291	poor
					WDR76	0.0184	1.567	1.075 - 2.285	poor
					CDC25A	0.0234	1.537	1.057 - 2.235	poor
					BRCA1	0.0258	1.528	1.05 - 2.225	poor
					TCF19	0.0282	1.516	1.043 - 2.205	poor
					SUV39H1	0.0304	1.508	1.037 - 2.192	poor
					RUNX3	0.0383	0.676	0.465 - 0.981	good
					SNX20	0.0384	0.676	0.465 - 0.981	good
					IL16	0.0388	0.676	0.465 - 0.982	good
					TIMELESS	0.0388	1.479	1.018 - 2.15	poor
					TLR7	0.0411	0.679	0.467 - 0.987	good
					APOBEC3G	0.0448	0.683	0.47 - 0.993	good
					PSRC1	0.0465	1.458	1.004 - 2.118	poor
					SLC9A9	0.0472	0.687	0.473 - 0.997	good
					SLC7A1	0.0475	1.457	1.002 - 2.12	poor
					PRKCB	0.0567	0.698	0.481 - 1.012	none
					FAM136A	0.0577	1.433	0.986 - 2.082	none
					LMNB2	0.0583	1.433	0.985 - 2.084	none
					CD22	0.0636	0.703	0.484 - 1.022	none
					SMAP2	0.0678	0.707	0.487 - 1.028	none
					FANCD2	0.0723	1.405	0.968 - 2.039	none
					FAAP24	0.0748	1.4	0.965 - 2.032	none
					TFEC	0.0784	0.716	0.493 - 1.04	none
					LAIR1	0.0795	0.718	0.495 - 1.041	none
					E2F7	0.0802	1.393	0.959 - 2.021	none
					IKZF3	0.0952	0.729	0.502 - 1.058	none
					SH2B3	0.0969	0.731	0.504 - 1.06	none
					MCM8	0.1037	1.362	0.937 - 1.978	none
					XRCC2	0.1043	1.362	0.937 - 1.979	none
					EVL	0.1046	0.736	0.508 - 1.067	none
					KCNAB2	0.1542	0.765	0.528 - 1.107	none
					GINS3	0.1626	1.302	0.898 - 1.888	none
					SIGLEC1	0.164	0.769	0.531 - 1.114	none
					CENPK	0.1669	1.298	0.896 - 1.879	none
					LSP1	0.1707	0.772	0.533 - 1.119	none
					FBXO45	0.1729	1.293	0.892 - 1.874	none
					CD28	0.1791	0.776	0.535 - 1.125	none
					DENR	0.1835	1.286	0.887 - 1.864	none
					FMNL3	0.2073	0.788	0.544 - 1.142	none
					PTPRO	0.222	0.794	0.549 - 1.15	none
					H2AFX	0.2382	1.25	0.862 - 1.815	none
					IRF4	0.2391	0.801	0.552 - 1.16	none
					MSR1	0.2584	0.808	0.557 - 1.171	none
					STAT5A	0.2679	0.811	0.56 - 1.175	none
					INCENP	0.2999	1.216	0.84 - 1.759	none
					BORA	0.302	1.215	0.839 - 1.761	none
					ITGAM	0.3032	0.823	0.569 - 1.193	none
					PLEKHO2	0.3114	0.826	0.57 - 1.196	none
					LCK	0.4064	0.855	0.591 - 1.238	none
					NFATC2	0.41	0.856	0.591 - 1.24	none
					ARRDC4	0.4227	0.86	0.594 - 1.244	none
					FCRL5	0.4846	1.141	0.788 - 1.652	none
					FOXP3	0.4916	0.878	0.607 - 1.272	none
					POU2AF1	0.493	1.138	0.786 - 1.647	none
					CD84	0.4954	0.88	0.608 - 1.272	none
					PSMD11	0.4964	1.137	0.785 - 1.646	none
					2021-03-01	0.5016	0.881	0.608 - 1.275	none
					PAX5	0.5081	0.883	0.61 - 1.278	none
					SKP2	0.5164	1.13	0.781 - 1.636	none
					YWHAG	0.5309	1.125	0.778 - 1.628	none
					PIK3AP1	0.5814	0.901	0.623 - 1.304	none
					CD86	0.5966	0.905	0.626 - 1.309	none
					PLXNC1	0.618	0.91	0.629 - 1.317	none
					WIPF1	0.6522	0.919	0.635 - 1.329	none
					SLAMF7	0.6729	0.923	0.638 - 1.336	none
					TMPO	0.6775	1.082	0.747 - 1.566	none
					NPL	0.7421	1.064	0.735 - 1.539	none
					IGF2BP3	0.7612	1.059	0.732 - 1.532	none
					NFAM1	0.7699	0.946	0.654 - 1.369	none
					FCRL2	0.7707	1.057	0.73 - 1.529	none
					DERL3	0.7931	1.051	0.726 - 1.522	none
					LMNB1	0.8648	1.033	0.714 - 1.494	none
					B3GNT5	0.9283	1.017	0.703 - 1.471	none
					POU2F2	0.9498	1.012	0.7 - 1.464	none
					SMPD4	0.953	1.011	0.699 - 1.464	none
					TNFSF13B	0.9925	1.002	0.692 - 1.449	none

## Sheet: ceRNA for Turquoise module
Regulatory relationship in ceRNA network for Turquoise module
lncRNA	lncRNA_style	lncRNA_Biotype	miRNA	miRNA_style	miRNA_Biotype	Gene Symbol	mRNA_style	mRNA_Biotype
GGTA1P	down	lncRNA	hsa-miR-9-5p	up	miRNA	CD84	down	mRNA
GVINP1	down	lncRNA	hsa-miR-9-5p	up	miRNA	CD84	down	mRNA
HLA-DQB1-AS1	down	lncRNA	hsa-miR-9-5p	up	miRNA	CD84	down	mRNA
HNRNPA1P21	down	lncRNA	hsa-miR-9-5p	up	miRNA	CD84	down	mRNA
LINC00324	down	lncRNA	hsa-miR-9-5p	up	miRNA	CD84	down	mRNA
LINC00426	down	lncRNA	hsa-miR-9-5p	up	miRNA	CD84	down	mRNA
LINC00892	down	lncRNA	hsa-miR-9-5p	up	miRNA	CD84	down	mRNA
LINC00926	down	lncRNA	hsa-miR-9-5p	up	miRNA	CD84	down	mRNA
LINC01480	down	lncRNA	hsa-miR-9-5p	up	miRNA	CD84	down	mRNA
MIR155HG	down	lncRNA	hsa-miR-9-5p	up	miRNA	CD84	down	mRNA
NCF1B	down	lncRNA	hsa-miR-9-5p	up	miRNA	CD84	down	mRNA
NCF1C	down	lncRNA	hsa-miR-9-5p	up	miRNA	CD84	down	mRNA
NPM1P25	down	lncRNA	hsa-miR-9-5p	up	miRNA	CD84	down	mRNA
PCED1B-AS1	down	lncRNA	hsa-miR-9-5p	up	miRNA	CD84	down	mRNA
PSMB8-AS1	down	lncRNA	hsa-miR-9-5p	up	miRNA	CD84	down	mRNA
RP11-473M20.9	down	lncRNA	hsa-miR-9-5p	up	miRNA	CD84	down	mRNA
RP11-876N24.4	down	lncRNA	hsa-miR-9-5p	up	miRNA	CD84	down	mRNA
GGTA1P	down	lncRNA	hsa-miR-9-5p	up	miRNA	FCRL2	down	mRNA
GVINP1	down	lncRNA	hsa-miR-9-5p	up	miRNA	FCRL2	down	mRNA
HLA-DQB1-AS1	down	lncRNA	hsa-miR-9-5p	up	miRNA	FCRL2	down	mRNA
HNRNPA1P21	down	lncRNA	hsa-miR-9-5p	up	miRNA	FCRL2	down	mRNA
LINC00324	down	lncRNA	hsa-miR-9-5p	up	miRNA	FCRL2	down	mRNA
LINC00426	down	lncRNA	hsa-miR-9-5p	up	miRNA	FCRL2	down	mRNA
LINC00892	down	lncRNA	hsa-miR-9-5p	up	miRNA	FCRL2	down	mRNA
LINC00926	down	lncRNA	hsa-miR-9-5p	up	miRNA	FCRL2	down	mRNA
LINC01480	down	lncRNA	hsa-miR-9-5p	up	miRNA	FCRL2	down	mRNA
MIR155HG	down	lncRNA	hsa-miR-9-5p	up	miRNA	FCRL2	down	mRNA
NCF1B	down	lncRNA	hsa-miR-9-5p	up	miRNA	FCRL2	down	mRNA
NCF1C	down	lncRNA	hsa-miR-9-5p	up	miRNA	FCRL2	down	mRNA
NPM1P25	down	lncRNA	hsa-miR-9-5p	up	miRNA	FCRL2	down	mRNA
PCED1B-AS1	down	lncRNA	hsa-miR-9-5p	up	miRNA	FCRL2	down	mRNA
PSMB8-AS1	down	lncRNA	hsa-miR-9-5p	up	miRNA	FCRL2	down	mRNA
RP11-473M20.9	down	lncRNA	hsa-miR-9-5p	up	miRNA	FCRL2	down	mRNA
RP11-876N24.4	down	lncRNA	hsa-miR-9-5p	up	miRNA	FCRL2	down	mRNA
GGTA1P	down	lncRNA	hsa-miR-9-5p	up	miRNA	GAB3	down	mRNA
GVINP1	down	lncRNA	hsa-miR-9-5p	up	miRNA	GAB3	down	mRNA
HLA-DQB1-AS1	down	lncRNA	hsa-miR-9-5p	up	miRNA	GAB3	down	mRNA
HNRNPA1P21	down	lncRNA	hsa-miR-9-5p	up	miRNA	GAB3	down	mRNA
LINC00324	down	lncRNA	hsa-miR-9-5p	up	miRNA	GAB3	down	mRNA
LINC00426	down	lncRNA	hsa-miR-9-5p	up	miRNA	GAB3	down	mRNA
LINC00892	down	lncRNA	hsa-miR-9-5p	up	miRNA	GAB3	down	mRNA
LINC00926	down	lncRNA	hsa-miR-9-5p	up	miRNA	GAB3	down	mRNA
LINC01480	down	lncRNA	hsa-miR-9-5p	up	miRNA	GAB3	down	mRNA
MIR155HG	down	lncRNA	hsa-miR-9-5p	up	miRNA	GAB3	down	mRNA
NCF1B	down	lncRNA	hsa-miR-9-5p	up	miRNA	GAB3	down	mRNA
NCF1C	down	lncRNA	hsa-miR-9-5p	up	miRNA	GAB3	down	mRNA
NPM1P25	down	lncRNA	hsa-miR-9-5p	up	miRNA	GAB3	down	mRNA
PCED1B-AS1	down	lncRNA	hsa-miR-9-5p	up	miRNA	GAB3	down	mRNA
PSMB8-AS1	down	lncRNA	hsa-miR-9-5p	up	miRNA	GAB3	down	mRNA
RP11-473M20.9	down	lncRNA	hsa-miR-9-5p	up	miRNA	GAB3	down	mRNA
RP11-876N24.4	down	lncRNA	hsa-miR-9-5p	up	miRNA	GAB3	down	mRNA
GGTA1P	down	lncRNA	hsa-miR-9-5p	up	miRNA	GIMAP6	down	mRNA
GVINP1	down	lncRNA	hsa-miR-9-5p	up	miRNA	GIMAP6	down	mRNA
HLA-DQB1-AS1	down	lncRNA	hsa-miR-9-5p	up	miRNA	GIMAP6	down	mRNA
HNRNPA1P21	down	lncRNA	hsa-miR-9-5p	up	miRNA	GIMAP6	down	mRNA
LINC00324	down	lncRNA	hsa-miR-9-5p	up	miRNA	GIMAP6	down	mRNA
LINC00426	down	lncRNA	hsa-miR-9-5p	up	miRNA	GIMAP6	down	mRNA
LINC00892	down	lncRNA	hsa-miR-9-5p	up	miRNA	GIMAP6	down	mRNA
LINC00926	down	lncRNA	hsa-miR-9-5p	up	miRNA	GIMAP6	down	mRNA
LINC01480	down	lncRNA	hsa-miR-9-5p	up	miRNA	GIMAP6	down	mRNA
MIR155HG	down	lncRNA	hsa-miR-9-5p	up	miRNA	GIMAP6	down	mRNA
NCF1B	down	lncRNA	hsa-miR-9-5p	up	miRNA	GIMAP6	down	mRNA
NCF1C	down	lncRNA	hsa-miR-9-5p	up	miRNA	GIMAP6	down	mRNA
NPM1P25	down	lncRNA	hsa-miR-9-5p	up	miRNA	GIMAP6	down	mRNA
PCED1B-AS1	down	lncRNA	hsa-miR-9-5p	up	miRNA	GIMAP6	down	mRNA
PSMB8-AS1	down	lncRNA	hsa-miR-9-5p	up	miRNA	GIMAP6	down	mRNA
RP11-473M20.9	down	lncRNA	hsa-miR-9-5p	up	miRNA	GIMAP6	down	mRNA
RP11-876N24.4	down	lncRNA	hsa-miR-9-5p	up	miRNA	GIMAP6	down	mRNA
GGTA1P	down	lncRNA	hsa-miR-9-5p	up	miRNA	MARCH1	down	mRNA
GVINP1	down	lncRNA	hsa-miR-9-5p	up	miRNA	MARCH1	down	mRNA
HLA-DQB1-AS1	down	lncRNA	hsa-miR-9-5p	up	miRNA	MARCH1	down	mRNA
HNRNPA1P21	down	lncRNA	hsa-miR-9-5p	up	miRNA	MARCH1	down	mRNA
LINC00324	down	lncRNA	hsa-miR-9-5p	up	miRNA	MARCH1	down	mRNA
LINC00426	down	lncRNA	hsa-miR-9-5p	up	miRNA	MARCH1	down	mRNA
LINC00892	down	lncRNA	hsa-miR-9-5p	up	miRNA	MARCH1	down	mRNA
LINC00926	down	lncRNA	hsa-miR-9-5p	up	miRNA	MARCH1	down	mRNA
LINC01480	down	lncRNA	hsa-miR-9-5p	up	miRNA	MARCH1	down	mRNA
MIR155HG	down	lncRNA	hsa-miR-9-5p	up	miRNA	MARCH1	down	mRNA
NCF1B	down	lncRNA	hsa-miR-9-5p	up	miRNA	MARCH1	down	mRNA
NCF1C	down	lncRNA	hsa-miR-9-5p	up	miRNA	MARCH1	down	mRNA
NPM1P25	down	lncRNA	hsa-miR-9-5p	up	miRNA	MARCH1	down	mRNA
PCED1B-AS1	down	lncRNA	hsa-miR-9-5p	up	miRNA	MARCH1	down	mRNA
PSMB8-AS1	down	lncRNA	hsa-miR-9-5p	up	miRNA	MARCH1	down	mRNA
RP11-473M20.9	down	lncRNA	hsa-miR-9-5p	up	miRNA	MARCH1	down	mRNA
RP11-876N24.4	down	lncRNA	hsa-miR-9-5p	up	miRNA	MARCH1	down	mRNA
GGTA1P	down	lncRNA	hsa-miR-9-5p	up	miRNA	NFATC2	down	mRNA
GVINP1	down	lncRNA	hsa-miR-9-5p	up	miRNA	NFATC2	down	mRNA
HLA-DQB1-AS1	down	lncRNA	hsa-miR-9-5p	up	miRNA	NFATC2	down	mRNA
HNRNPA1P21	down	lncRNA	hsa-miR-9-5p	up	miRNA	NFATC2	down	mRNA
LINC00324	down	lncRNA	hsa-miR-9-5p	up	miRNA	NFATC2	down	mRNA
LINC00426	down	lncRNA	hsa-miR-9-5p	up	miRNA	NFATC2	down	mRNA
LINC00892	down	lncRNA	hsa-miR-9-5p	up	miRNA	NFATC2	down	mRNA
LINC00926	down	lncRNA	hsa-miR-9-5p	up	miRNA	NFATC2	down	mRNA
LINC01480	down	lncRNA	hsa-miR-9-5p	up	miRNA	NFATC2	down	mRNA
MIR155HG	down	lncRNA	hsa-miR-9-5p	up	miRNA	NFATC2	down	mRNA
NCF1B	down	lncRNA	hsa-miR-9-5p	up	miRNA	NFATC2	down	mRNA
NCF1C	down	lncRNA	hsa-miR-9-5p	up	miRNA	NFATC2	down	mRNA
NPM1P25	down	lncRNA	hsa-miR-9-5p	up	miRNA	NFATC2	down	mRNA
PCED1B-AS1	down	lncRNA	hsa-miR-9-5p	up	miRNA	NFATC2	down	mRNA
PSMB8-AS1	down	lncRNA	hsa-miR-9-5p	up	miRNA	NFATC2	down	mRNA
RP11-473M20.9	down	lncRNA	hsa-miR-9-5p	up	miRNA	NFATC2	down	mRNA
RP11-876N24.4	down	lncRNA	hsa-miR-9-5p	up	miRNA	NFATC2	down	mRNA
GGTA1P	down	lncRNA	hsa-miR-9-5p	up	miRNA	PIK3AP1	down	mRNA
GVINP1	down	lncRNA	hsa-miR-9-5p	up	miRNA	PIK3AP1	down	mRNA
HLA-DQB1-AS1	down	lncRNA	hsa-miR-9-5p	up	miRNA	PIK3AP1	down	mRNA
HNRNPA1P21	down	lncRNA	hsa-miR-9-5p	up	miRNA	PIK3AP1	down	mRNA
LINC00324	down	lncRNA	hsa-miR-9-5p	up	miRNA	PIK3AP1	down	mRNA
LINC00426	down	lncRNA	hsa-miR-9-5p	up	miRNA	PIK3AP1	down	mRNA
LINC00892	down	lncRNA	hsa-miR-9-5p	up	miRNA	PIK3AP1	down	mRNA
LINC00926	down	lncRNA	hsa-miR-9-5p	up	miRNA	PIK3AP1	down	mRNA
LINC01480	down	lncRNA	hsa-miR-9-5p	up	miRNA	PIK3AP1	down	mRNA
MIR155HG	down	lncRNA	hsa-miR-9-5p	up	miRNA	PIK3AP1	down	mRNA
NCF1B	down	lncRNA	hsa-miR-9-5p	up	miRNA	PIK3AP1	down	mRNA
NCF1C	down	lncRNA	hsa-miR-9-5p	up	miRNA	PIK3AP1	down	mRNA
NPM1P25	down	lncRNA	hsa-miR-9-5p	up	miRNA	PIK3AP1	down	mRNA
PCED1B-AS1	down	lncRNA	hsa-miR-9-5p	up	miRNA	PIK3AP1	down	mRNA
PSMB8-AS1	down	lncRNA	hsa-miR-9-5p	up	miRNA	PIK3AP1	down	mRNA
RP11-473M20.9	down	lncRNA	hsa-miR-9-5p	up	miRNA	PIK3AP1	down	mRNA
RP11-876N24.4	down	lncRNA	hsa-miR-9-5p	up	miRNA	PIK3AP1	down	mRNA
GGTA1P	down	lncRNA	hsa-miR-9-5p	up	miRNA	POU2F2	down	mRNA
GVINP1	down	lncRNA	hsa-miR-9-5p	up	miRNA	POU2F2	down	mRNA
HLA-DQB1-AS1	down	lncRNA	hsa-miR-9-5p	up	miRNA	POU2F2	down	mRNA
HNRNPA1P21	down	lncRNA	hsa-miR-9-5p	up	miRNA	POU2F2	down	mRNA
LINC00324	down	lncRNA	hsa-miR-9-5p	up	miRNA	POU2F2	down	mRNA
LINC00426	down	lncRNA	hsa-miR-9-5p	up	miRNA	POU2F2	down	mRNA
LINC00892	down	lncRNA	hsa-miR-9-5p	up	miRNA	POU2F2	down	mRNA
LINC00926	down	lncRNA	hsa-miR-9-5p	up	miRNA	POU2F2	down	mRNA
LINC01480	down	lncRNA	hsa-miR-9-5p	up	miRNA	POU2F2	down	mRNA
MIR155HG	down	lncRNA	hsa-miR-9-5p	up	miRNA	POU2F2	down	mRNA
NCF1B	down	lncRNA	hsa-miR-9-5p	up	miRNA	POU2F2	down	mRNA
NCF1C	down	lncRNA	hsa-miR-9-5p	up	miRNA	POU2F2	down	mRNA
NPM1P25	down	lncRNA	hsa-miR-9-5p	up	miRNA	POU2F2	down	mRNA
PCED1B-AS1	down	lncRNA	hsa-miR-9-5p	up	miRNA	POU2F2	down	mRNA
PSMB8-AS1	down	lncRNA	hsa-miR-9-5p	up	miRNA	POU2F2	down	mRNA
RP11-473M20.9	down	lncRNA	hsa-miR-9-5p	up	miRNA	POU2F2	down	mRNA
RP11-876N24.4	down	lncRNA	hsa-miR-9-5p	up	miRNA	POU2F2	down	mRNA
GGTA1P	down	lncRNA	hsa-miR-9-5p	up	miRNA	PRKCB	down	mRNA
GVINP1	down	lncRNA	hsa-miR-9-5p	up	miRNA	PRKCB	down	mRNA
HLA-DQB1-AS1	down	lncRNA	hsa-miR-9-5p	up	miRNA	PRKCB	down	mRNA
HNRNPA1P21	down	lncRNA	hsa-miR-9-5p	up	miRNA	PRKCB	down	mRNA
LINC00324	down	lncRNA	hsa-miR-9-5p	up	miRNA	PRKCB	down	mRNA
LINC00426	down	lncRNA	hsa-miR-9-5p	up	miRNA	PRKCB	down	mRNA
LINC00892	down	lncRNA	hsa-miR-9-5p	up	miRNA	PRKCB	down	mRNA
LINC00926	down	lncRNA	hsa-miR-9-5p	up	miRNA	PRKCB	down	mRNA
LINC01480	down	lncRNA	hsa-miR-9-5p	up	miRNA	PRKCB	down	mRNA
MIR155HG	down	lncRNA	hsa-miR-9-5p	up	miRNA	PRKCB	down	mRNA
NCF1B	down	lncRNA	hsa-miR-9-5p	up	miRNA	PRKCB	down	mRNA
NCF1C	down	lncRNA	hsa-miR-9-5p	up	miRNA	PRKCB	down	mRNA
NPM1P25	down	lncRNA	hsa-miR-9-5p	up	miRNA	PRKCB	down	mRNA
PCED1B-AS1	down	lncRNA	hsa-miR-9-5p	up	miRNA	PRKCB	down	mRNA
PSMB8-AS1	down	lncRNA	hsa-miR-9-5p	up	miRNA	PRKCB	down	mRNA
RP11-473M20.9	down	lncRNA	hsa-miR-9-5p	up	miRNA	PRKCB	down	mRNA
RP11-876N24.4	down	lncRNA	hsa-miR-9-5p	up	miRNA	PRKCB	down	mRNA
GGTA1P	down	lncRNA	hsa-miR-9-5p	up	miRNA	SMAP2	down	mRNA
GVINP1	down	lncRNA	hsa-miR-9-5p	up	miRNA	SMAP2	down	mRNA
HLA-DQB1-AS1	down	lncRNA	hsa-miR-9-5p	up	miRNA	SMAP2	down	mRNA
HNRNPA1P21	down	lncRNA	hsa-miR-9-5p	up	miRNA	SMAP2	down	mRNA
LINC00324	down	lncRNA	hsa-miR-9-5p	up	miRNA	SMAP2	down	mRNA
LINC00426	down	lncRNA	hsa-miR-9-5p	up	miRNA	SMAP2	down	mRNA
LINC00892	down	lncRNA	hsa-miR-9-5p	up	miRNA	SMAP2	down	mRNA
LINC00926	down	lncRNA	hsa-miR-9-5p	up	miRNA	SMAP2	down	mRNA
LINC01480	down	lncRNA	hsa-miR-9-5p	up	miRNA	SMAP2	down	mRNA
MIR155HG	down	lncRNA	hsa-miR-9-5p	up	miRNA	SMAP2	down	mRNA
NCF1B	down	lncRNA	hsa-miR-9-5p	up	miRNA	SMAP2	down	mRNA
NCF1C	down	lncRNA	hsa-miR-9-5p	up	miRNA	SMAP2	down	mRNA
NPM1P25	down	lncRNA	hsa-miR-9-5p	up	miRNA	SMAP2	down	mRNA
PCED1B-AS1	down	lncRNA	hsa-miR-9-5p	up	miRNA	SMAP2	down	mRNA
PSMB8-AS1	down	lncRNA	hsa-miR-9-5p	up	miRNA	SMAP2	down	mRNA
RP11-473M20.9	down	lncRNA	hsa-miR-9-5p	up	miRNA	SMAP2	down	mRNA
RP11-876N24.4	down	lncRNA	hsa-miR-9-5p	up	miRNA	SMAP2	down	mRNA
GGTA1P	down	lncRNA	hsa-miR-9-5p	up	miRNA	SNX20	down	mRNA
GVINP1	down	lncRNA	hsa-miR-9-5p	up	miRNA	SNX20	down	mRNA
HLA-DQB1-AS1	down	lncRNA	hsa-miR-9-5p	up	miRNA	SNX20	down	mRNA
HNRNPA1P21	down	lncRNA	hsa-miR-9-5p	up	miRNA	SNX20	down	mRNA
LINC00324	down	lncRNA	hsa-miR-9-5p	up	miRNA	SNX20	down	mRNA
LINC00426	down	lncRNA	hsa-miR-9-5p	up	miRNA	SNX20	down	mRNA
LINC00892	down	lncRNA	hsa-miR-9-5p	up	miRNA	SNX20	down	mRNA
LINC00926	down	lncRNA	hsa-miR-9-5p	up	miRNA	SNX20	down	mRNA
LINC01480	down	lncRNA	hsa-miR-9-5p	up	miRNA	SNX20	down	mRNA
MIR155HG	down	lncRNA	hsa-miR-9-5p	up	miRNA	SNX20	down	mRNA
NCF1B	down	lncRNA	hsa-miR-9-5p	up	miRNA	SNX20	down	mRNA
NCF1C	down	lncRNA	hsa-miR-9-5p	up	miRNA	SNX20	down	mRNA
NPM1P25	down	lncRNA	hsa-miR-9-5p	up	miRNA	SNX20	down	mRNA
PCED1B-AS1	down	lncRNA	hsa-miR-9-5p	up	miRNA	SNX20	down	mRNA
PSMB8-AS1	down	lncRNA	hsa-miR-9-5p	up	miRNA	SNX20	down	mRNA
RP11-473M20.9	down	lncRNA	hsa-miR-9-5p	up	miRNA	SNX20	down	mRNA
RP11-876N24.4	down	lncRNA	hsa-miR-9-5p	up	miRNA	SNX20	down	mRNA
GGTA1P	down	lncRNA	hsa-miR-9-5p	up	miRNA	TNFSF13B	down	mRNA
GVINP1	down	lncRNA	hsa-miR-9-5p	up	miRNA	TNFSF13B	down	mRNA
HLA-DQB1-AS1	down	lncRNA	hsa-miR-9-5p	up	miRNA	TNFSF13B	down	mRNA
HNRNPA1P21	down	lncRNA	hsa-miR-9-5p	up	miRNA	TNFSF13B	down	mRNA
LINC00324	down	lncRNA	hsa-miR-9-5p	up	miRNA	TNFSF13B	down	mRNA
LINC00426	down	lncRNA	hsa-miR-9-5p	up	miRNA	TNFSF13B	down	mRNA
LINC00892	down	lncRNA	hsa-miR-9-5p	up	miRNA	TNFSF13B	down	mRNA
LINC00926	down	lncRNA	hsa-miR-9-5p	up	miRNA	TNFSF13B	down	mRNA
LINC01480	down	lncRNA	hsa-miR-9-5p	up	miRNA	TNFSF13B	down	mRNA
MIR155HG	down	lncRNA	hsa-miR-9-5p	up	miRNA	TNFSF13B	down	mRNA
NCF1B	down	lncRNA	hsa-miR-9-5p	up	miRNA	TNFSF13B	down	mRNA
NCF1C	down	lncRNA	hsa-miR-9-5p	up	miRNA	TNFSF13B	down	mRNA
NPM1P25	down	lncRNA	hsa-miR-9-5p	up	miRNA	TNFSF13B	down	mRNA
PCED1B-AS1	down	lncRNA	hsa-miR-9-5p	up	miRNA	TNFSF13B	down	mRNA
PSMB8-AS1	down	lncRNA	hsa-miR-9-5p	up	miRNA	TNFSF13B	down	mRNA
RP11-473M20.9	down	lncRNA	hsa-miR-9-5p	up	miRNA	TNFSF13B	down	mRNA
RP11-876N24.4	down	lncRNA	hsa-miR-9-5p	up	miRNA	TNFSF13B	down	mRNA
GGTA1P	down	lncRNA	hsa-miR-503-5p	up	miRNA	CD84	down	mRNA
GVINP1	down	lncRNA	hsa-miR-503-5p	up	miRNA	CD84	down	mRNA
LINC00324	down	lncRNA	hsa-miR-503-5p	up	miRNA	CD84	down	mRNA
LINC00426	down	lncRNA	hsa-miR-503-5p	up	miRNA	CD84	down	mRNA
LINC00926	down	lncRNA	hsa-miR-503-5p	up	miRNA	CD84	down	mRNA
NAPSB	down	lncRNA	hsa-miR-503-5p	up	miRNA	CD84	down	mRNA
NPM1P25	down	lncRNA	hsa-miR-503-5p	up	miRNA	CD84	down	mRNA
PSMB8-AS1	down	lncRNA	hsa-miR-503-5p	up	miRNA	CD84	down	mRNA
RP11-1094M14.8	down	lncRNA	hsa-miR-503-5p	up	miRNA	CD84	down	mRNA
RP11-876N24.4	down	lncRNA	hsa-miR-503-5p	up	miRNA	CD84	down	mRNA
RP5-1171I10.5	down	lncRNA	hsa-miR-503-5p	up	miRNA	CD84	down	mRNA
TRG-AS1	down	lncRNA	hsa-miR-503-5p	up	miRNA	CD84	down	mRNA
GGTA1P	down	lncRNA	hsa-miR-503-5p	up	miRNA	CDC42SE2	down	mRNA
GVINP1	down	lncRNA	hsa-miR-503-5p	up	miRNA	CDC42SE2	down	mRNA
LINC00324	down	lncRNA	hsa-miR-503-5p	up	miRNA	CDC42SE2	down	mRNA
LINC00426	down	lncRNA	hsa-miR-503-5p	up	miRNA	CDC42SE2	down	mRNA
LINC00926	down	lncRNA	hsa-miR-503-5p	up	miRNA	CDC42SE2	down	mRNA
NAPSB	down	lncRNA	hsa-miR-503-5p	up	miRNA	CDC42SE2	down	mRNA
NPM1P25	down	lncRNA	hsa-miR-503-5p	up	miRNA	CDC42SE2	down	mRNA
PSMB8-AS1	down	lncRNA	hsa-miR-503-5p	up	miRNA	CDC42SE2	down	mRNA
RP11-1094M14.8	down	lncRNA	hsa-miR-503-5p	up	miRNA	CDC42SE2	down	mRNA
RP11-876N24.4	down	lncRNA	hsa-miR-503-5p	up	miRNA	CDC42SE2	down	mRNA
RP5-1171I10.5	down	lncRNA	hsa-miR-503-5p	up	miRNA	CDC42SE2	down	mRNA
TRG-AS1	down	lncRNA	hsa-miR-503-5p	up	miRNA	CDC42SE2	down	mRNA
GGTA1P	down	lncRNA	hsa-miR-503-5p	up	miRNA	GNG7	down	mRNA
GVINP1	down	lncRNA	hsa-miR-503-5p	up	miRNA	GNG7	down	mRNA
LINC00324	down	lncRNA	hsa-miR-503-5p	up	miRNA	GNG7	down	mRNA
LINC00426	down	lncRNA	hsa-miR-503-5p	up	miRNA	GNG7	down	mRNA
LINC00926	down	lncRNA	hsa-miR-503-5p	up	miRNA	GNG7	down	mRNA
NAPSB	down	lncRNA	hsa-miR-503-5p	up	miRNA	GNG7	down	mRNA
NPM1P25	down	lncRNA	hsa-miR-503-5p	up	miRNA	GNG7	down	mRNA
PSMB8-AS1	down	lncRNA	hsa-miR-503-5p	up	miRNA	GNG7	down	mRNA
RP11-1094M14.8	down	lncRNA	hsa-miR-503-5p	up	miRNA	GNG7	down	mRNA
RP11-876N24.4	down	lncRNA	hsa-miR-503-5p	up	miRNA	GNG7	down	mRNA
RP5-1171I10.5	down	lncRNA	hsa-miR-503-5p	up	miRNA	GNG7	down	mRNA
TRG-AS1	down	lncRNA	hsa-miR-503-5p	up	miRNA	GNG7	down	mRNA
GGTA1P	down	lncRNA	hsa-miR-503-5p	up	miRNA	IKZF3	down	mRNA
GVINP1	down	lncRNA	hsa-miR-503-5p	up	miRNA	IKZF3	down	mRNA
LINC00324	down	lncRNA	hsa-miR-503-5p	up	miRNA	IKZF3	down	mRNA
LINC00426	down	lncRNA	hsa-miR-503-5p	up	miRNA	IKZF3	down	mRNA
LINC00926	down	lncRNA	hsa-miR-503-5p	up	miRNA	IKZF3	down	mRNA
NAPSB	down	lncRNA	hsa-miR-503-5p	up	miRNA	IKZF3	down	mRNA
NPM1P25	down	lncRNA	hsa-miR-503-5p	up	miRNA	IKZF3	down	mRNA
PSMB8-AS1	down	lncRNA	hsa-miR-503-5p	up	miRNA	IKZF3	down	mRNA
RP11-1094M14.8	down	lncRNA	hsa-miR-503-5p	up	miRNA	IKZF3	down	mRNA
RP11-876N24.4	down	lncRNA	hsa-miR-503-5p	up	miRNA	IKZF3	down	mRNA
RP5-1171I10.5	down	lncRNA	hsa-miR-503-5p	up	miRNA	IKZF3	down	mRNA
TRG-AS1	down	lncRNA	hsa-miR-503-5p	up	miRNA	IKZF3	down	mRNA
GGTA1P	down	lncRNA	hsa-miR-503-5p	up	miRNA	IL7R	down	mRNA
GVINP1	down	lncRNA	hsa-miR-503-5p	up	miRNA	IL7R	down	mRNA
LINC00324	down	lncRNA	hsa-miR-503-5p	up	miRNA	IL7R	down	mRNA
LINC00426	down	lncRNA	hsa-miR-503-5p	up	miRNA	IL7R	down	mRNA
LINC00926	down	lncRNA	hsa-miR-503-5p	up	miRNA	IL7R	down	mRNA
NAPSB	down	lncRNA	hsa-miR-503-5p	up	miRNA	IL7R	down	mRNA
NPM1P25	down	lncRNA	hsa-miR-503-5p	up	miRNA	IL7R	down	mRNA
PSMB8-AS1	down	lncRNA	hsa-miR-503-5p	up	miRNA	IL7R	down	mRNA
RP11-1094M14.8	down	lncRNA	hsa-miR-503-5p	up	miRNA	IL7R	down	mRNA
RP11-876N24.4	down	lncRNA	hsa-miR-503-5p	up	miRNA	IL7R	down	mRNA
RP5-1171I10.5	down	lncRNA	hsa-miR-503-5p	up	miRNA	IL7R	down	mRNA
TRG-AS1	down	lncRNA	hsa-miR-503-5p	up	miRNA	IL7R	down	mRNA
GGTA1P	down	lncRNA	hsa-miR-503-5p	up	miRNA	MARCH1	down	mRNA
GVINP1	down	lncRNA	hsa-miR-503-5p	up	miRNA	MARCH1	down	mRNA
LINC00324	down	lncRNA	hsa-miR-503-5p	up	miRNA	MARCH1	down	mRNA
LINC00426	down	lncRNA	hsa-miR-503-5p	up	miRNA	MARCH1	down	mRNA
LINC00926	down	lncRNA	hsa-miR-503-5p	up	miRNA	MARCH1	down	mRNA
NAPSB	down	lncRNA	hsa-miR-503-5p	up	miRNA	MARCH1	down	mRNA
NPM1P25	down	lncRNA	hsa-miR-503-5p	up	miRNA	MARCH1	down	mRNA
PSMB8-AS1	down	lncRNA	hsa-miR-503-5p	up	miRNA	MARCH1	down	mRNA
RP11-1094M14.8	down	lncRNA	hsa-miR-503-5p	up	miRNA	MARCH1	down	mRNA
RP11-876N24.4	down	lncRNA	hsa-miR-503-5p	up	miRNA	MARCH1	down	mRNA
RP5-1171I10.5	down	lncRNA	hsa-miR-503-5p	up	miRNA	MARCH1	down	mRNA
TRG-AS1	down	lncRNA	hsa-miR-503-5p	up	miRNA	MARCH1	down	mRNA
GGTA1P	down	lncRNA	hsa-miR-503-5p	up	miRNA	PIK3IP1	down	mRNA
GVINP1	down	lncRNA	hsa-miR-503-5p	up	miRNA	PIK3IP1	down	mRNA
LINC00324	down	lncRNA	hsa-miR-503-5p	up	miRNA	PIK3IP1	down	mRNA
LINC00426	down	lncRNA	hsa-miR-503-5p	up	miRNA	PIK3IP1	down	mRNA
LINC00926	down	lncRNA	hsa-miR-503-5p	up	miRNA	PIK3IP1	down	mRNA
NAPSB	down	lncRNA	hsa-miR-503-5p	up	miRNA	PIK3IP1	down	mRNA
NPM1P25	down	lncRNA	hsa-miR-503-5p	up	miRNA	PIK3IP1	down	mRNA
PSMB8-AS1	down	lncRNA	hsa-miR-503-5p	up	miRNA	PIK3IP1	down	mRNA
RP11-1094M14.8	down	lncRNA	hsa-miR-503-5p	up	miRNA	PIK3IP1	down	mRNA
RP11-876N24.4	down	lncRNA	hsa-miR-503-5p	up	miRNA	PIK3IP1	down	mRNA
RP5-1171I10.5	down	lncRNA	hsa-miR-503-5p	up	miRNA	PIK3IP1	down	mRNA
TRG-AS1	down	lncRNA	hsa-miR-503-5p	up	miRNA	PIK3IP1	down	mRNA
GGTA1P	down	lncRNA	hsa-miR-503-5p	up	miRNA	POU2F2	down	mRNA
GVINP1	down	lncRNA	hsa-miR-503-5p	up	miRNA	POU2F2	down	mRNA
LINC00324	down	lncRNA	hsa-miR-503-5p	up	miRNA	POU2F2	down	mRNA
LINC00426	down	lncRNA	hsa-miR-503-5p	up	miRNA	POU2F2	down	mRNA
LINC00926	down	lncRNA	hsa-miR-503-5p	up	miRNA	POU2F2	down	mRNA
NAPSB	down	lncRNA	hsa-miR-503-5p	up	miRNA	POU2F2	down	mRNA
NPM1P25	down	lncRNA	hsa-miR-503-5p	up	miRNA	POU2F2	down	mRNA
PSMB8-AS1	down	lncRNA	hsa-miR-503-5p	up	miRNA	POU2F2	down	mRNA
RP11-1094M14.8	down	lncRNA	hsa-miR-503-5p	up	miRNA	POU2F2	down	mRNA
RP11-876N24.4	down	lncRNA	hsa-miR-503-5p	up	miRNA	POU2F2	down	mRNA
RP5-1171I10.5	down	lncRNA	hsa-miR-503-5p	up	miRNA	POU2F2	down	mRNA
TRG-AS1	down	lncRNA	hsa-miR-503-5p	up	miRNA	POU2F2	down	mRNA
GGTA1P	down	lncRNA	hsa-miR-503-5p	up	miRNA	RUNX3	down	mRNA
GVINP1	down	lncRNA	hsa-miR-503-5p	up	miRNA	RUNX3	down	mRNA
LINC00324	down	lncRNA	hsa-miR-503-5p	up	miRNA	RUNX3	down	mRNA
LINC00426	down	lncRNA	hsa-miR-503-5p	up	miRNA	RUNX3	down	mRNA
LINC00926	down	lncRNA	hsa-miR-503-5p	up	miRNA	RUNX3	down	mRNA
NAPSB	down	lncRNA	hsa-miR-503-5p	up	miRNA	RUNX3	down	mRNA
NPM1P25	down	lncRNA	hsa-miR-503-5p	up	miRNA	RUNX3	down	mRNA
PSMB8-AS1	down	lncRNA	hsa-miR-503-5p	up	miRNA	RUNX3	down	mRNA
RP11-1094M14.8	down	lncRNA	hsa-miR-503-5p	up	miRNA	RUNX3	down	mRNA
RP11-876N24.4	down	lncRNA	hsa-miR-503-5p	up	miRNA	RUNX3	down	mRNA
RP5-1171I10.5	down	lncRNA	hsa-miR-503-5p	up	miRNA	RUNX3	down	mRNA
TRG-AS1	down	lncRNA	hsa-miR-503-5p	up	miRNA	RUNX3	down	mRNA
GGTA1P	down	lncRNA	hsa-miR-503-5p	up	miRNA	TFEC	down	mRNA
GVINP1	down	lncRNA	hsa-miR-503-5p	up	miRNA	TFEC	down	mRNA
LINC00324	down	lncRNA	hsa-miR-503-5p	up	miRNA	TFEC	down	mRNA
LINC00426	down	lncRNA	hsa-miR-503-5p	up	miRNA	TFEC	down	mRNA
LINC00926	down	lncRNA	hsa-miR-503-5p	up	miRNA	TFEC	down	mRNA
NAPSB	down	lncRNA	hsa-miR-503-5p	up	miRNA	TFEC	down	mRNA
NPM1P25	down	lncRNA	hsa-miR-503-5p	up	miRNA	TFEC	down	mRNA
PSMB8-AS1	down	lncRNA	hsa-miR-503-5p	up	miRNA	TFEC	down	mRNA
RP11-1094M14.8	down	lncRNA	hsa-miR-503-5p	up	miRNA	TFEC	down	mRNA
RP11-876N24.4	down	lncRNA	hsa-miR-503-5p	up	miRNA	TFEC	down	mRNA
RP5-1171I10.5	down	lncRNA	hsa-miR-503-5p	up	miRNA	TFEC	down	mRNA
TRG-AS1	down	lncRNA	hsa-miR-503-5p	up	miRNA	TFEC	down	mRNA
GVINP1	down	lncRNA	hsa-miR-33b-5p	up	miRNA	APOBEC3G	down	mRNA
HNRNPA1P21	down	lncRNA	hsa-miR-33b-5p	up	miRNA	APOBEC3G	down	mRNA
LINC00324	down	lncRNA	hsa-miR-33b-5p	up	miRNA	APOBEC3G	down	mRNA
LINC00426	down	lncRNA	hsa-miR-33b-5p	up	miRNA	APOBEC3G	down	mRNA
LINC00892	down	lncRNA	hsa-miR-33b-5p	up	miRNA	APOBEC3G	down	mRNA
LINC00926	down	lncRNA	hsa-miR-33b-5p	up	miRNA	APOBEC3G	down	mRNA
LINC00996	down	lncRNA	hsa-miR-33b-5p	up	miRNA	APOBEC3G	down	mRNA
LINC01215	down	lncRNA	hsa-miR-33b-5p	up	miRNA	APOBEC3G	down	mRNA
LINC01480	down	lncRNA	hsa-miR-33b-5p	up	miRNA	APOBEC3G	down	mRNA
NPM1P25	down	lncRNA	hsa-miR-33b-5p	up	miRNA	APOBEC3G	down	mRNA
PSMB8-AS1	down	lncRNA	hsa-miR-33b-5p	up	miRNA	APOBEC3G	down	mRNA
RP5-1171I10.5	down	lncRNA	hsa-miR-33b-5p	up	miRNA	APOBEC3G	down	mRNA
TRG-AS1	down	lncRNA	hsa-miR-33b-5p	up	miRNA	APOBEC3G	down	mRNA
GVINP1	down	lncRNA	hsa-miR-33b-5p	up	miRNA	CD28	down	mRNA
HNRNPA1P21	down	lncRNA	hsa-miR-33b-5p	up	miRNA	CD28	down	mRNA
LINC00324	down	lncRNA	hsa-miR-33b-5p	up	miRNA	CD28	down	mRNA
LINC00426	down	lncRNA	hsa-miR-33b-5p	up	miRNA	CD28	down	mRNA
LINC00892	down	lncRNA	hsa-miR-33b-5p	up	miRNA	CD28	down	mRNA
LINC00926	down	lncRNA	hsa-miR-33b-5p	up	miRNA	CD28	down	mRNA
LINC00996	down	lncRNA	hsa-miR-33b-5p	up	miRNA	CD28	down	mRNA
LINC01215	down	lncRNA	hsa-miR-33b-5p	up	miRNA	CD28	down	mRNA
LINC01480	down	lncRNA	hsa-miR-33b-5p	up	miRNA	CD28	down	mRNA
NPM1P25	down	lncRNA	hsa-miR-33b-5p	up	miRNA	CD28	down	mRNA
PSMB8-AS1	down	lncRNA	hsa-miR-33b-5p	up	miRNA	CD28	down	mRNA
RP5-1171I10.5	down	lncRNA	hsa-miR-33b-5p	up	miRNA	CD28	down	mRNA
TRG-AS1	down	lncRNA	hsa-miR-33b-5p	up	miRNA	CD28	down	mRNA
GVINP1	down	lncRNA	hsa-miR-33b-5p	up	miRNA	CD3G	down	mRNA
HNRNPA1P21	down	lncRNA	hsa-miR-33b-5p	up	miRNA	CD3G	down	mRNA
LINC00324	down	lncRNA	hsa-miR-33b-5p	up	miRNA	CD3G	down	mRNA
LINC00426	down	lncRNA	hsa-miR-33b-5p	up	miRNA	CD3G	down	mRNA
LINC00892	down	lncRNA	hsa-miR-33b-5p	up	miRNA	CD3G	down	mRNA
LINC00926	down	lncRNA	hsa-miR-33b-5p	up	miRNA	CD3G	down	mRNA
LINC00996	down	lncRNA	hsa-miR-33b-5p	up	miRNA	CD3G	down	mRNA
LINC01215	down	lncRNA	hsa-miR-33b-5p	up	miRNA	CD3G	down	mRNA
LINC01480	down	lncRNA	hsa-miR-33b-5p	up	miRNA	CD3G	down	mRNA
NPM1P25	down	lncRNA	hsa-miR-33b-5p	up	miRNA	CD3G	down	mRNA
PSMB8-AS1	down	lncRNA	hsa-miR-33b-5p	up	miRNA	CD3G	down	mRNA
RP5-1171I10.5	down	lncRNA	hsa-miR-33b-5p	up	miRNA	CD3G	down	mRNA
TRG-AS1	down	lncRNA	hsa-miR-33b-5p	up	miRNA	CD3G	down	mRNA
GVINP1	down	lncRNA	hsa-miR-33b-5p	up	miRNA	FMNL3	down	mRNA
HNRNPA1P21	down	lncRNA	hsa-miR-33b-5p	up	miRNA	FMNL3	down	mRNA
LINC00324	down	lncRNA	hsa-miR-33b-5p	up	miRNA	FMNL3	down	mRNA
LINC00426	down	lncRNA	hsa-miR-33b-5p	up	miRNA	FMNL3	down	mRNA
LINC00892	down	lncRNA	hsa-miR-33b-5p	up	miRNA	FMNL3	down	mRNA
LINC00926	down	lncRNA	hsa-miR-33b-5p	up	miRNA	FMNL3	down	mRNA
LINC00996	down	lncRNA	hsa-miR-33b-5p	up	miRNA	FMNL3	down	mRNA
LINC01215	down	lncRNA	hsa-miR-33b-5p	up	miRNA	FMNL3	down	mRNA
LINC01480	down	lncRNA	hsa-miR-33b-5p	up	miRNA	FMNL3	down	mRNA
NPM1P25	down	lncRNA	hsa-miR-33b-5p	up	miRNA	FMNL3	down	mRNA
PSMB8-AS1	down	lncRNA	hsa-miR-33b-5p	up	miRNA	FMNL3	down	mRNA
RP5-1171I10.5	down	lncRNA	hsa-miR-33b-5p	up	miRNA	FMNL3	down	mRNA
TRG-AS1	down	lncRNA	hsa-miR-33b-5p	up	miRNA	FMNL3	down	mRNA
GVINP1	down	lncRNA	hsa-miR-33b-5p	up	miRNA	IKZF1	down	mRNA
HNRNPA1P21	down	lncRNA	hsa-miR-33b-5p	up	miRNA	IKZF1	down	mRNA
LINC00324	down	lncRNA	hsa-miR-33b-5p	up	miRNA	IKZF1	down	mRNA
LINC00426	down	lncRNA	hsa-miR-33b-5p	up	miRNA	IKZF1	down	mRNA
LINC00892	down	lncRNA	hsa-miR-33b-5p	up	miRNA	IKZF1	down	mRNA
LINC00926	down	lncRNA	hsa-miR-33b-5p	up	miRNA	IKZF1	down	mRNA
LINC00996	down	lncRNA	hsa-miR-33b-5p	up	miRNA	IKZF1	down	mRNA
LINC01215	down	lncRNA	hsa-miR-33b-5p	up	miRNA	IKZF1	down	mRNA
LINC01480	down	lncRNA	hsa-miR-33b-5p	up	miRNA	IKZF1	down	mRNA
NPM1P25	down	lncRNA	hsa-miR-33b-5p	up	miRNA	IKZF1	down	mRNA
PSMB8-AS1	down	lncRNA	hsa-miR-33b-5p	up	miRNA	IKZF1	down	mRNA
RP5-1171I10.5	down	lncRNA	hsa-miR-33b-5p	up	miRNA	IKZF1	down	mRNA
TRG-AS1	down	lncRNA	hsa-miR-33b-5p	up	miRNA	IKZF1	down	mRNA
GVINP1	down	lncRNA	hsa-miR-33b-5p	up	miRNA	LDLRAD4	down	mRNA
HNRNPA1P21	down	lncRNA	hsa-miR-33b-5p	up	miRNA	LDLRAD4	down	mRNA
LINC00324	down	lncRNA	hsa-miR-33b-5p	up	miRNA	LDLRAD4	down	mRNA
LINC00426	down	lncRNA	hsa-miR-33b-5p	up	miRNA	LDLRAD4	down	mRNA
LINC00892	down	lncRNA	hsa-miR-33b-5p	up	miRNA	LDLRAD4	down	mRNA
LINC00926	down	lncRNA	hsa-miR-33b-5p	up	miRNA	LDLRAD4	down	mRNA
LINC00996	down	lncRNA	hsa-miR-33b-5p	up	miRNA	LDLRAD4	down	mRNA
LINC01215	down	lncRNA	hsa-miR-33b-5p	up	miRNA	LDLRAD4	down	mRNA
LINC01480	down	lncRNA	hsa-miR-33b-5p	up	miRNA	LDLRAD4	down	mRNA
NPM1P25	down	lncRNA	hsa-miR-33b-5p	up	miRNA	LDLRAD4	down	mRNA
PSMB8-AS1	down	lncRNA	hsa-miR-33b-5p	up	miRNA	LDLRAD4	down	mRNA
RP5-1171I10.5	down	lncRNA	hsa-miR-33b-5p	up	miRNA	LDLRAD4	down	mRNA
TRG-AS1	down	lncRNA	hsa-miR-33b-5p	up	miRNA	LDLRAD4	down	mRNA
GVINP1	down	lncRNA	hsa-miR-33b-5p	up	miRNA	SLC9A9	down	mRNA
HNRNPA1P21	down	lncRNA	hsa-miR-33b-5p	up	miRNA	SLC9A9	down	mRNA
LINC00324	down	lncRNA	hsa-miR-33b-5p	up	miRNA	SLC9A9	down	mRNA
LINC00426	down	lncRNA	hsa-miR-33b-5p	up	miRNA	SLC9A9	down	mRNA
LINC00892	down	lncRNA	hsa-miR-33b-5p	up	miRNA	SLC9A9	down	mRNA
LINC00926	down	lncRNA	hsa-miR-33b-5p	up	miRNA	SLC9A9	down	mRNA
LINC00996	down	lncRNA	hsa-miR-33b-5p	up	miRNA	SLC9A9	down	mRNA
LINC01215	down	lncRNA	hsa-miR-33b-5p	up	miRNA	SLC9A9	down	mRNA
LINC01480	down	lncRNA	hsa-miR-33b-5p	up	miRNA	SLC9A9	down	mRNA
NPM1P25	down	lncRNA	hsa-miR-33b-5p	up	miRNA	SLC9A9	down	mRNA
PSMB8-AS1	down	lncRNA	hsa-miR-33b-5p	up	miRNA	SLC9A9	down	mRNA
RP5-1171I10.5	down	lncRNA	hsa-miR-33b-5p	up	miRNA	SLC9A9	down	mRNA
TRG-AS1	down	lncRNA	hsa-miR-33b-5p	up	miRNA	SLC9A9	down	mRNA
GVINP1	down	lncRNA	hsa-miR-33b-5p	up	miRNA	STAT5A	down	mRNA
HNRNPA1P21	down	lncRNA	hsa-miR-33b-5p	up	miRNA	STAT5A	down	mRNA
LINC00324	down	lncRNA	hsa-miR-33b-5p	up	miRNA	STAT5A	down	mRNA
LINC00426	down	lncRNA	hsa-miR-33b-5p	up	miRNA	STAT5A	down	mRNA
LINC00892	down	lncRNA	hsa-miR-33b-5p	up	miRNA	STAT5A	down	mRNA
LINC00926	down	lncRNA	hsa-miR-33b-5p	up	miRNA	STAT5A	down	mRNA
LINC00996	down	lncRNA	hsa-miR-33b-5p	up	miRNA	STAT5A	down	mRNA
LINC01215	down	lncRNA	hsa-miR-33b-5p	up	miRNA	STAT5A	down	mRNA
LINC01480	down	lncRNA	hsa-miR-33b-5p	up	miRNA	STAT5A	down	mRNA
NPM1P25	down	lncRNA	hsa-miR-33b-5p	up	miRNA	STAT5A	down	mRNA
PSMB8-AS1	down	lncRNA	hsa-miR-33b-5p	up	miRNA	STAT5A	down	mRNA
RP5-1171I10.5	down	lncRNA	hsa-miR-33b-5p	up	miRNA	STAT5A	down	mRNA
TRG-AS1	down	lncRNA	hsa-miR-33b-5p	up	miRNA	STAT5A	down	mRNA
GVINP1	down	lncRNA	hsa-miR-33b-5p	up	miRNA	TLR7	down	mRNA
HNRNPA1P21	down	lncRNA	hsa-miR-33b-5p	up	miRNA	TLR7	down	mRNA
LINC00324	down	lncRNA	hsa-miR-33b-5p	up	miRNA	TLR7	down	mRNA
LINC00426	down	lncRNA	hsa-miR-33b-5p	up	miRNA	TLR7	down	mRNA
LINC00892	down	lncRNA	hsa-miR-33b-5p	up	miRNA	TLR7	down	mRNA
LINC00926	down	lncRNA	hsa-miR-33b-5p	up	miRNA	TLR7	down	mRNA
LINC00996	down	lncRNA	hsa-miR-33b-5p	up	miRNA	TLR7	down	mRNA
LINC01215	down	lncRNA	hsa-miR-33b-5p	up	miRNA	TLR7	down	mRNA
LINC01480	down	lncRNA	hsa-miR-33b-5p	up	miRNA	TLR7	down	mRNA
NPM1P25	down	lncRNA	hsa-miR-33b-5p	up	miRNA	TLR7	down	mRNA
PSMB8-AS1	down	lncRNA	hsa-miR-33b-5p	up	miRNA	TLR7	down	mRNA
RP5-1171I10.5	down	lncRNA	hsa-miR-33b-5p	up	miRNA	TLR7	down	mRNA
TRG-AS1	down	lncRNA	hsa-miR-33b-5p	up	miRNA	TLR7	down	mRNA
AC006129.2	down	lncRNA	hsa-miR-210-3p	up	miRNA	CD22	down	mRNA
AF131215.2	down	lncRNA	hsa-miR-210-3p	up	miRNA	CD22	down	mRNA
GGTA1P	down	lncRNA	hsa-miR-210-3p	up	miRNA	CD22	down	mRNA
HLA-DQB1-AS1	down	lncRNA	hsa-miR-210-3p	up	miRNA	CD22	down	mRNA
LINC00324	down	lncRNA	hsa-miR-210-3p	up	miRNA	CD22	down	mRNA
LINC00426	down	lncRNA	hsa-miR-210-3p	up	miRNA	CD22	down	mRNA
LINC00926	down	lncRNA	hsa-miR-210-3p	up	miRNA	CD22	down	mRNA
LINC00996	down	lncRNA	hsa-miR-210-3p	up	miRNA	CD22	down	mRNA
NAPSB	down	lncRNA	hsa-miR-210-3p	up	miRNA	CD22	down	mRNA
NCF1C	down	lncRNA	hsa-miR-210-3p	up	miRNA	CD22	down	mRNA
PCED1B-AS1	down	lncRNA	hsa-miR-210-3p	up	miRNA	CD22	down	mRNA
PSMB8-AS1	down	lncRNA	hsa-miR-210-3p	up	miRNA	CD22	down	mRNA
TRG-AS1	down	lncRNA	hsa-miR-210-3p	up	miRNA	CD22	down	mRNA
AC006129.2	down	lncRNA	hsa-miR-210-3p	up	miRNA	EVL	down	mRNA
AF131215.2	down	lncRNA	hsa-miR-210-3p	up	miRNA	EVL	down	mRNA
GGTA1P	down	lncRNA	hsa-miR-210-3p	up	miRNA	EVL	down	mRNA
HLA-DQB1-AS1	down	lncRNA	hsa-miR-210-3p	up	miRNA	EVL	down	mRNA
LINC00324	down	lncRNA	hsa-miR-210-3p	up	miRNA	EVL	down	mRNA
LINC00426	down	lncRNA	hsa-miR-210-3p	up	miRNA	EVL	down	mRNA
LINC00926	down	lncRNA	hsa-miR-210-3p	up	miRNA	EVL	down	mRNA
LINC00996	down	lncRNA	hsa-miR-210-3p	up	miRNA	EVL	down	mRNA
NAPSB	down	lncRNA	hsa-miR-210-3p	up	miRNA	EVL	down	mRNA
NCF1C	down	lncRNA	hsa-miR-210-3p	up	miRNA	EVL	down	mRNA
PCED1B-AS1	down	lncRNA	hsa-miR-210-3p	up	miRNA	EVL	down	mRNA
PSMB8-AS1	down	lncRNA	hsa-miR-210-3p	up	miRNA	EVL	down	mRNA
TRG-AS1	down	lncRNA	hsa-miR-210-3p	up	miRNA	EVL	down	mRNA
AC006129.2	down	lncRNA	hsa-miR-210-3p	up	miRNA	FOXP3	down	mRNA
AF131215.2	down	lncRNA	hsa-miR-210-3p	up	miRNA	FOXP3	down	mRNA
GGTA1P	down	lncRNA	hsa-miR-210-3p	up	miRNA	FOXP3	down	mRNA
HLA-DQB1-AS1	down	lncRNA	hsa-miR-210-3p	up	miRNA	FOXP3	down	mRNA
LINC00324	down	lncRNA	hsa-miR-210-3p	up	miRNA	FOXP3	down	mRNA
LINC00426	down	lncRNA	hsa-miR-210-3p	up	miRNA	FOXP3	down	mRNA
LINC00926	down	lncRNA	hsa-miR-210-3p	up	miRNA	FOXP3	down	mRNA
LINC00996	down	lncRNA	hsa-miR-210-3p	up	miRNA	FOXP3	down	mRNA
NAPSB	down	lncRNA	hsa-miR-210-3p	up	miRNA	FOXP3	down	mRNA
NCF1C	down	lncRNA	hsa-miR-210-3p	up	miRNA	FOXP3	down	mRNA
PCED1B-AS1	down	lncRNA	hsa-miR-210-3p	up	miRNA	FOXP3	down	mRNA
PSMB8-AS1	down	lncRNA	hsa-miR-210-3p	up	miRNA	FOXP3	down	mRNA
TRG-AS1	down	lncRNA	hsa-miR-210-3p	up	miRNA	FOXP3	down	mRNA
AC006129.2	down	lncRNA	hsa-miR-210-3p	up	miRNA	GNG7	down	mRNA
AF131215.2	down	lncRNA	hsa-miR-210-3p	up	miRNA	GNG7	down	mRNA
GGTA1P	down	lncRNA	hsa-miR-210-3p	up	miRNA	GNG7	down	mRNA
HLA-DQB1-AS1	down	lncRNA	hsa-miR-210-3p	up	miRNA	GNG7	down	mRNA
LINC00324	down	lncRNA	hsa-miR-210-3p	up	miRNA	GNG7	down	mRNA
LINC00426	down	lncRNA	hsa-miR-210-3p	up	miRNA	GNG7	down	mRNA
LINC00926	down	lncRNA	hsa-miR-210-3p	up	miRNA	GNG7	down	mRNA
LINC00996	down	lncRNA	hsa-miR-210-3p	up	miRNA	GNG7	down	mRNA
NAPSB	down	lncRNA	hsa-miR-210-3p	up	miRNA	GNG7	down	mRNA
NCF1C	down	lncRNA	hsa-miR-210-3p	up	miRNA	GNG7	down	mRNA
PCED1B-AS1	down	lncRNA	hsa-miR-210-3p	up	miRNA	GNG7	down	mRNA
PSMB8-AS1	down	lncRNA	hsa-miR-210-3p	up	miRNA	GNG7	down	mRNA
TRG-AS1	down	lncRNA	hsa-miR-210-3p	up	miRNA	GNG7	down	mRNA
AC006129.2	down	lncRNA	hsa-miR-210-3p	up	miRNA	IL16	down	mRNA
AF131215.2	down	lncRNA	hsa-miR-210-3p	up	miRNA	IL16	down	mRNA
GGTA1P	down	lncRNA	hsa-miR-210-3p	up	miRNA	IL16	down	mRNA
HLA-DQB1-AS1	down	lncRNA	hsa-miR-210-3p	up	miRNA	IL16	down	mRNA
LINC00324	down	lncRNA	hsa-miR-210-3p	up	miRNA	IL16	down	mRNA
LINC00426	down	lncRNA	hsa-miR-210-3p	up	miRNA	IL16	down	mRNA
LINC00926	down	lncRNA	hsa-miR-210-3p	up	miRNA	IL16	down	mRNA
LINC00996	down	lncRNA	hsa-miR-210-3p	up	miRNA	IL16	down	mRNA
NAPSB	down	lncRNA	hsa-miR-210-3p	up	miRNA	IL16	down	mRNA
NCF1C	down	lncRNA	hsa-miR-210-3p	up	miRNA	IL16	down	mRNA
PCED1B-AS1	down	lncRNA	hsa-miR-210-3p	up	miRNA	IL16	down	mRNA
PSMB8-AS1	down	lncRNA	hsa-miR-210-3p	up	miRNA	IL16	down	mRNA
TRG-AS1	down	lncRNA	hsa-miR-210-3p	up	miRNA	IL16	down	mRNA
AC006129.2	down	lncRNA	hsa-miR-210-3p	up	miRNA	PAX5	down	mRNA
AF131215.2	down	lncRNA	hsa-miR-210-3p	up	miRNA	PAX5	down	mRNA
GGTA1P	down	lncRNA	hsa-miR-210-3p	up	miRNA	PAX5	down	mRNA
HLA-DQB1-AS1	down	lncRNA	hsa-miR-210-3p	up	miRNA	PAX5	down	mRNA
LINC00324	down	lncRNA	hsa-miR-210-3p	up	miRNA	PAX5	down	mRNA
LINC00426	down	lncRNA	hsa-miR-210-3p	up	miRNA	PAX5	down	mRNA
LINC00926	down	lncRNA	hsa-miR-210-3p	up	miRNA	PAX5	down	mRNA
LINC00996	down	lncRNA	hsa-miR-210-3p	up	miRNA	PAX5	down	mRNA
NAPSB	down	lncRNA	hsa-miR-210-3p	up	miRNA	PAX5	down	mRNA
NCF1C	down	lncRNA	hsa-miR-210-3p	up	miRNA	PAX5	down	mRNA
PCED1B-AS1	down	lncRNA	hsa-miR-210-3p	up	miRNA	PAX5	down	mRNA
PSMB8-AS1	down	lncRNA	hsa-miR-210-3p	up	miRNA	PAX5	down	mRNA
TRG-AS1	down	lncRNA	hsa-miR-210-3p	up	miRNA	PAX5	down	mRNA
AC006129.2	down	lncRNA	hsa-miR-210-3p	up	miRNA	SH3BGRL	down	mRNA
AF131215.2	down	lncRNA	hsa-miR-210-3p	up	miRNA	SH3BGRL	down	mRNA
GGTA1P	down	lncRNA	hsa-miR-210-3p	up	miRNA	SH3BGRL	down	mRNA
HLA-DQB1-AS1	down	lncRNA	hsa-miR-210-3p	up	miRNA	SH3BGRL	down	mRNA
LINC00324	down	lncRNA	hsa-miR-210-3p	up	miRNA	SH3BGRL	down	mRNA
LINC00426	down	lncRNA	hsa-miR-210-3p	up	miRNA	SH3BGRL	down	mRNA
LINC00926	down	lncRNA	hsa-miR-210-3p	up	miRNA	SH3BGRL	down	mRNA
LINC00996	down	lncRNA	hsa-miR-210-3p	up	miRNA	SH3BGRL	down	mRNA
NAPSB	down	lncRNA	hsa-miR-210-3p	up	miRNA	SH3BGRL	down	mRNA
NCF1C	down	lncRNA	hsa-miR-210-3p	up	miRNA	SH3BGRL	down	mRNA
PCED1B-AS1	down	lncRNA	hsa-miR-210-3p	up	miRNA	SH3BGRL	down	mRNA
PSMB8-AS1	down	lncRNA	hsa-miR-210-3p	up	miRNA	SH3BGRL	down	mRNA
TRG-AS1	down	lncRNA	hsa-miR-210-3p	up	miRNA	SH3BGRL	down	mRNA
AC079767.4	down	lncRNA	hsa-miR-196b-5p	up	miRNA	CD84	down	mRNA
GGTA1P	down	lncRNA	hsa-miR-196b-5p	up	miRNA	CD84	down	mRNA
GVINP1	down	lncRNA	hsa-miR-196b-5p	up	miRNA	CD84	down	mRNA
LINC00926	down	lncRNA	hsa-miR-196b-5p	up	miRNA	CD84	down	mRNA
LINC01215	down	lncRNA	hsa-miR-196b-5p	up	miRNA	CD84	down	mRNA
LLNLR-470E3.1	down	lncRNA	hsa-miR-196b-5p	up	miRNA	CD84	down	mRNA
MIR155HG	down	lncRNA	hsa-miR-196b-5p	up	miRNA	CD84	down	mRNA
NPM1P25	down	lncRNA	hsa-miR-196b-5p	up	miRNA	CD84	down	mRNA
PCED1B-AS1	down	lncRNA	hsa-miR-196b-5p	up	miRNA	CD84	down	mRNA
RP11-1094M14.8	down	lncRNA	hsa-miR-196b-5p	up	miRNA	CD84	down	mRNA
RP11-473M20.9	down	lncRNA	hsa-miR-196b-5p	up	miRNA	CD84	down	mRNA
TRG-AS1	down	lncRNA	hsa-miR-196b-5p	up	miRNA	CD84	down	mRNA
AC079767.4	down	lncRNA	hsa-miR-196b-5p	up	miRNA	FMNL3	down	mRNA
GGTA1P	down	lncRNA	hsa-miR-196b-5p	up	miRNA	FMNL3	down	mRNA
GVINP1	down	lncRNA	hsa-miR-196b-5p	up	miRNA	FMNL3	down	mRNA
LINC00926	down	lncRNA	hsa-miR-196b-5p	up	miRNA	FMNL3	down	mRNA
LINC01215	down	lncRNA	hsa-miR-196b-5p	up	miRNA	FMNL3	down	mRNA
LLNLR-470E3.1	down	lncRNA	hsa-miR-196b-5p	up	miRNA	FMNL3	down	mRNA
MIR155HG	down	lncRNA	hsa-miR-196b-5p	up	miRNA	FMNL3	down	mRNA
NPM1P25	down	lncRNA	hsa-miR-196b-5p	up	miRNA	FMNL3	down	mRNA
PCED1B-AS1	down	lncRNA	hsa-miR-196b-5p	up	miRNA	FMNL3	down	mRNA
RP11-1094M14.8	down	lncRNA	hsa-miR-196b-5p	up	miRNA	FMNL3	down	mRNA
RP11-473M20.9	down	lncRNA	hsa-miR-196b-5p	up	miRNA	FMNL3	down	mRNA
TRG-AS1	down	lncRNA	hsa-miR-196b-5p	up	miRNA	FMNL3	down	mRNA
AC079767.4	down	lncRNA	hsa-miR-196b-5p	up	miRNA	IKZF1	down	mRNA
GGTA1P	down	lncRNA	hsa-miR-196b-5p	up	miRNA	IKZF1	down	mRNA
GVINP1	down	lncRNA	hsa-miR-196b-5p	up	miRNA	IKZF1	down	mRNA
LINC00926	down	lncRNA	hsa-miR-196b-5p	up	miRNA	IKZF1	down	mRNA
LINC01215	down	lncRNA	hsa-miR-196b-5p	up	miRNA	IKZF1	down	mRNA
LLNLR-470E3.1	down	lncRNA	hsa-miR-196b-5p	up	miRNA	IKZF1	down	mRNA
MIR155HG	down	lncRNA	hsa-miR-196b-5p	up	miRNA	IKZF1	down	mRNA
NPM1P25	down	lncRNA	hsa-miR-196b-5p	up	miRNA	IKZF1	down	mRNA
PCED1B-AS1	down	lncRNA	hsa-miR-196b-5p	up	miRNA	IKZF1	down	mRNA
RP11-1094M14.8	down	lncRNA	hsa-miR-196b-5p	up	miRNA	IKZF1	down	mRNA
RP11-473M20.9	down	lncRNA	hsa-miR-196b-5p	up	miRNA	IKZF1	down	mRNA
TRG-AS1	down	lncRNA	hsa-miR-196b-5p	up	miRNA	IKZF1	down	mRNA
AC079767.4	down	lncRNA	hsa-miR-196b-5p	up	miRNA	IKZF3	down	mRNA
GGTA1P	down	lncRNA	hsa-miR-196b-5p	up	miRNA	IKZF3	down	mRNA
GVINP1	down	lncRNA	hsa-miR-196b-5p	up	miRNA	IKZF3	down	mRNA
LINC00926	down	lncRNA	hsa-miR-196b-5p	up	miRNA	IKZF3	down	mRNA
LINC01215	down	lncRNA	hsa-miR-196b-5p	up	miRNA	IKZF3	down	mRNA
LLNLR-470E3.1	down	lncRNA	hsa-miR-196b-5p	up	miRNA	IKZF3	down	mRNA
MIR155HG	down	lncRNA	hsa-miR-196b-5p	up	miRNA	IKZF3	down	mRNA
NPM1P25	down	lncRNA	hsa-miR-196b-5p	up	miRNA	IKZF3	down	mRNA
PCED1B-AS1	down	lncRNA	hsa-miR-196b-5p	up	miRNA	IKZF3	down	mRNA
RP11-1094M14.8	down	lncRNA	hsa-miR-196b-5p	up	miRNA	IKZF3	down	mRNA
RP11-473M20.9	down	lncRNA	hsa-miR-196b-5p	up	miRNA	IKZF3	down	mRNA
TRG-AS1	down	lncRNA	hsa-miR-196b-5p	up	miRNA	IKZF3	down	mRNA
AC079767.4	down	lncRNA	hsa-miR-196b-5p	up	miRNA	PRKCB	down	mRNA
GGTA1P	down	lncRNA	hsa-miR-196b-5p	up	miRNA	PRKCB	down	mRNA
GVINP1	down	lncRNA	hsa-miR-196b-5p	up	miRNA	PRKCB	down	mRNA
LINC00926	down	lncRNA	hsa-miR-196b-5p	up	miRNA	PRKCB	down	mRNA
LINC01215	down	lncRNA	hsa-miR-196b-5p	up	miRNA	PRKCB	down	mRNA
LLNLR-470E3.1	down	lncRNA	hsa-miR-196b-5p	up	miRNA	PRKCB	down	mRNA
MIR155HG	down	lncRNA	hsa-miR-196b-5p	up	miRNA	PRKCB	down	mRNA
NPM1P25	down	lncRNA	hsa-miR-196b-5p	up	miRNA	PRKCB	down	mRNA
PCED1B-AS1	down	lncRNA	hsa-miR-196b-5p	up	miRNA	PRKCB	down	mRNA
RP11-1094M14.8	down	lncRNA	hsa-miR-196b-5p	up	miRNA	PRKCB	down	mRNA
RP11-473M20.9	down	lncRNA	hsa-miR-196b-5p	up	miRNA	PRKCB	down	mRNA
TRG-AS1	down	lncRNA	hsa-miR-196b-5p	up	miRNA	PRKCB	down	mRNA
AC079767.4	down	lncRNA	hsa-miR-196b-5p	up	miRNA	SH2B3	down	mRNA
GGTA1P	down	lncRNA	hsa-miR-196b-5p	up	miRNA	SH2B3	down	mRNA
GVINP1	down	lncRNA	hsa-miR-196b-5p	up	miRNA	SH2B3	down	mRNA
LINC00926	down	lncRNA	hsa-miR-196b-5p	up	miRNA	SH2B3	down	mRNA
LINC01215	down	lncRNA	hsa-miR-196b-5p	up	miRNA	SH2B3	down	mRNA
LLNLR-470E3.1	down	lncRNA	hsa-miR-196b-5p	up	miRNA	SH2B3	down	mRNA
MIR155HG	down	lncRNA	hsa-miR-196b-5p	up	miRNA	SH2B3	down	mRNA
NPM1P25	down	lncRNA	hsa-miR-196b-5p	up	miRNA	SH2B3	down	mRNA
PCED1B-AS1	down	lncRNA	hsa-miR-196b-5p	up	miRNA	SH2B3	down	mRNA
RP11-1094M14.8	down	lncRNA	hsa-miR-196b-5p	up	miRNA	SH2B3	down	mRNA
RP11-473M20.9	down	lncRNA	hsa-miR-196b-5p	up	miRNA	SH2B3	down	mRNA
TRG-AS1	down	lncRNA	hsa-miR-196b-5p	up	miRNA	SH2B3	down	mRNA
AC079767.4	down	lncRNA	hsa-miR-196b-5p	up	miRNA	TESPA1	down	mRNA
GGTA1P	down	lncRNA	hsa-miR-196b-5p	up	miRNA	TESPA1	down	mRNA
GVINP1	down	lncRNA	hsa-miR-196b-5p	up	miRNA	TESPA1	down	mRNA
LINC00926	down	lncRNA	hsa-miR-196b-5p	up	miRNA	TESPA1	down	mRNA
LINC01215	down	lncRNA	hsa-miR-196b-5p	up	miRNA	TESPA1	down	mRNA
LLNLR-470E3.1	down	lncRNA	hsa-miR-196b-5p	up	miRNA	TESPA1	down	mRNA
MIR155HG	down	lncRNA	hsa-miR-196b-5p	up	miRNA	TESPA1	down	mRNA
NPM1P25	down	lncRNA	hsa-miR-196b-5p	up	miRNA	TESPA1	down	mRNA
PCED1B-AS1	down	lncRNA	hsa-miR-196b-5p	up	miRNA	TESPA1	down	mRNA
RP11-1094M14.8	down	lncRNA	hsa-miR-196b-5p	up	miRNA	TESPA1	down	mRNA
RP11-473M20.9	down	lncRNA	hsa-miR-196b-5p	up	miRNA	TESPA1	down	mRNA
TRG-AS1	down	lncRNA	hsa-miR-196b-5p	up	miRNA	TESPA1	down	mRNA
AF131215.2	down	lncRNA	hsa-miR-18a-5p	up	miRNA	GNG7	down	mRNA
GGTA1P	down	lncRNA	hsa-miR-18a-5p	up	miRNA	GNG7	down	mRNA
GVINP1	down	lncRNA	hsa-miR-18a-5p	up	miRNA	GNG7	down	mRNA
LINC00426	down	lncRNA	hsa-miR-18a-5p	up	miRNA	GNG7	down	mRNA
LINC00892	down	lncRNA	hsa-miR-18a-5p	up	miRNA	GNG7	down	mRNA
LINC00926	down	lncRNA	hsa-miR-18a-5p	up	miRNA	GNG7	down	mRNA
LINC00996	down	lncRNA	hsa-miR-18a-5p	up	miRNA	GNG7	down	mRNA
LINC01215	down	lncRNA	hsa-miR-18a-5p	up	miRNA	GNG7	down	mRNA
LLNLR-470E3.1	down	lncRNA	hsa-miR-18a-5p	up	miRNA	GNG7	down	mRNA
NCF1B	down	lncRNA	hsa-miR-18a-5p	up	miRNA	GNG7	down	mRNA
NPM1P25	down	lncRNA	hsa-miR-18a-5p	up	miRNA	GNG7	down	mRNA
PSMB8-AS1	down	lncRNA	hsa-miR-18a-5p	up	miRNA	GNG7	down	mRNA
RP11-1334A24.6	down	lncRNA	hsa-miR-18a-5p	up	miRNA	GNG7	down	mRNA
RP11-731F5.2	down	lncRNA	hsa-miR-18a-5p	up	miRNA	GNG7	down	mRNA
RP11-876N24.4	down	lncRNA	hsa-miR-18a-5p	up	miRNA	GNG7	down	mRNA
RP5-1171I10.5	down	lncRNA	hsa-miR-18a-5p	up	miRNA	GNG7	down	mRNA
TRG-AS1	down	lncRNA	hsa-miR-18a-5p	up	miRNA	GNG7	down	mRNA
AF131215.2	down	lncRNA	hsa-miR-18a-5p	up	miRNA	IL7R	down	mRNA
GGTA1P	down	lncRNA	hsa-miR-18a-5p	up	miRNA	IL7R	down	mRNA
GVINP1	down	lncRNA	hsa-miR-18a-5p	up	miRNA	IL7R	down	mRNA
LINC00426	down	lncRNA	hsa-miR-18a-5p	up	miRNA	IL7R	down	mRNA
LINC00892	down	lncRNA	hsa-miR-18a-5p	up	miRNA	IL7R	down	mRNA
LINC00926	down	lncRNA	hsa-miR-18a-5p	up	miRNA	IL7R	down	mRNA
LINC00996	down	lncRNA	hsa-miR-18a-5p	up	miRNA	IL7R	down	mRNA
LINC01215	down	lncRNA	hsa-miR-18a-5p	up	miRNA	IL7R	down	mRNA
LLNLR-470E3.1	down	lncRNA	hsa-miR-18a-5p	up	miRNA	IL7R	down	mRNA
NCF1B	down	lncRNA	hsa-miR-18a-5p	up	miRNA	IL7R	down	mRNA
NPM1P25	down	lncRNA	hsa-miR-18a-5p	up	miRNA	IL7R	down	mRNA
PSMB8-AS1	down	lncRNA	hsa-miR-18a-5p	up	miRNA	IL7R	down	mRNA
RP11-1334A24.6	down	lncRNA	hsa-miR-18a-5p	up	miRNA	IL7R	down	mRNA
RP11-731F5.2	down	lncRNA	hsa-miR-18a-5p	up	miRNA	IL7R	down	mRNA
RP11-876N24.4	down	lncRNA	hsa-miR-18a-5p	up	miRNA	IL7R	down	mRNA
RP5-1171I10.5	down	lncRNA	hsa-miR-18a-5p	up	miRNA	IL7R	down	mRNA
TRG-AS1	down	lncRNA	hsa-miR-18a-5p	up	miRNA	IL7R	down	mRNA
AF131215.2	down	lncRNA	hsa-miR-18a-5p	up	miRNA	LCK	down	mRNA
GGTA1P	down	lncRNA	hsa-miR-18a-5p	up	miRNA	LCK	down	mRNA
GVINP1	down	lncRNA	hsa-miR-18a-5p	up	miRNA	LCK	down	mRNA
LINC00426	down	lncRNA	hsa-miR-18a-5p	up	miRNA	LCK	down	mRNA
LINC00892	down	lncRNA	hsa-miR-18a-5p	up	miRNA	LCK	down	mRNA
LINC00926	down	lncRNA	hsa-miR-18a-5p	up	miRNA	LCK	down	mRNA
LINC00996	down	lncRNA	hsa-miR-18a-5p	up	miRNA	LCK	down	mRNA
LINC01215	down	lncRNA	hsa-miR-18a-5p	up	miRNA	LCK	down	mRNA
LLNLR-470E3.1	down	lncRNA	hsa-miR-18a-5p	up	miRNA	LCK	down	mRNA
NCF1B	down	lncRNA	hsa-miR-18a-5p	up	miRNA	LCK	down	mRNA
NPM1P25	down	lncRNA	hsa-miR-18a-5p	up	miRNA	LCK	down	mRNA
PSMB8-AS1	down	lncRNA	hsa-miR-18a-5p	up	miRNA	LCK	down	mRNA
RP11-1334A24.6	down	lncRNA	hsa-miR-18a-5p	up	miRNA	LCK	down	mRNA
RP11-731F5.2	down	lncRNA	hsa-miR-18a-5p	up	miRNA	LCK	down	mRNA
RP11-876N24.4	down	lncRNA	hsa-miR-18a-5p	up	miRNA	LCK	down	mRNA
RP5-1171I10.5	down	lncRNA	hsa-miR-18a-5p	up	miRNA	LCK	down	mRNA
TRG-AS1	down	lncRNA	hsa-miR-18a-5p	up	miRNA	LCK	down	mRNA
AF131215.2	down	lncRNA	hsa-miR-18a-5p	up	miRNA	PAX5	down	mRNA
GGTA1P	down	lncRNA	hsa-miR-18a-5p	up	miRNA	PAX5	down	mRNA
GVINP1	down	lncRNA	hsa-miR-18a-5p	up	miRNA	PAX5	down	mRNA
LINC00426	down	lncRNA	hsa-miR-18a-5p	up	miRNA	PAX5	down	mRNA
LINC00892	down	lncRNA	hsa-miR-18a-5p	up	miRNA	PAX5	down	mRNA
LINC00926	down	lncRNA	hsa-miR-18a-5p	up	miRNA	PAX5	down	mRNA
LINC00996	down	lncRNA	hsa-miR-18a-5p	up	miRNA	PAX5	down	mRNA
LINC01215	down	lncRNA	hsa-miR-18a-5p	up	miRNA	PAX5	down	mRNA
LLNLR-470E3.1	down	lncRNA	hsa-miR-18a-5p	up	miRNA	PAX5	down	mRNA
NCF1B	down	lncRNA	hsa-miR-18a-5p	up	miRNA	PAX5	down	mRNA
NPM1P25	down	lncRNA	hsa-miR-18a-5p	up	miRNA	PAX5	down	mRNA
PSMB8-AS1	down	lncRNA	hsa-miR-18a-5p	up	miRNA	PAX5	down	mRNA
RP11-1334A24.6	down	lncRNA	hsa-miR-18a-5p	up	miRNA	PAX5	down	mRNA
RP11-731F5.2	down	lncRNA	hsa-miR-18a-5p	up	miRNA	PAX5	down	mRNA
RP11-876N24.4	down	lncRNA	hsa-miR-18a-5p	up	miRNA	PAX5	down	mRNA
RP5-1171I10.5	down	lncRNA	hsa-miR-18a-5p	up	miRNA	PAX5	down	mRNA
TRG-AS1	down	lncRNA	hsa-miR-18a-5p	up	miRNA	PAX5	down	mRNA
AF131215.2	down	lncRNA	hsa-miR-18a-5p	up	miRNA	PIK3IP1	down	mRNA
GGTA1P	down	lncRNA	hsa-miR-18a-5p	up	miRNA	PIK3IP1	down	mRNA
GVINP1	down	lncRNA	hsa-miR-18a-5p	up	miRNA	PIK3IP1	down	mRNA
LINC00426	down	lncRNA	hsa-miR-18a-5p	up	miRNA	PIK3IP1	down	mRNA
LINC00892	down	lncRNA	hsa-miR-18a-5p	up	miRNA	PIK3IP1	down	mRNA
LINC00926	down	lncRNA	hsa-miR-18a-5p	up	miRNA	PIK3IP1	down	mRNA
LINC00996	down	lncRNA	hsa-miR-18a-5p	up	miRNA	PIK3IP1	down	mRNA
LINC01215	down	lncRNA	hsa-miR-18a-5p	up	miRNA	PIK3IP1	down	mRNA
LLNLR-470E3.1	down	lncRNA	hsa-miR-18a-5p	up	miRNA	PIK3IP1	down	mRNA
NCF1B	down	lncRNA	hsa-miR-18a-5p	up	miRNA	PIK3IP1	down	mRNA
NPM1P25	down	lncRNA	hsa-miR-18a-5p	up	miRNA	PIK3IP1	down	mRNA
PSMB8-AS1	down	lncRNA	hsa-miR-18a-5p	up	miRNA	PIK3IP1	down	mRNA
RP11-1334A24.6	down	lncRNA	hsa-miR-18a-5p	up	miRNA	PIK3IP1	down	mRNA
RP11-731F5.2	down	lncRNA	hsa-miR-18a-5p	up	miRNA	PIK3IP1	down	mRNA
RP11-876N24.4	down	lncRNA	hsa-miR-18a-5p	up	miRNA	PIK3IP1	down	mRNA
RP5-1171I10.5	down	lncRNA	hsa-miR-18a-5p	up	miRNA	PIK3IP1	down	mRNA
TRG-AS1	down	lncRNA	hsa-miR-18a-5p	up	miRNA	PIK3IP1	down	mRNA
AF131215.2	down	lncRNA	hsa-miR-18a-5p	up	miRNA	PLXNC1	down	mRNA
GGTA1P	down	lncRNA	hsa-miR-18a-5p	up	miRNA	PLXNC1	down	mRNA
GVINP1	down	lncRNA	hsa-miR-18a-5p	up	miRNA	PLXNC1	down	mRNA
LINC00426	down	lncRNA	hsa-miR-18a-5p	up	miRNA	PLXNC1	down	mRNA
LINC00892	down	lncRNA	hsa-miR-18a-5p	up	miRNA	PLXNC1	down	mRNA
LINC00926	down	lncRNA	hsa-miR-18a-5p	up	miRNA	PLXNC1	down	mRNA
LINC00996	down	lncRNA	hsa-miR-18a-5p	up	miRNA	PLXNC1	down	mRNA
LINC01215	down	lncRNA	hsa-miR-18a-5p	up	miRNA	PLXNC1	down	mRNA
LLNLR-470E3.1	down	lncRNA	hsa-miR-18a-5p	up	miRNA	PLXNC1	down	mRNA
NCF1B	down	lncRNA	hsa-miR-18a-5p	up	miRNA	PLXNC1	down	mRNA
NPM1P25	down	lncRNA	hsa-miR-18a-5p	up	miRNA	PLXNC1	down	mRNA
PSMB8-AS1	down	lncRNA	hsa-miR-18a-5p	up	miRNA	PLXNC1	down	mRNA
RP11-1334A24.6	down	lncRNA	hsa-miR-18a-5p	up	miRNA	PLXNC1	down	mRNA
RP11-731F5.2	down	lncRNA	hsa-miR-18a-5p	up	miRNA	PLXNC1	down	mRNA
RP11-876N24.4	down	lncRNA	hsa-miR-18a-5p	up	miRNA	PLXNC1	down	mRNA
RP5-1171I10.5	down	lncRNA	hsa-miR-18a-5p	up	miRNA	PLXNC1	down	mRNA
TRG-AS1	down	lncRNA	hsa-miR-18a-5p	up	miRNA	PLXNC1	down	mRNA
AF131215.2	down	lncRNA	hsa-miR-18a-5p	up	miRNA	TESPA1	down	mRNA
GGTA1P	down	lncRNA	hsa-miR-18a-5p	up	miRNA	TESPA1	down	mRNA
GVINP1	down	lncRNA	hsa-miR-18a-5p	up	miRNA	TESPA1	down	mRNA
LINC00426	down	lncRNA	hsa-miR-18a-5p	up	miRNA	TESPA1	down	mRNA
LINC00892	down	lncRNA	hsa-miR-18a-5p	up	miRNA	TESPA1	down	mRNA
LINC00926	down	lncRNA	hsa-miR-18a-5p	up	miRNA	TESPA1	down	mRNA
LINC00996	down	lncRNA	hsa-miR-18a-5p	up	miRNA	TESPA1	down	mRNA
LINC01215	down	lncRNA	hsa-miR-18a-5p	up	miRNA	TESPA1	down	mRNA
LLNLR-470E3.1	down	lncRNA	hsa-miR-18a-5p	up	miRNA	TESPA1	down	mRNA
NCF1B	down	lncRNA	hsa-miR-18a-5p	up	miRNA	TESPA1	down	mRNA
NPM1P25	down	lncRNA	hsa-miR-18a-5p	up	miRNA	TESPA1	down	mRNA
PSMB8-AS1	down	lncRNA	hsa-miR-18a-5p	up	miRNA	TESPA1	down	mRNA
RP11-1334A24.6	down	lncRNA	hsa-miR-18a-5p	up	miRNA	TESPA1	down	mRNA
RP11-731F5.2	down	lncRNA	hsa-miR-18a-5p	up	miRNA	TESPA1	down	mRNA
RP11-876N24.4	down	lncRNA	hsa-miR-18a-5p	up	miRNA	TESPA1	down	mRNA
RP5-1171I10.5	down	lncRNA	hsa-miR-18a-5p	up	miRNA	TESPA1	down	mRNA
TRG-AS1	down	lncRNA	hsa-miR-18a-5p	up	miRNA	TESPA1	down	mRNA
AF131215.2	down	lncRNA	hsa-miR-18a-5p	up	miRNA	WIPF1	down	mRNA
GGTA1P	down	lncRNA	hsa-miR-18a-5p	up	miRNA	WIPF1	down	mRNA
GVINP1	down	lncRNA	hsa-miR-18a-5p	up	miRNA	WIPF1	down	mRNA
LINC00426	down	lncRNA	hsa-miR-18a-5p	up	miRNA	WIPF1	down	mRNA
LINC00892	down	lncRNA	hsa-miR-18a-5p	up	miRNA	WIPF1	down	mRNA
LINC00926	down	lncRNA	hsa-miR-18a-5p	up	miRNA	WIPF1	down	mRNA
LINC00996	down	lncRNA	hsa-miR-18a-5p	up	miRNA	WIPF1	down	mRNA
LINC01215	down	lncRNA	hsa-miR-18a-5p	up	miRNA	WIPF1	down	mRNA
LLNLR-470E3.1	down	lncRNA	hsa-miR-18a-5p	up	miRNA	WIPF1	down	mRNA
NCF1B	down	lncRNA	hsa-miR-18a-5p	up	miRNA	WIPF1	down	mRNA
NPM1P25	down	lncRNA	hsa-miR-18a-5p	up	miRNA	WIPF1	down	mRNA
PSMB8-AS1	down	lncRNA	hsa-miR-18a-5p	up	miRNA	WIPF1	down	mRNA
RP11-1334A24.6	down	lncRNA	hsa-miR-18a-5p	up	miRNA	WIPF1	down	mRNA
RP11-731F5.2	down	lncRNA	hsa-miR-18a-5p	up	miRNA	WIPF1	down	mRNA
RP11-876N24.4	down	lncRNA	hsa-miR-18a-5p	up	miRNA	WIPF1	down	mRNA
RP5-1171I10.5	down	lncRNA	hsa-miR-18a-5p	up	miRNA	WIPF1	down	mRNA
TRG-AS1	down	lncRNA	hsa-miR-18a-5p	up	miRNA	WIPF1	down	mRNA
AF131215.2	down	lncRNA	hsa-miR-147b	up	miRNA	PAX5	down	mRNA
LINC00324	down	lncRNA	hsa-miR-147b	up	miRNA	PAX5	down	mRNA
LINC00926	down	lncRNA	hsa-miR-147b	up	miRNA	PAX5	down	mRNA
NAPSB	down	lncRNA	hsa-miR-147b	up	miRNA	PAX5	down	mRNA
NPM1P25	down	lncRNA	hsa-miR-147b	up	miRNA	PAX5	down	mRNA
RP11-731F5.2	down	lncRNA	hsa-miR-147b	up	miRNA	PAX5	down	mRNA
RP11-876N24.4	down	lncRNA	hsa-miR-147b	up	miRNA	PAX5	down	mRNA
TRG-AS1	down	lncRNA	hsa-miR-147b	up	miRNA	PAX5	down	mRNA
USP30-AS1	down	lncRNA	hsa-miR-147b	up	miRNA	PAX5	down	mRNA

## Sheet: ceRNA for Blue module
Regulatory relationship in ceRNA network for Blue module
lncRNA	lncRNA_style	lncRNA_Biotype	miRNA	miRNA_style	miRNA_Biotype	Gene Symbol	mRNA_style	mRNA_Biotype
AP000251.3	up	lncRNA	hsa-let-7c-5p	down	miRNA	CENPK	up	mRNA
CCDC150P1	up	lncRNA	hsa-let-7c-5p	down	miRNA	CENPK	up	mRNA
CTD-2510F5.4	up	lncRNA	hsa-let-7c-5p	down	miRNA	CENPK	up	mRNA
DDX12P	up	lncRNA	hsa-let-7c-5p	down	miRNA	CENPK	up	mRNA
RP11-259N19.1	up	lncRNA	hsa-let-7c-5p	down	miRNA	CENPK	up	mRNA
RP11-424C20.2	up	lncRNA	hsa-let-7c-5p	down	miRNA	CENPK	up	mRNA
RP11-564D11.3	up	lncRNA	hsa-let-7c-5p	down	miRNA	CENPK	up	mRNA
TMPO-AS1	up	lncRNA	hsa-let-7c-5p	down	miRNA	CENPK	up	mRNA
AP000251.3	up	lncRNA	hsa-let-7c-5p	down	miRNA	DARS2	up	mRNA
CCDC150P1	up	lncRNA	hsa-let-7c-5p	down	miRNA	DARS2	up	mRNA
CTD-2510F5.4	up	lncRNA	hsa-let-7c-5p	down	miRNA	DARS2	up	mRNA
DDX12P	up	lncRNA	hsa-let-7c-5p	down	miRNA	DARS2	up	mRNA
RP11-259N19.1	up	lncRNA	hsa-let-7c-5p	down	miRNA	DARS2	up	mRNA
RP11-424C20.2	up	lncRNA	hsa-let-7c-5p	down	miRNA	DARS2	up	mRNA
RP11-564D11.3	up	lncRNA	hsa-let-7c-5p	down	miRNA	DARS2	up	mRNA
TMPO-AS1	up	lncRNA	hsa-let-7c-5p	down	miRNA	DARS2	up	mRNA
AP000251.3	up	lncRNA	hsa-let-7c-5p	down	miRNA	ESPL1	up	mRNA
CCDC150P1	up	lncRNA	hsa-let-7c-5p	down	miRNA	ESPL1	up	mRNA
CTD-2510F5.4	up	lncRNA	hsa-let-7c-5p	down	miRNA	ESPL1	up	mRNA
DDX12P	up	lncRNA	hsa-let-7c-5p	down	miRNA	ESPL1	up	mRNA
RP11-259N19.1	up	lncRNA	hsa-let-7c-5p	down	miRNA	ESPL1	up	mRNA
RP11-424C20.2	up	lncRNA	hsa-let-7c-5p	down	miRNA	ESPL1	up	mRNA
RP11-564D11.3	up	lncRNA	hsa-let-7c-5p	down	miRNA	ESPL1	up	mRNA
TMPO-AS1	up	lncRNA	hsa-let-7c-5p	down	miRNA	ESPL1	up	mRNA
AP000251.3	up	lncRNA	hsa-let-7c-5p	down	miRNA	FBXO45	up	mRNA
CCDC150P1	up	lncRNA	hsa-let-7c-5p	down	miRNA	FBXO45	up	mRNA
CTD-2510F5.4	up	lncRNA	hsa-let-7c-5p	down	miRNA	FBXO45	up	mRNA
DDX12P	up	lncRNA	hsa-let-7c-5p	down	miRNA	FBXO45	up	mRNA
RP11-259N19.1	up	lncRNA	hsa-let-7c-5p	down	miRNA	FBXO45	up	mRNA
RP11-424C20.2	up	lncRNA	hsa-let-7c-5p	down	miRNA	FBXO45	up	mRNA
RP11-564D11.3	up	lncRNA	hsa-let-7c-5p	down	miRNA	FBXO45	up	mRNA
TMPO-AS1	up	lncRNA	hsa-let-7c-5p	down	miRNA	FBXO45	up	mRNA
AP000251.3	up	lncRNA	hsa-let-7c-5p	down	miRNA	HMGA1	up	mRNA
CCDC150P1	up	lncRNA	hsa-let-7c-5p	down	miRNA	HMGA1	up	mRNA
CTD-2510F5.4	up	lncRNA	hsa-let-7c-5p	down	miRNA	HMGA1	up	mRNA
DDX12P	up	lncRNA	hsa-let-7c-5p	down	miRNA	HMGA1	up	mRNA
RP11-259N19.1	up	lncRNA	hsa-let-7c-5p	down	miRNA	HMGA1	up	mRNA
RP11-424C20.2	up	lncRNA	hsa-let-7c-5p	down	miRNA	HMGA1	up	mRNA
RP11-564D11.3	up	lncRNA	hsa-let-7c-5p	down	miRNA	HMGA1	up	mRNA
TMPO-AS1	up	lncRNA	hsa-let-7c-5p	down	miRNA	HMGA1	up	mRNA
AP000251.3	up	lncRNA	hsa-let-7c-5p	down	miRNA	IGF2BP3	up	mRNA
CCDC150P1	up	lncRNA	hsa-let-7c-5p	down	miRNA	IGF2BP3	up	mRNA
CTD-2510F5.4	up	lncRNA	hsa-let-7c-5p	down	miRNA	IGF2BP3	up	mRNA
DDX12P	up	lncRNA	hsa-let-7c-5p	down	miRNA	IGF2BP3	up	mRNA
RP11-259N19.1	up	lncRNA	hsa-let-7c-5p	down	miRNA	IGF2BP3	up	mRNA
RP11-424C20.2	up	lncRNA	hsa-let-7c-5p	down	miRNA	IGF2BP3	up	mRNA
RP11-564D11.3	up	lncRNA	hsa-let-7c-5p	down	miRNA	IGF2BP3	up	mRNA
TMPO-AS1	up	lncRNA	hsa-let-7c-5p	down	miRNA	IGF2BP3	up	mRNA
AP000251.3	up	lncRNA	hsa-let-7c-5p	down	miRNA	POLQ	up	mRNA
CCDC150P1	up	lncRNA	hsa-let-7c-5p	down	miRNA	POLQ	up	mRNA
CTD-2510F5.4	up	lncRNA	hsa-let-7c-5p	down	miRNA	POLQ	up	mRNA
DDX12P	up	lncRNA	hsa-let-7c-5p	down	miRNA	POLQ	up	mRNA
RP11-259N19.1	up	lncRNA	hsa-let-7c-5p	down	miRNA	POLQ	up	mRNA
RP11-424C20.2	up	lncRNA	hsa-let-7c-5p	down	miRNA	POLQ	up	mRNA
RP11-564D11.3	up	lncRNA	hsa-let-7c-5p	down	miRNA	POLQ	up	mRNA
TMPO-AS1	up	lncRNA	hsa-let-7c-5p	down	miRNA	POLQ	up	mRNA
AP000251.3	up	lncRNA	hsa-let-7c-5p	down	miRNA	TK1	up	mRNA
CCDC150P1	up	lncRNA	hsa-let-7c-5p	down	miRNA	TK1	up	mRNA
CTD-2510F5.4	up	lncRNA	hsa-let-7c-5p	down	miRNA	TK1	up	mRNA
DDX12P	up	lncRNA	hsa-let-7c-5p	down	miRNA	TK1	up	mRNA
RP11-259N19.1	up	lncRNA	hsa-let-7c-5p	down	miRNA	TK1	up	mRNA
RP11-424C20.2	up	lncRNA	hsa-let-7c-5p	down	miRNA	TK1	up	mRNA
RP11-564D11.3	up	lncRNA	hsa-let-7c-5p	down	miRNA	TK1	up	mRNA
TMPO-AS1	up	lncRNA	hsa-let-7c-5p	down	miRNA	TK1	up	mRNA
AP000251.3	up	lncRNA	hsa-let-7c-5p	down	miRNA	TMPO	up	mRNA
CCDC150P1	up	lncRNA	hsa-let-7c-5p	down	miRNA	TMPO	up	mRNA
CTD-2510F5.4	up	lncRNA	hsa-let-7c-5p	down	miRNA	TMPO	up	mRNA
DDX12P	up	lncRNA	hsa-let-7c-5p	down	miRNA	TMPO	up	mRNA
RP11-259N19.1	up	lncRNA	hsa-let-7c-5p	down	miRNA	TMPO	up	mRNA
RP11-424C20.2	up	lncRNA	hsa-let-7c-5p	down	miRNA	TMPO	up	mRNA
RP11-564D11.3	up	lncRNA	hsa-let-7c-5p	down	miRNA	TMPO	up	mRNA
TMPO-AS1	up	lncRNA	hsa-let-7c-5p	down	miRNA	TMPO	up	mRNA
AP000251.3	up	lncRNA	hsa-miR-1247-3p	down	miRNA	HJURP	up	mRNA
CTD-2510F5.4	up	lncRNA	hsa-miR-1247-3p	down	miRNA	HJURP	up	mRNA
DDX12P	up	lncRNA	hsa-miR-1247-3p	down	miRNA	HJURP	up	mRNA
RP11-259N19.1	up	lncRNA	hsa-miR-1247-3p	down	miRNA	HJURP	up	mRNA
RP11-424C20.2	up	lncRNA	hsa-miR-1247-3p	down	miRNA	HJURP	up	mRNA
RP11-443B20.1	up	lncRNA	hsa-miR-1247-3p	down	miRNA	HJURP	up	mRNA
RP11-564D11.3	up	lncRNA	hsa-miR-1247-3p	down	miRNA	HJURP	up	mRNA
TMPO-AS1	up	lncRNA	hsa-miR-1247-3p	down	miRNA	HJURP	up	mRNA
TYMSOS	up	lncRNA	hsa-miR-1247-3p	down	miRNA	HJURP	up	mRNA
AP000251.3	up	lncRNA	hsa-miR-1247-3p	down	miRNA	SAPCD2	up	mRNA
CTD-2510F5.4	up	lncRNA	hsa-miR-1247-3p	down	miRNA	SAPCD2	up	mRNA
DDX12P	up	lncRNA	hsa-miR-1247-3p	down	miRNA	SAPCD2	up	mRNA
RP11-259N19.1	up	lncRNA	hsa-miR-1247-3p	down	miRNA	SAPCD2	up	mRNA
RP11-424C20.2	up	lncRNA	hsa-miR-1247-3p	down	miRNA	SAPCD2	up	mRNA
RP11-443B20.1	up	lncRNA	hsa-miR-1247-3p	down	miRNA	SAPCD2	up	mRNA
RP11-564D11.3	up	lncRNA	hsa-miR-1247-3p	down	miRNA	SAPCD2	up	mRNA
TMPO-AS1	up	lncRNA	hsa-miR-1247-3p	down	miRNA	SAPCD2	up	mRNA
TYMSOS	up	lncRNA	hsa-miR-1247-3p	down	miRNA	SAPCD2	up	mRNA
AP000251.3	up	lncRNA	hsa-miR-1247-3p	down	miRNA	SPC24	up	mRNA
CTD-2510F5.4	up	lncRNA	hsa-miR-1247-3p	down	miRNA	SPC24	up	mRNA
DDX12P	up	lncRNA	hsa-miR-1247-3p	down	miRNA	SPC24	up	mRNA
RP11-259N19.1	up	lncRNA	hsa-miR-1247-3p	down	miRNA	SPC24	up	mRNA
RP11-424C20.2	up	lncRNA	hsa-miR-1247-3p	down	miRNA	SPC24	up	mRNA
RP11-443B20.1	up	lncRNA	hsa-miR-1247-3p	down	miRNA	SPC24	up	mRNA
RP11-564D11.3	up	lncRNA	hsa-miR-1247-3p	down	miRNA	SPC24	up	mRNA
TMPO-AS1	up	lncRNA	hsa-miR-1247-3p	down	miRNA	SPC24	up	mRNA
TYMSOS	up	lncRNA	hsa-miR-1247-3p	down	miRNA	SPC24	up	mRNA
AP000251.3	up	lncRNA	hsa-miR-1247-3p	down	miRNA	TXNRD1	up	mRNA
CTD-2510F5.4	up	lncRNA	hsa-miR-1247-3p	down	miRNA	TXNRD1	up	mRNA
DDX12P	up	lncRNA	hsa-miR-1247-3p	down	miRNA	TXNRD1	up	mRNA
RP11-259N19.1	up	lncRNA	hsa-miR-1247-3p	down	miRNA	TXNRD1	up	mRNA
RP11-424C20.2	up	lncRNA	hsa-miR-1247-3p	down	miRNA	TXNRD1	up	mRNA
RP11-443B20.1	up	lncRNA	hsa-miR-1247-3p	down	miRNA	TXNRD1	up	mRNA
RP11-564D11.3	up	lncRNA	hsa-miR-1247-3p	down	miRNA	TXNRD1	up	mRNA
TMPO-AS1	up	lncRNA	hsa-miR-1247-3p	down	miRNA	TXNRD1	up	mRNA
TYMSOS	up	lncRNA	hsa-miR-1247-3p	down	miRNA	TXNRD1	up	mRNA
CCDC150P1	up	lncRNA	hsa-miR-133a-3p	down	miRNA	ARHGEF39	up	mRNA
DDX12P	up	lncRNA	hsa-miR-133a-3p	down	miRNA	ARHGEF39	up	mRNA
RP11-303E16.2	up	lncRNA	hsa-miR-133a-3p	down	miRNA	ARHGEF39	up	mRNA
RP11-424C20.2	up	lncRNA	hsa-miR-133a-3p	down	miRNA	ARHGEF39	up	mRNA
TMPO-AS1	up	lncRNA	hsa-miR-133a-3p	down	miRNA	ARHGEF39	up	mRNA
TYMSOS	up	lncRNA	hsa-miR-133a-3p	down	miRNA	ARHGEF39	up	mRNA
CCDC150P1	up	lncRNA	hsa-miR-133a-3p	down	miRNA	LMNB2	up	mRNA
DDX12P	up	lncRNA	hsa-miR-133a-3p	down	miRNA	LMNB2	up	mRNA
RP11-303E16.2	up	lncRNA	hsa-miR-133a-3p	down	miRNA	LMNB2	up	mRNA
RP11-424C20.2	up	lncRNA	hsa-miR-133a-3p	down	miRNA	LMNB2	up	mRNA
TMPO-AS1	up	lncRNA	hsa-miR-133a-3p	down	miRNA	LMNB2	up	mRNA
TYMSOS	up	lncRNA	hsa-miR-133a-3p	down	miRNA	LMNB2	up	mRNA
CCDC150P1	up	lncRNA	hsa-miR-133a-3p	down	miRNA	SUV39H1	up	mRNA
DDX12P	up	lncRNA	hsa-miR-133a-3p	down	miRNA	SUV39H1	up	mRNA
RP11-303E16.2	up	lncRNA	hsa-miR-133a-3p	down	miRNA	SUV39H1	up	mRNA
RP11-424C20.2	up	lncRNA	hsa-miR-133a-3p	down	miRNA	SUV39H1	up	mRNA
TMPO-AS1	up	lncRNA	hsa-miR-133a-3p	down	miRNA	SUV39H1	up	mRNA
TYMSOS	up	lncRNA	hsa-miR-133a-3p	down	miRNA	SUV39H1	up	mRNA
AP000251.3	up	lncRNA	hsa-miR-146a-5p	down	miRNA	B3GNT5	up	mRNA
DDX12P	up	lncRNA	hsa-miR-146a-5p	down	miRNA	B3GNT5	up	mRNA
TMPO-AS1	up	lncRNA	hsa-miR-146a-5p	down	miRNA	B3GNT5	up	mRNA
AP000251.3	up	lncRNA	hsa-miR-146a-5p	down	miRNA	BRCA1	up	mRNA
DDX12P	up	lncRNA	hsa-miR-146a-5p	down	miRNA	BRCA1	up	mRNA
TMPO-AS1	up	lncRNA	hsa-miR-146a-5p	down	miRNA	BRCA1	up	mRNA
AP000251.3	up	lncRNA	hsa-miR-146a-5p	down	miRNA	CDC6	up	mRNA
DDX12P	up	lncRNA	hsa-miR-146a-5p	down	miRNA	CDC6	up	mRNA
TMPO-AS1	up	lncRNA	hsa-miR-146a-5p	down	miRNA	CDC6	up	mRNA
AP000251.3	up	lncRNA	hsa-miR-146a-5p	down	miRNA	TIMELESS	up	mRNA
DDX12P	up	lncRNA	hsa-miR-146a-5p	down	miRNA	TIMELESS	up	mRNA
TMPO-AS1	up	lncRNA	hsa-miR-146a-5p	down	miRNA	TIMELESS	up	mRNA
RP11-424C20.2	up	lncRNA	hsa-miR-148a-5p	down	miRNA	CENPF	up	mRNA
RP11-424C20.2	up	lncRNA	hsa-miR-148a-5p	down	miRNA	FAM136A	up	mRNA
AP000251.3	up	lncRNA	hsa-miR-150-5p	down	miRNA	WDR76	up	mRNA
DDX12P	up	lncRNA	hsa-miR-150-5p	down	miRNA	WDR76	up	mRNA
RP11-259N19.1	up	lncRNA	hsa-miR-150-5p	down	miRNA	WDR76	up	mRNA
AP000251.3	up	lncRNA	hsa-miR-150-5p	down	miRNA	TUBB	up	mRNA
DDX12P	up	lncRNA	hsa-miR-150-5p	down	miRNA	TUBB	up	mRNA
RP11-259N19.1	up	lncRNA	hsa-miR-150-5p	down	miRNA	TUBB	up	mRNA
AP000251.3	up	lncRNA	hsa-miR-150-5p	down	miRNA	SUV39H1	up	mRNA
DDX12P	up	lncRNA	hsa-miR-150-5p	down	miRNA	SUV39H1	up	mRNA
RP11-259N19.1	up	lncRNA	hsa-miR-150-5p	down	miRNA	SUV39H1	up	mRNA
AP000251.3	up	lncRNA	hsa-miR-150-5p	down	miRNA	SLC2A1	up	mRNA
DDX12P	up	lncRNA	hsa-miR-150-5p	down	miRNA	SLC2A1	up	mRNA
RP11-259N19.1	up	lncRNA	hsa-miR-150-5p	down	miRNA	SLC2A1	up	mRNA
AP000251.3	up	lncRNA	hsa-miR-150-5p	down	miRNA	RACGAP1	up	mRNA
DDX12P	up	lncRNA	hsa-miR-150-5p	down	miRNA	RACGAP1	up	mRNA
RP11-259N19.1	up	lncRNA	hsa-miR-150-5p	down	miRNA	RACGAP1	up	mRNA
AP000251.3	up	lncRNA	hsa-miR-150-5p	down	miRNA	PSMD11	up	mRNA
DDX12P	up	lncRNA	hsa-miR-150-5p	down	miRNA	PSMD11	up	mRNA
RP11-259N19.1	up	lncRNA	hsa-miR-150-5p	down	miRNA	PSMD11	up	mRNA
AP000251.3	up	lncRNA	hsa-miR-150-5p	down	miRNA	PRR11	up	mRNA
DDX12P	up	lncRNA	hsa-miR-150-5p	down	miRNA	PRR11	up	mRNA
RP11-259N19.1	up	lncRNA	hsa-miR-150-5p	down	miRNA	PRR11	up	mRNA
AP000251.3	up	lncRNA	hsa-miR-150-5p	down	miRNA	NDC1	up	mRNA
DDX12P	up	lncRNA	hsa-miR-150-5p	down	miRNA	NDC1	up	mRNA
RP11-259N19.1	up	lncRNA	hsa-miR-150-5p	down	miRNA	NDC1	up	mRNA
AP000251.3	up	lncRNA	hsa-miR-150-5p	down	miRNA	NCAPG	up	mRNA
DDX12P	up	lncRNA	hsa-miR-150-5p	down	miRNA	NCAPG	up	mRNA
RP11-259N19.1	up	lncRNA	hsa-miR-150-5p	down	miRNA	NCAPG	up	mRNA
AP000251.3	up	lncRNA	hsa-miR-150-5p	down	miRNA	MIS18A	up	mRNA
DDX12P	up	lncRNA	hsa-miR-150-5p	down	miRNA	MIS18A	up	mRNA
RP11-259N19.1	up	lncRNA	hsa-miR-150-5p	down	miRNA	MIS18A	up	mRNA
AP000251.3	up	lncRNA	hsa-miR-150-5p	down	miRNA	MCM10	up	mRNA
DDX12P	up	lncRNA	hsa-miR-150-5p	down	miRNA	MCM10	up	mRNA
RP11-259N19.1	up	lncRNA	hsa-miR-150-5p	down	miRNA	MCM10	up	mRNA
AP000251.3	up	lncRNA	hsa-miR-150-5p	down	miRNA	INCENP	up	mRNA
DDX12P	up	lncRNA	hsa-miR-150-5p	down	miRNA	INCENP	up	mRNA
RP11-259N19.1	up	lncRNA	hsa-miR-150-5p	down	miRNA	INCENP	up	mRNA
AP000251.3	up	lncRNA	hsa-miR-150-5p	down	miRNA	HDGF	up	mRNA
DDX12P	up	lncRNA	hsa-miR-150-5p	down	miRNA	HDGF	up	mRNA
RP11-259N19.1	up	lncRNA	hsa-miR-150-5p	down	miRNA	HDGF	up	mRNA
AP000251.3	up	lncRNA	hsa-miR-150-5p	down	miRNA	CCNA2	up	mRNA
DDX12P	up	lncRNA	hsa-miR-150-5p	down	miRNA	CCNA2	up	mRNA
RP11-259N19.1	up	lncRNA	hsa-miR-150-5p	down	miRNA	CCNA2	up	mRNA
AP000251.3	up	lncRNA	hsa-miR-150-5p	down	miRNA	BORA	up	mRNA
DDX12P	up	lncRNA	hsa-miR-150-5p	down	miRNA	BORA	up	mRNA
RP11-259N19.1	up	lncRNA	hsa-miR-150-5p	down	miRNA	BORA	up	mRNA
AP000251.3	up	lncRNA	hsa-miR-184	down	miRNA	CDC25A	up	mRNA
TMPO-AS1	up	lncRNA	hsa-miR-184	down	miRNA	CDC25A	up	mRNA
AP000251.3	up	lncRNA	hsa-miR-184	down	miRNA	DDX11	up	mRNA
TMPO-AS1	up	lncRNA	hsa-miR-184	down	miRNA	DDX11	up	mRNA
DDX12P	up	lncRNA	hsa-miR-195-5p	down	miRNA	ARHGEF39	up	mRNA
RP11-259N19.1	up	lncRNA	hsa-miR-195-5p	down	miRNA	ARHGEF39	up	mRNA
RP11-443B20.1	up	lncRNA	hsa-miR-195-5p	down	miRNA	ARHGEF39	up	mRNA
DDX12P	up	lncRNA	hsa-miR-195-5p	down	miRNA	CENPA	up	mRNA
RP11-259N19.1	up	lncRNA	hsa-miR-195-5p	down	miRNA	CENPA	up	mRNA
RP11-443B20.1	up	lncRNA	hsa-miR-195-5p	down	miRNA	CENPA	up	mRNA
DDX12P	up	lncRNA	hsa-miR-195-5p	down	miRNA	CHEK1	up	mRNA
RP11-259N19.1	up	lncRNA	hsa-miR-195-5p	down	miRNA	CHEK1	up	mRNA
RP11-443B20.1	up	lncRNA	hsa-miR-195-5p	down	miRNA	CHEK1	up	mRNA
DDX12P	up	lncRNA	hsa-miR-195-5p	down	miRNA	DENR	up	mRNA
RP11-259N19.1	up	lncRNA	hsa-miR-195-5p	down	miRNA	DENR	up	mRNA
RP11-443B20.1	up	lncRNA	hsa-miR-195-5p	down	miRNA	DENR	up	mRNA
DDX12P	up	lncRNA	hsa-miR-195-5p	down	miRNA	GINS4	up	mRNA
RP11-259N19.1	up	lncRNA	hsa-miR-195-5p	down	miRNA	GINS4	up	mRNA
RP11-443B20.1	up	lncRNA	hsa-miR-195-5p	down	miRNA	GINS4	up	mRNA
DDX12P	up	lncRNA	hsa-miR-195-5p	down	miRNA	KIF18B	up	mRNA
RP11-259N19.1	up	lncRNA	hsa-miR-195-5p	down	miRNA	KIF18B	up	mRNA
RP11-443B20.1	up	lncRNA	hsa-miR-195-5p	down	miRNA	KIF18B	up	mRNA
DDX12P	up	lncRNA	hsa-miR-195-5p	down	miRNA	SLC7A1	up	mRNA
RP11-259N19.1	up	lncRNA	hsa-miR-195-5p	down	miRNA	SLC7A1	up	mRNA
RP11-443B20.1	up	lncRNA	hsa-miR-195-5p	down	miRNA	SLC7A1	up	mRNA
DDX12P	up	lncRNA	hsa-miR-195-5p	down	miRNA	SRPK1	up	mRNA
RP11-259N19.1	up	lncRNA	hsa-miR-195-5p	down	miRNA	SRPK1	up	mRNA
RP11-443B20.1	up	lncRNA	hsa-miR-195-5p	down	miRNA	SRPK1	up	mRNA
CCDC150P1	up	lncRNA	hsa-miR-217	down	miRNA	MCM8	up	mRNA
DDX12P	up	lncRNA	hsa-miR-217	down	miRNA	MCM8	up	mRNA
RP11-424C20.2	up	lncRNA	hsa-miR-217	down	miRNA	MCM8	up	mRNA
CCDC150P1	up	lncRNA	hsa-miR-217	down	miRNA	POLQ	up	mRNA
DDX12P	up	lncRNA	hsa-miR-217	down	miRNA	POLQ	up	mRNA
RP11-424C20.2	up	lncRNA	hsa-miR-217	down	miRNA	POLQ	up	mRNA
CCDC150P1	up	lncRNA	hsa-miR-217	down	miRNA	PSMD11	up	mRNA
DDX12P	up	lncRNA	hsa-miR-217	down	miRNA	PSMD11	up	mRNA
RP11-424C20.2	up	lncRNA	hsa-miR-217	down	miRNA	PSMD11	up	mRNA
CCDC150P1	up	lncRNA	hsa-miR-217	down	miRNA	SKA3	up	mRNA
DDX12P	up	lncRNA	hsa-miR-217	down	miRNA	SKA3	up	mRNA
RP11-424C20.2	up	lncRNA	hsa-miR-217	down	miRNA	SKA3	up	mRNA
AP000251.3	up	lncRNA	hsa-miR-29b-2-5p	down	miRNA	BRCA1	up	mRNA
CCDC150P1	up	lncRNA	hsa-miR-29b-2-5p	down	miRNA	BRCA1	up	mRNA
RP11-564D11.3	up	lncRNA	hsa-miR-29b-2-5p	down	miRNA	BRCA1	up	mRNA
TMPO-AS1	up	lncRNA	hsa-miR-29b-2-5p	down	miRNA	BRCA1	up	mRNA
TYMSOS	up	lncRNA	hsa-miR-29b-2-5p	down	miRNA	BRCA1	up	mRNA
AP000251.3	up	lncRNA	hsa-miR-29b-2-5p	down	miRNA	FAAP24	up	mRNA
CCDC150P1	up	lncRNA	hsa-miR-29b-2-5p	down	miRNA	FAAP24	up	mRNA
RP11-564D11.3	up	lncRNA	hsa-miR-29b-2-5p	down	miRNA	FAAP24	up	mRNA
TMPO-AS1	up	lncRNA	hsa-miR-29b-2-5p	down	miRNA	FAAP24	up	mRNA
TYMSOS	up	lncRNA	hsa-miR-29b-2-5p	down	miRNA	FAAP24	up	mRNA
AP000251.3	up	lncRNA	hsa-miR-29b-2-5p	down	miRNA	FANCD2	up	mRNA
CCDC150P1	up	lncRNA	hsa-miR-29b-2-5p	down	miRNA	FANCD2	up	mRNA
RP11-564D11.3	up	lncRNA	hsa-miR-29b-2-5p	down	miRNA	FANCD2	up	mRNA
TMPO-AS1	up	lncRNA	hsa-miR-29b-2-5p	down	miRNA	FANCD2	up	mRNA
TYMSOS	up	lncRNA	hsa-miR-29b-2-5p	down	miRNA	FANCD2	up	mRNA
AP000251.3	up	lncRNA	hsa-miR-29b-2-5p	down	miRNA	GINS4	up	mRNA
CCDC150P1	up	lncRNA	hsa-miR-29b-2-5p	down	miRNA	GINS4	up	mRNA
RP11-564D11.3	up	lncRNA	hsa-miR-29b-2-5p	down	miRNA	GINS4	up	mRNA
TMPO-AS1	up	lncRNA	hsa-miR-29b-2-5p	down	miRNA	GINS4	up	mRNA
TYMSOS	up	lncRNA	hsa-miR-29b-2-5p	down	miRNA	GINS4	up	mRNA
AP000251.3	up	lncRNA	hsa-miR-29b-2-5p	down	miRNA	LMNB2	up	mRNA
CCDC150P1	up	lncRNA	hsa-miR-29b-2-5p	down	miRNA	LMNB2	up	mRNA
RP11-564D11.3	up	lncRNA	hsa-miR-29b-2-5p	down	miRNA	LMNB2	up	mRNA
TMPO-AS1	up	lncRNA	hsa-miR-29b-2-5p	down	miRNA	LMNB2	up	mRNA
TYMSOS	up	lncRNA	hsa-miR-29b-2-5p	down	miRNA	LMNB2	up	mRNA
AP000251.3	up	lncRNA	hsa-miR-29b-2-5p	down	miRNA	MCM8	up	mRNA
CCDC150P1	up	lncRNA	hsa-miR-29b-2-5p	down	miRNA	MCM8	up	mRNA
RP11-564D11.3	up	lncRNA	hsa-miR-29b-2-5p	down	miRNA	MCM8	up	mRNA
TMPO-AS1	up	lncRNA	hsa-miR-29b-2-5p	down	miRNA	MCM8	up	mRNA
TYMSOS	up	lncRNA	hsa-miR-29b-2-5p	down	miRNA	MCM8	up	mRNA
AP000251.3	up	lncRNA	hsa-miR-29b-2-5p	down	miRNA	NDC1	up	mRNA
CCDC150P1	up	lncRNA	hsa-miR-29b-2-5p	down	miRNA	NDC1	up	mRNA
RP11-564D11.3	up	lncRNA	hsa-miR-29b-2-5p	down	miRNA	NDC1	up	mRNA
TMPO-AS1	up	lncRNA	hsa-miR-29b-2-5p	down	miRNA	NDC1	up	mRNA
TYMSOS	up	lncRNA	hsa-miR-29b-2-5p	down	miRNA	NDC1	up	mRNA
AP000251.3	up	lncRNA	hsa-miR-29b-2-5p	down	miRNA	PGAM5	up	mRNA
CCDC150P1	up	lncRNA	hsa-miR-29b-2-5p	down	miRNA	PGAM5	up	mRNA
RP11-564D11.3	up	lncRNA	hsa-miR-29b-2-5p	down	miRNA	PGAM5	up	mRNA
TMPO-AS1	up	lncRNA	hsa-miR-29b-2-5p	down	miRNA	PGAM5	up	mRNA
TYMSOS	up	lncRNA	hsa-miR-29b-2-5p	down	miRNA	PGAM5	up	mRNA
AP000251.3	up	lncRNA	hsa-miR-29b-2-5p	down	miRNA	PRR11	up	mRNA
CCDC150P1	up	lncRNA	hsa-miR-29b-2-5p	down	miRNA	PRR11	up	mRNA
RP11-564D11.3	up	lncRNA	hsa-miR-29b-2-5p	down	miRNA	PRR11	up	mRNA
TMPO-AS1	up	lncRNA	hsa-miR-29b-2-5p	down	miRNA	PRR11	up	mRNA
TYMSOS	up	lncRNA	hsa-miR-29b-2-5p	down	miRNA	PRR11	up	mRNA
AP000251.3	up	lncRNA	hsa-miR-29b-2-5p	down	miRNA	RAD51	up	mRNA
CCDC150P1	up	lncRNA	hsa-miR-29b-2-5p	down	miRNA	RAD51	up	mRNA
RP11-564D11.3	up	lncRNA	hsa-miR-29b-2-5p	down	miRNA	RAD51	up	mRNA
TMPO-AS1	up	lncRNA	hsa-miR-29b-2-5p	down	miRNA	RAD51	up	mRNA
TYMSOS	up	lncRNA	hsa-miR-29b-2-5p	down	miRNA	RAD51	up	mRNA
AP000251.3	up	lncRNA	hsa-miR-29b-2-5p	down	miRNA	SLC7A1	up	mRNA
CCDC150P1	up	lncRNA	hsa-miR-29b-2-5p	down	miRNA	SLC7A1	up	mRNA
RP11-564D11.3	up	lncRNA	hsa-miR-29b-2-5p	down	miRNA	SLC7A1	up	mRNA
TMPO-AS1	up	lncRNA	hsa-miR-29b-2-5p	down	miRNA	SLC7A1	up	mRNA
TYMSOS	up	lncRNA	hsa-miR-29b-2-5p	down	miRNA	SLC7A1	up	mRNA
AP000251.3	up	lncRNA	hsa-miR-29b-2-5p	down	miRNA	SMPD4	up	mRNA
CCDC150P1	up	lncRNA	hsa-miR-29b-2-5p	down	miRNA	SMPD4	up	mRNA
RP11-564D11.3	up	lncRNA	hsa-miR-29b-2-5p	down	miRNA	SMPD4	up	mRNA
TMPO-AS1	up	lncRNA	hsa-miR-29b-2-5p	down	miRNA	SMPD4	up	mRNA
TYMSOS	up	lncRNA	hsa-miR-29b-2-5p	down	miRNA	SMPD4	up	mRNA
AP000251.3	up	lncRNA	hsa-miR-29b-2-5p	down	miRNA	TCF19	up	mRNA
CCDC150P1	up	lncRNA	hsa-miR-29b-2-5p	down	miRNA	TCF19	up	mRNA
RP11-564D11.3	up	lncRNA	hsa-miR-29b-2-5p	down	miRNA	TCF19	up	mRNA
TMPO-AS1	up	lncRNA	hsa-miR-29b-2-5p	down	miRNA	TCF19	up	mRNA
TYMSOS	up	lncRNA	hsa-miR-29b-2-5p	down	miRNA	TCF19	up	mRNA
AP000251.3	up	lncRNA	hsa-miR-29b-2-5p	down	miRNA	XPO5	up	mRNA
CCDC150P1	up	lncRNA	hsa-miR-29b-2-5p	down	miRNA	XPO5	up	mRNA
RP11-564D11.3	up	lncRNA	hsa-miR-29b-2-5p	down	miRNA	XPO5	up	mRNA
TMPO-AS1	up	lncRNA	hsa-miR-29b-2-5p	down	miRNA	XPO5	up	mRNA
TYMSOS	up	lncRNA	hsa-miR-29b-2-5p	down	miRNA	XPO5	up	mRNA
CCDC150P1	up	lncRNA	hsa-miR-29c-3p	down	miRNA	AUNIP	up	mRNA
DDX12P	up	lncRNA	hsa-miR-29c-3p	down	miRNA	AUNIP	up	mRNA
RP11-443B20.1	up	lncRNA	hsa-miR-29c-3p	down	miRNA	AUNIP	up	mRNA
RP11-564D11.3	up	lncRNA	hsa-miR-29c-3p	down	miRNA	AUNIP	up	mRNA
TMPO-AS1	up	lncRNA	hsa-miR-29c-3p	down	miRNA	AUNIP	up	mRNA
CCDC150P1	up	lncRNA	hsa-miR-29c-3p	down	miRNA	CCNA2	up	mRNA
DDX12P	up	lncRNA	hsa-miR-29c-3p	down	miRNA	CCNA2	up	mRNA
RP11-443B20.1	up	lncRNA	hsa-miR-29c-3p	down	miRNA	CCNA2	up	mRNA
RP11-564D11.3	up	lncRNA	hsa-miR-29c-3p	down	miRNA	CCNA2	up	mRNA
TMPO-AS1	up	lncRNA	hsa-miR-29c-3p	down	miRNA	CCNA2	up	mRNA
CCDC150P1	up	lncRNA	hsa-miR-29c-3p	down	miRNA	FAM136A	up	mRNA
DDX12P	up	lncRNA	hsa-miR-29c-3p	down	miRNA	FAM136A	up	mRNA
RP11-443B20.1	up	lncRNA	hsa-miR-29c-3p	down	miRNA	FAM136A	up	mRNA
RP11-564D11.3	up	lncRNA	hsa-miR-29c-3p	down	miRNA	FAM136A	up	mRNA
TMPO-AS1	up	lncRNA	hsa-miR-29c-3p	down	miRNA	FAM136A	up	mRNA
CCDC150P1	up	lncRNA	hsa-miR-29c-3p	down	miRNA	H2AFX	up	mRNA
DDX12P	up	lncRNA	hsa-miR-29c-3p	down	miRNA	H2AFX	up	mRNA
RP11-443B20.1	up	lncRNA	hsa-miR-29c-3p	down	miRNA	H2AFX	up	mRNA
RP11-564D11.3	up	lncRNA	hsa-miR-29c-3p	down	miRNA	H2AFX	up	mRNA
TMPO-AS1	up	lncRNA	hsa-miR-29c-3p	down	miRNA	H2AFX	up	mRNA
CCDC150P1	up	lncRNA	hsa-miR-29c-3p	down	miRNA	KPNB1	up	mRNA
DDX12P	up	lncRNA	hsa-miR-29c-3p	down	miRNA	KPNB1	up	mRNA
RP11-443B20.1	up	lncRNA	hsa-miR-29c-3p	down	miRNA	KPNB1	up	mRNA
RP11-564D11.3	up	lncRNA	hsa-miR-29c-3p	down	miRNA	KPNB1	up	mRNA
TMPO-AS1	up	lncRNA	hsa-miR-29c-3p	down	miRNA	KPNB1	up	mRNA
CCDC150P1	up	lncRNA	hsa-miR-30a-3p	down	miRNA	EME1	up	mRNA
DDX12P	up	lncRNA	hsa-miR-30a-3p	down	miRNA	EME1	up	mRNA
RP11-259N19.1	up	lncRNA	hsa-miR-30a-3p	down	miRNA	EME1	up	mRNA
RP11-443B20.1	up	lncRNA	hsa-miR-30a-3p	down	miRNA	EME1	up	mRNA
RP11-564D11.3	up	lncRNA	hsa-miR-30a-3p	down	miRNA	EME1	up	mRNA
TMPO-AS1	up	lncRNA	hsa-miR-30a-3p	down	miRNA	EME1	up	mRNA
CCDC150P1	up	lncRNA	hsa-miR-30a-3p	down	miRNA	STIL	up	mRNA
DDX12P	up	lncRNA	hsa-miR-30a-3p	down	miRNA	STIL	up	mRNA
RP11-259N19.1	up	lncRNA	hsa-miR-30a-3p	down	miRNA	STIL	up	mRNA
RP11-443B20.1	up	lncRNA	hsa-miR-30a-3p	down	miRNA	STIL	up	mRNA
RP11-564D11.3	up	lncRNA	hsa-miR-30a-3p	down	miRNA	STIL	up	mRNA
TMPO-AS1	up	lncRNA	hsa-miR-30a-3p	down	miRNA	STIL	up	mRNA
AP000251.3	up	lncRNA	hsa-miR-30c-2-3p	down	miRNA	CCNF	up	mRNA
CCDC150P1	up	lncRNA	hsa-miR-30c-2-3p	down	miRNA	CCNF	up	mRNA
DDX12P	up	lncRNA	hsa-miR-30c-2-3p	down	miRNA	CCNF	up	mRNA
RP11-303E16.2	up	lncRNA	hsa-miR-30c-2-3p	down	miRNA	CCNF	up	mRNA
RP11-424C20.2	up	lncRNA	hsa-miR-30c-2-3p	down	miRNA	CCNF	up	mRNA
RP11-564D11.3	up	lncRNA	hsa-miR-30c-2-3p	down	miRNA	CCNF	up	mRNA
TMPO-AS1	up	lncRNA	hsa-miR-30c-2-3p	down	miRNA	CCNF	up	mRNA
AP000251.3	up	lncRNA	hsa-miR-30c-2-3p	down	miRNA	CDC25A	up	mRNA
CCDC150P1	up	lncRNA	hsa-miR-30c-2-3p	down	miRNA	CDC25A	up	mRNA
DDX12P	up	lncRNA	hsa-miR-30c-2-3p	down	miRNA	CDC25A	up	mRNA
RP11-303E16.2	up	lncRNA	hsa-miR-30c-2-3p	down	miRNA	CDC25A	up	mRNA
RP11-424C20.2	up	lncRNA	hsa-miR-30c-2-3p	down	miRNA	CDC25A	up	mRNA
RP11-564D11.3	up	lncRNA	hsa-miR-30c-2-3p	down	miRNA	CDC25A	up	mRNA
TMPO-AS1	up	lncRNA	hsa-miR-30c-2-3p	down	miRNA	CDC25A	up	mRNA
AP000251.3	up	lncRNA	hsa-miR-30c-2-3p	down	miRNA	EIF4A3	up	mRNA
CCDC150P1	up	lncRNA	hsa-miR-30c-2-3p	down	miRNA	EIF4A3	up	mRNA
DDX12P	up	lncRNA	hsa-miR-30c-2-3p	down	miRNA	EIF4A3	up	mRNA
RP11-303E16.2	up	lncRNA	hsa-miR-30c-2-3p	down	miRNA	EIF4A3	up	mRNA
RP11-424C20.2	up	lncRNA	hsa-miR-30c-2-3p	down	miRNA	EIF4A3	up	mRNA
RP11-564D11.3	up	lncRNA	hsa-miR-30c-2-3p	down	miRNA	EIF4A3	up	mRNA
TMPO-AS1	up	lncRNA	hsa-miR-30c-2-3p	down	miRNA	EIF4A3	up	mRNA
AP000251.3	up	lncRNA	hsa-miR-30c-2-3p	down	miRNA	GINS4	up	mRNA
CCDC150P1	up	lncRNA	hsa-miR-30c-2-3p	down	miRNA	GINS4	up	mRNA
DDX12P	up	lncRNA	hsa-miR-30c-2-3p	down	miRNA	GINS4	up	mRNA
RP11-303E16.2	up	lncRNA	hsa-miR-30c-2-3p	down	miRNA	GINS4	up	mRNA
RP11-424C20.2	up	lncRNA	hsa-miR-30c-2-3p	down	miRNA	GINS4	up	mRNA
RP11-564D11.3	up	lncRNA	hsa-miR-30c-2-3p	down	miRNA	GINS4	up	mRNA
TMPO-AS1	up	lncRNA	hsa-miR-30c-2-3p	down	miRNA	GINS4	up	mRNA
AP000251.3	up	lncRNA	hsa-miR-30c-2-3p	down	miRNA	HDGF	up	mRNA
CCDC150P1	up	lncRNA	hsa-miR-30c-2-3p	down	miRNA	HDGF	up	mRNA
DDX12P	up	lncRNA	hsa-miR-30c-2-3p	down	miRNA	HDGF	up	mRNA
RP11-303E16.2	up	lncRNA	hsa-miR-30c-2-3p	down	miRNA	HDGF	up	mRNA
RP11-424C20.2	up	lncRNA	hsa-miR-30c-2-3p	down	miRNA	HDGF	up	mRNA
RP11-564D11.3	up	lncRNA	hsa-miR-30c-2-3p	down	miRNA	HDGF	up	mRNA
TMPO-AS1	up	lncRNA	hsa-miR-30c-2-3p	down	miRNA	HDGF	up	mRNA
AP000251.3	up	lncRNA	hsa-miR-30c-2-3p	down	miRNA	KPNB1	up	mRNA
CCDC150P1	up	lncRNA	hsa-miR-30c-2-3p	down	miRNA	KPNB1	up	mRNA
DDX12P	up	lncRNA	hsa-miR-30c-2-3p	down	miRNA	KPNB1	up	mRNA
RP11-303E16.2	up	lncRNA	hsa-miR-30c-2-3p	down	miRNA	KPNB1	up	mRNA
RP11-424C20.2	up	lncRNA	hsa-miR-30c-2-3p	down	miRNA	KPNB1	up	mRNA
RP11-564D11.3	up	lncRNA	hsa-miR-30c-2-3p	down	miRNA	KPNB1	up	mRNA
TMPO-AS1	up	lncRNA	hsa-miR-30c-2-3p	down	miRNA	KPNB1	up	mRNA
AP000251.3	up	lncRNA	hsa-miR-30c-2-3p	down	miRNA	MYBL2	up	mRNA
CCDC150P1	up	lncRNA	hsa-miR-30c-2-3p	down	miRNA	MYBL2	up	mRNA
DDX12P	up	lncRNA	hsa-miR-30c-2-3p	down	miRNA	MYBL2	up	mRNA
RP11-303E16.2	up	lncRNA	hsa-miR-30c-2-3p	down	miRNA	MYBL2	up	mRNA
RP11-424C20.2	up	lncRNA	hsa-miR-30c-2-3p	down	miRNA	MYBL2	up	mRNA
RP11-564D11.3	up	lncRNA	hsa-miR-30c-2-3p	down	miRNA	MYBL2	up	mRNA
TMPO-AS1	up	lncRNA	hsa-miR-30c-2-3p	down	miRNA	MYBL2	up	mRNA
AP000251.3	up	lncRNA	hsa-miR-30c-2-3p	down	miRNA	PAICS	up	mRNA
CCDC150P1	up	lncRNA	hsa-miR-30c-2-3p	down	miRNA	PAICS	up	mRNA
DDX12P	up	lncRNA	hsa-miR-30c-2-3p	down	miRNA	PAICS	up	mRNA
RP11-303E16.2	up	lncRNA	hsa-miR-30c-2-3p	down	miRNA	PAICS	up	mRNA
RP11-424C20.2	up	lncRNA	hsa-miR-30c-2-3p	down	miRNA	PAICS	up	mRNA
RP11-564D11.3	up	lncRNA	hsa-miR-30c-2-3p	down	miRNA	PAICS	up	mRNA
TMPO-AS1	up	lncRNA	hsa-miR-30c-2-3p	down	miRNA	PAICS	up	mRNA
AP000251.3	up	lncRNA	hsa-miR-30c-2-3p	down	miRNA	PSRC1	up	mRNA
CCDC150P1	up	lncRNA	hsa-miR-30c-2-3p	down	miRNA	PSRC1	up	mRNA
DDX12P	up	lncRNA	hsa-miR-30c-2-3p	down	miRNA	PSRC1	up	mRNA
RP11-303E16.2	up	lncRNA	hsa-miR-30c-2-3p	down	miRNA	PSRC1	up	mRNA
RP11-424C20.2	up	lncRNA	hsa-miR-30c-2-3p	down	miRNA	PSRC1	up	mRNA
RP11-564D11.3	up	lncRNA	hsa-miR-30c-2-3p	down	miRNA	PSRC1	up	mRNA
TMPO-AS1	up	lncRNA	hsa-miR-30c-2-3p	down	miRNA	PSRC1	up	mRNA
AP000251.3	up	lncRNA	hsa-miR-30c-2-3p	down	miRNA	SKA1	up	mRNA
CCDC150P1	up	lncRNA	hsa-miR-30c-2-3p	down	miRNA	SKA1	up	mRNA
DDX12P	up	lncRNA	hsa-miR-30c-2-3p	down	miRNA	SKA1	up	mRNA
RP11-303E16.2	up	lncRNA	hsa-miR-30c-2-3p	down	miRNA	SKA1	up	mRNA
RP11-424C20.2	up	lncRNA	hsa-miR-30c-2-3p	down	miRNA	SKA1	up	mRNA
RP11-564D11.3	up	lncRNA	hsa-miR-30c-2-3p	down	miRNA	SKA1	up	mRNA
TMPO-AS1	up	lncRNA	hsa-miR-30c-2-3p	down	miRNA	SKA1	up	mRNA
AP000251.3	up	lncRNA	hsa-miR-30c-2-3p	down	miRNA	SLC7A1	up	mRNA
CCDC150P1	up	lncRNA	hsa-miR-30c-2-3p	down	miRNA	SLC7A1	up	mRNA
DDX12P	up	lncRNA	hsa-miR-30c-2-3p	down	miRNA	SLC7A1	up	mRNA
RP11-303E16.2	up	lncRNA	hsa-miR-30c-2-3p	down	miRNA	SLC7A1	up	mRNA
RP11-424C20.2	up	lncRNA	hsa-miR-30c-2-3p	down	miRNA	SLC7A1	up	mRNA
RP11-564D11.3	up	lncRNA	hsa-miR-30c-2-3p	down	miRNA	SLC7A1	up	mRNA
TMPO-AS1	up	lncRNA	hsa-miR-30c-2-3p	down	miRNA	SLC7A1	up	mRNA
AP000251.3	up	lncRNA	hsa-miR-30c-2-3p	down	miRNA	STIP1	up	mRNA
CCDC150P1	up	lncRNA	hsa-miR-30c-2-3p	down	miRNA	STIP1	up	mRNA
DDX12P	up	lncRNA	hsa-miR-30c-2-3p	down	miRNA	STIP1	up	mRNA
RP11-303E16.2	up	lncRNA	hsa-miR-30c-2-3p	down	miRNA	STIP1	up	mRNA
RP11-424C20.2	up	lncRNA	hsa-miR-30c-2-3p	down	miRNA	STIP1	up	mRNA
RP11-564D11.3	up	lncRNA	hsa-miR-30c-2-3p	down	miRNA	STIP1	up	mRNA
TMPO-AS1	up	lncRNA	hsa-miR-30c-2-3p	down	miRNA	STIP1	up	mRNA
AP000251.3	up	lncRNA	hsa-miR-30c-2-3p	down	miRNA	WDR76	up	mRNA
CCDC150P1	up	lncRNA	hsa-miR-30c-2-3p	down	miRNA	WDR76	up	mRNA
DDX12P	up	lncRNA	hsa-miR-30c-2-3p	down	miRNA	WDR76	up	mRNA
RP11-303E16.2	up	lncRNA	hsa-miR-30c-2-3p	down	miRNA	WDR76	up	mRNA
RP11-424C20.2	up	lncRNA	hsa-miR-30c-2-3p	down	miRNA	WDR76	up	mRNA
RP11-564D11.3	up	lncRNA	hsa-miR-30c-2-3p	down	miRNA	WDR76	up	mRNA
TMPO-AS1	up	lncRNA	hsa-miR-30c-2-3p	down	miRNA	WDR76	up	mRNA
AP000251.3	up	lncRNA	hsa-miR-30c-2-3p	down	miRNA	XPO5	up	mRNA
CCDC150P1	up	lncRNA	hsa-miR-30c-2-3p	down	miRNA	XPO5	up	mRNA
DDX12P	up	lncRNA	hsa-miR-30c-2-3p	down	miRNA	XPO5	up	mRNA
RP11-303E16.2	up	lncRNA	hsa-miR-30c-2-3p	down	miRNA	XPO5	up	mRNA
RP11-424C20.2	up	lncRNA	hsa-miR-30c-2-3p	down	miRNA	XPO5	up	mRNA
RP11-564D11.3	up	lncRNA	hsa-miR-30c-2-3p	down	miRNA	XPO5	up	mRNA
TMPO-AS1	up	lncRNA	hsa-miR-30c-2-3p	down	miRNA	XPO5	up	mRNA
AP000251.3	up	lncRNA	hsa-miR-30c-2-3p	down	miRNA	XRCC2	up	mRNA
CCDC150P1	up	lncRNA	hsa-miR-30c-2-3p	down	miRNA	XRCC2	up	mRNA
DDX12P	up	lncRNA	hsa-miR-30c-2-3p	down	miRNA	XRCC2	up	mRNA
RP11-303E16.2	up	lncRNA	hsa-miR-30c-2-3p	down	miRNA	XRCC2	up	mRNA
RP11-424C20.2	up	lncRNA	hsa-miR-30c-2-3p	down	miRNA	XRCC2	up	mRNA
RP11-564D11.3	up	lncRNA	hsa-miR-30c-2-3p	down	miRNA	XRCC2	up	mRNA
TMPO-AS1	up	lncRNA	hsa-miR-30c-2-3p	down	miRNA	XRCC2	up	mRNA
TMPO-AS1	up	lncRNA	hsa-miR-34b-3p	down	miRNA	ARHGEF39	up	mRNA
TMPO-AS1	up	lncRNA	hsa-miR-34b-3p	down	miRNA	SLC7A1	up	mRNA
CCDC150P1	up	lncRNA	hsa-miR-34c-5p	down	miRNA	CDCA5	up	mRNA
DDX12P	up	lncRNA	hsa-miR-34c-5p	down	miRNA	CDCA5	up	mRNA
RP11-259N19.1	up	lncRNA	hsa-miR-34c-5p	down	miRNA	CDCA5	up	mRNA
RP11-424C20.2	up	lncRNA	hsa-miR-34c-5p	down	miRNA	CDCA5	up	mRNA
RP11-443B20.1	up	lncRNA	hsa-miR-34c-5p	down	miRNA	CDCA5	up	mRNA
TMPO-AS1	up	lncRNA	hsa-miR-34c-5p	down	miRNA	CDCA5	up	mRNA
TYMSOS	up	lncRNA	hsa-miR-34c-5p	down	miRNA	CDCA5	up	mRNA
CCDC150P1	up	lncRNA	hsa-miR-34c-5p	down	miRNA	GINS4	up	mRNA
DDX12P	up	lncRNA	hsa-miR-34c-5p	down	miRNA	GINS4	up	mRNA
RP11-259N19.1	up	lncRNA	hsa-miR-34c-5p	down	miRNA	GINS4	up	mRNA
RP11-424C20.2	up	lncRNA	hsa-miR-34c-5p	down	miRNA	GINS4	up	mRNA
RP11-443B20.1	up	lncRNA	hsa-miR-34c-5p	down	miRNA	GINS4	up	mRNA
TMPO-AS1	up	lncRNA	hsa-miR-34c-5p	down	miRNA	GINS4	up	mRNA
TYMSOS	up	lncRNA	hsa-miR-34c-5p	down	miRNA	GINS4	up	mRNA
CCDC150P1	up	lncRNA	hsa-miR-34c-5p	down	miRNA	NOL10	up	mRNA
DDX12P	up	lncRNA	hsa-miR-34c-5p	down	miRNA	NOL10	up	mRNA
RP11-259N19.1	up	lncRNA	hsa-miR-34c-5p	down	miRNA	NOL10	up	mRNA
RP11-424C20.2	up	lncRNA	hsa-miR-34c-5p	down	miRNA	NOL10	up	mRNA
RP11-443B20.1	up	lncRNA	hsa-miR-34c-5p	down	miRNA	NOL10	up	mRNA
TMPO-AS1	up	lncRNA	hsa-miR-34c-5p	down	miRNA	NOL10	up	mRNA
TYMSOS	up	lncRNA	hsa-miR-34c-5p	down	miRNA	NOL10	up	mRNA
CCDC150P1	up	lncRNA	hsa-miR-34c-5p	down	miRNA	NOP2	up	mRNA
DDX12P	up	lncRNA	hsa-miR-34c-5p	down	miRNA	NOP2	up	mRNA
RP11-259N19.1	up	lncRNA	hsa-miR-34c-5p	down	miRNA	NOP2	up	mRNA
RP11-424C20.2	up	lncRNA	hsa-miR-34c-5p	down	miRNA	NOP2	up	mRNA
RP11-443B20.1	up	lncRNA	hsa-miR-34c-5p	down	miRNA	NOP2	up	mRNA
TMPO-AS1	up	lncRNA	hsa-miR-34c-5p	down	miRNA	NOP2	up	mRNA
TYMSOS	up	lncRNA	hsa-miR-34c-5p	down	miRNA	NOP2	up	mRNA
CCDC150P1	up	lncRNA	hsa-miR-34c-5p	down	miRNA	YWHAG	up	mRNA
DDX12P	up	lncRNA	hsa-miR-34c-5p	down	miRNA	YWHAG	up	mRNA
RP11-259N19.1	up	lncRNA	hsa-miR-34c-5p	down	miRNA	YWHAG	up	mRNA
RP11-424C20.2	up	lncRNA	hsa-miR-34c-5p	down	miRNA	YWHAG	up	mRNA
RP11-443B20.1	up	lncRNA	hsa-miR-34c-5p	down	miRNA	YWHAG	up	mRNA
TMPO-AS1	up	lncRNA	hsa-miR-34c-5p	down	miRNA	YWHAG	up	mRNA
TYMSOS	up	lncRNA	hsa-miR-34c-5p	down	miRNA	YWHAG	up	mRNA
CCDC150P1	up	lncRNA	hsa-miR-4709-3p	down	miRNA	BRCA1	up	mRNA
DDX12P	up	lncRNA	hsa-miR-4709-3p	down	miRNA	BRCA1	up	mRNA
RP11-303E16.2	up	lncRNA	hsa-miR-4709-3p	down	miRNA	BRCA1	up	mRNA
RP11-424C20.2	up	lncRNA	hsa-miR-4709-3p	down	miRNA	BRCA1	up	mRNA
RP11-443B20.1	up	lncRNA	hsa-miR-4709-3p	down	miRNA	BRCA1	up	mRNA
RP11-564D11.3	up	lncRNA	hsa-miR-4709-3p	down	miRNA	BRCA1	up	mRNA
TMPO-AS1	up	lncRNA	hsa-miR-4709-3p	down	miRNA	BRCA1	up	mRNA
CCDC150P1	up	lncRNA	hsa-miR-4709-3p	down	miRNA	CDCA8	up	mRNA
DDX12P	up	lncRNA	hsa-miR-4709-3p	down	miRNA	CDCA8	up	mRNA
RP11-303E16.2	up	lncRNA	hsa-miR-4709-3p	down	miRNA	CDCA8	up	mRNA
RP11-424C20.2	up	lncRNA	hsa-miR-4709-3p	down	miRNA	CDCA8	up	mRNA
RP11-443B20.1	up	lncRNA	hsa-miR-4709-3p	down	miRNA	CDCA8	up	mRNA
RP11-564D11.3	up	lncRNA	hsa-miR-4709-3p	down	miRNA	CDCA8	up	mRNA
TMPO-AS1	up	lncRNA	hsa-miR-4709-3p	down	miRNA	CDCA8	up	mRNA
CCDC150P1	up	lncRNA	hsa-miR-4709-3p	down	miRNA	E2F7	up	mRNA
DDX12P	up	lncRNA	hsa-miR-4709-3p	down	miRNA	E2F7	up	mRNA
RP11-303E16.2	up	lncRNA	hsa-miR-4709-3p	down	miRNA	E2F7	up	mRNA
RP11-424C20.2	up	lncRNA	hsa-miR-4709-3p	down	miRNA	E2F7	up	mRNA
RP11-443B20.1	up	lncRNA	hsa-miR-4709-3p	down	miRNA	E2F7	up	mRNA
RP11-564D11.3	up	lncRNA	hsa-miR-4709-3p	down	miRNA	E2F7	up	mRNA
TMPO-AS1	up	lncRNA	hsa-miR-4709-3p	down	miRNA	E2F7	up	mRNA
CCDC150P1	up	lncRNA	hsa-miR-4709-3p	down	miRNA	GINS3	up	mRNA
DDX12P	up	lncRNA	hsa-miR-4709-3p	down	miRNA	GINS3	up	mRNA
RP11-303E16.2	up	lncRNA	hsa-miR-4709-3p	down	miRNA	GINS3	up	mRNA
RP11-424C20.2	up	lncRNA	hsa-miR-4709-3p	down	miRNA	GINS3	up	mRNA
RP11-443B20.1	up	lncRNA	hsa-miR-4709-3p	down	miRNA	GINS3	up	mRNA
RP11-564D11.3	up	lncRNA	hsa-miR-4709-3p	down	miRNA	GINS3	up	mRNA
TMPO-AS1	up	lncRNA	hsa-miR-4709-3p	down	miRNA	GINS3	up	mRNA
CCDC150P1	up	lncRNA	hsa-miR-4709-3p	down	miRNA	HMGA1	up	mRNA
DDX12P	up	lncRNA	hsa-miR-4709-3p	down	miRNA	HMGA1	up	mRNA
RP11-303E16.2	up	lncRNA	hsa-miR-4709-3p	down	miRNA	HMGA1	up	mRNA
RP11-424C20.2	up	lncRNA	hsa-miR-4709-3p	down	miRNA	HMGA1	up	mRNA
RP11-443B20.1	up	lncRNA	hsa-miR-4709-3p	down	miRNA	HMGA1	up	mRNA
RP11-564D11.3	up	lncRNA	hsa-miR-4709-3p	down	miRNA	HMGA1	up	mRNA
TMPO-AS1	up	lncRNA	hsa-miR-4709-3p	down	miRNA	HMGA1	up	mRNA
CCDC150P1	up	lncRNA	hsa-miR-4709-3p	down	miRNA	LMNB1	up	mRNA
DDX12P	up	lncRNA	hsa-miR-4709-3p	down	miRNA	LMNB1	up	mRNA
RP11-303E16.2	up	lncRNA	hsa-miR-4709-3p	down	miRNA	LMNB1	up	mRNA
RP11-424C20.2	up	lncRNA	hsa-miR-4709-3p	down	miRNA	LMNB1	up	mRNA
RP11-443B20.1	up	lncRNA	hsa-miR-4709-3p	down	miRNA	LMNB1	up	mRNA
RP11-564D11.3	up	lncRNA	hsa-miR-4709-3p	down	miRNA	LMNB1	up	mRNA
TMPO-AS1	up	lncRNA	hsa-miR-4709-3p	down	miRNA	LMNB1	up	mRNA
CCDC150P1	up	lncRNA	hsa-miR-4709-3p	down	miRNA	NUSAP1	up	mRNA
DDX12P	up	lncRNA	hsa-miR-4709-3p	down	miRNA	NUSAP1	up	mRNA
RP11-303E16.2	up	lncRNA	hsa-miR-4709-3p	down	miRNA	NUSAP1	up	mRNA
RP11-424C20.2	up	lncRNA	hsa-miR-4709-3p	down	miRNA	NUSAP1	up	mRNA
RP11-443B20.1	up	lncRNA	hsa-miR-4709-3p	down	miRNA	NUSAP1	up	mRNA
RP11-564D11.3	up	lncRNA	hsa-miR-4709-3p	down	miRNA	NUSAP1	up	mRNA
TMPO-AS1	up	lncRNA	hsa-miR-4709-3p	down	miRNA	NUSAP1	up	mRNA
CCDC150P1	up	lncRNA	hsa-miR-4709-3p	down	miRNA	PSMD11	up	mRNA
DDX12P	up	lncRNA	hsa-miR-4709-3p	down	miRNA	PSMD11	up	mRNA
RP11-303E16.2	up	lncRNA	hsa-miR-4709-3p	down	miRNA	PSMD11	up	mRNA
RP11-424C20.2	up	lncRNA	hsa-miR-4709-3p	down	miRNA	PSMD11	up	mRNA
RP11-443B20.1	up	lncRNA	hsa-miR-4709-3p	down	miRNA	PSMD11	up	mRNA
RP11-564D11.3	up	lncRNA	hsa-miR-4709-3p	down	miRNA	PSMD11	up	mRNA
TMPO-AS1	up	lncRNA	hsa-miR-4709-3p	down	miRNA	PSMD11	up	mRNA
CCDC150P1	up	lncRNA	hsa-miR-4709-3p	down	miRNA	SKP2	up	mRNA
DDX12P	up	lncRNA	hsa-miR-4709-3p	down	miRNA	SKP2	up	mRNA
RP11-303E16.2	up	lncRNA	hsa-miR-4709-3p	down	miRNA	SKP2	up	mRNA
RP11-424C20.2	up	lncRNA	hsa-miR-4709-3p	down	miRNA	SKP2	up	mRNA
RP11-443B20.1	up	lncRNA	hsa-miR-4709-3p	down	miRNA	SKP2	up	mRNA
RP11-564D11.3	up	lncRNA	hsa-miR-4709-3p	down	miRNA	SKP2	up	mRNA
TMPO-AS1	up	lncRNA	hsa-miR-4709-3p	down	miRNA	SKP2	up	mRNA

## Sheet: core regulatory axis
ceRNA regulatory axis containing genes with prognositic value
	TCGA	GEO		TCGA		TCGA	GEO
lncRNAs	p value	p value	miRNAs	p value	mRNAs	p value	p value
LINC00324	0.0061	0	hsa-miR-9-5p	0.0498	GAB3	0.0026	0.0006
LINC00892	0.0062	0.0035			SNX20	0.0163	0.0384
GGTA1P	0.0125	0.0459
GVINP1	0.0174	0.0038
MIR155HG	0.042	0.0423
